# Supplementary material for: Fluorinated 2,3-diaminophenazines: synthesis, mechanism of formation, and properties
Source: Royal Society of Chemistry journal article supplement (doi:10.1039/d3nj02875e), 2023-01-01

## Supporting Information for

### Fluorinated 2,3-diaminophenazines: synthesis, mechanism of formation, properties

Jiayao Li<sup>a,b</sup>, Vyacheslav Krasnov<sup>a</sup>, Elena Karpova<sup>a</sup>, Rodion Andreev<sup>a</sup>, Alexandr Genaev<sup>a</sup>, Elizabeth Rummyantseva<sup>a,b</sup>, Inna Shundrina<sup>a</sup>, Vasily Romanov<sup>a,b</sup> and Galina Selivanova\*<sup>a</sup>

N.N. Vorozhtsov Novosibirsk Institute of Organic Chemistry of Siberian Branch of Russian Academy of Sciences, 9 Ac. Lavrentiev Avenue, Novosibirsk 630090, Russia

<sup>b</sup>Novosibirsk State University, 2 Pirogova Str., Novosibirsk 630090, Russia

|   |                                                                                                                                                                                                |    |
|---|------------------------------------------------------------------------------------------------------------------------------------------------------------------------------------------------|----|
|   | Contents                                                                                                                                                                                       | 1  |
| 1 | General methods                                                                                                                                                                                | 2  |
| 2 | Numbering of the optimized structures protonated fluorinated <b>o</b> -PDAs <b>B</b> and phenylenediimines <b>C</b> ( <b>Fig. S1</b> , <b>Table S1</b> )                                       | 4  |
| 3 | References                                                                                                                                                                                     | 16 |
| 4 | Absorption and emission spectra of 2,3-diaminophenazines ( <b>Fig. S2</b> )                                                                                                                    | 17 |
| 5 | Quantum chemical calculations of relative values of chemical shifts of signals in <sup>1</sup> H, <sup>19</sup> F, <sup>13</sup> C, <sup>15</sup> N spectra ( <b>Tables S2</b> and <b>S3</b> ) | 18 |
| 6 | <sup>1</sup> H, <sup>19</sup> F and <sup>13</sup> C NMR spectra of the synthesized <b>DAPs 9–16</b>                                                                                            | 20 |

---

\* Corresponding author.

E-mail: [galseliv@nioch.nsc.ru](mailto:galseliv@nioch.nsc.ru) (G. A. Selivanova)

## 1. General methods

All NMR spectra were recorded in DMSO-d<sub>6</sub> solution at room temperature (293 K), unless otherwise noted, on a Bruker AV-300 spectrometer operating at 300.13 MHz for <sup>1</sup>H, 282.40 MHz for <sup>19</sup>F, or Bruker AV-400 (400.13 MHz for <sup>1</sup>H, 376.50 for <sup>19</sup>F, 100.61 for <sup>13</sup>C and 40.54 MHz for <sup>15</sup>N), or Bruker DRX-500 (500.13 MHz for <sup>1</sup>H, 125.76 MHz for <sup>13</sup>C), or Bruker AV-600 (600.30 MHz for <sup>1</sup>H, 150.95 MHz for <sup>13</sup>C and 60.83 MHz for <sup>15</sup>N). <sup>1</sup>H, <sup>19</sup>F and <sup>13</sup>C spectra were referenced internally in ppm,  $\delta$  2.50 for <sup>1</sup>H (to DMSO-d<sub>5</sub>),  $\delta$  0.00 for <sup>19</sup>F (to C<sub>6</sub>F<sub>6</sub>) and  $\delta$  39.50 for <sup>13</sup>C (to DMSO-d<sub>6</sub>). <sup>15</sup>N chemical shifts for **DAPs 9, 10, 12, 13, and 15** were obtained indirectly from <sup>1</sup>H-<sup>15</sup>N HMBC experiment and referred to ammonia (0 ppm). 2D NMR experiments were performed on the Bruker AV600 spectrometer or on the Bruker AV400 spectrometer, equipped with a 5 mm zaxis field-gradient probehead. Bruker programs for pulse sequence were used. Typical parameters for 2D NMR experiments were as follow. Spectral width was optimized to cover all signals. FID data was processed with zero-filling and sine-bell function weighting applied prior to Fourier transformation, in order for the resolution to be optimized appropriately. Delay times for relaxation are set to 2-3 s in all 2D NMR experiments. COSY: cosygpqf - pulse program, gradient pulses for selection was used, 4 K x 256 (<sup>1</sup>H-<sup>1</sup>H COSY) or 8 K x 512 (<sup>19</sup>F-<sup>19</sup>F COSY) time-domain data matrix, 1 scan for each FID. <sup>1</sup>H-<sup>13</sup>C HSQC: hsqcetgp - pulse program, echo/antiecho acqution mode, 1 K x 512 time-domain data matrix, GARP composite pulse decoupling during acquisition, 1-8 scans for each FID. <sup>1</sup>H-<sup>13</sup>C HMBC: hmbcgpndqf - pulse program, delay for evolution was specified for 7 Hz long-range coupling, 4 K x 512 time-domain data matrix, 8-16 scans for each FID. <sup>1</sup>H-<sup>15</sup>N HMBC: hmbcgpndqf - pulse program, delay for evolution was specified for 3 or 6 Hz long-range coupling, 4 K x 512 or 4 K x 640 time-domain data matrix, 16-32 scans for each FID.

Fluorescence measurements were made using a Cary Eclipse Fluorescence Spectrophotometer by Varian. Emission spectra were recorded within the range of 440 – 740 nm in quartz cuvettes with a light-absorbing layer thickness of 1×1 cm by varying the excitation wavelengths for determination of the Stokes shift values. Excitation and emission slit sizes were set at 5 nm. The scan rate was set at 600 nm/min with a data interval of 1.000 nm and an averaging time of 0.1 second. The excitation filter was set to auto, the emission filter set to open. To compare the fluorescence intensities of all samples excitation was set at 430 nm and the PMT detector voltage set to 650 V.

Gas phase calculations of the structures for the fluoro-phenylenediamines and fluoro-phenylenediimines were performed at the DFT level using the functional B3LYP with the basis set 6-31G(d). Atom charges were obtained from NBO-analysis.<sup>1</sup> All calculations were performed with default parameters using the GAMESS program.<sup>2</sup>

Images of calculated structures were built by the MOLDEN program.<sup>3</sup> Cartesian coordinates, total energies of the stationary structures and other results of these calculations are shown in Supp. Inf. (Fig. S1 and Table S1).

The quantum chemical calculation of the chemical shifts of the  $^1\text{H}$ ,  $^{19}\text{F}$ ,  $^{13}\text{C}$  and  $^{15}\text{N}$  nuclei was performed at PBE0/6-311+G(2d,p) level using ORCA program, v. 5.03.<sup>4</sup>

## 2. Numbering of the optimized structures protonated fluorinated *o*-PDAs **B** and phenylenediimines **C**

**Fig. S1.** Structures and numbering of the optimized structures protonated fluorinated *o*-PDAs **B** and fluorinated phenylenediimines **C** (B3LYP with the basis set 6-31G(d)) and charges on N,C-atoms obtained from NBO-analysis.

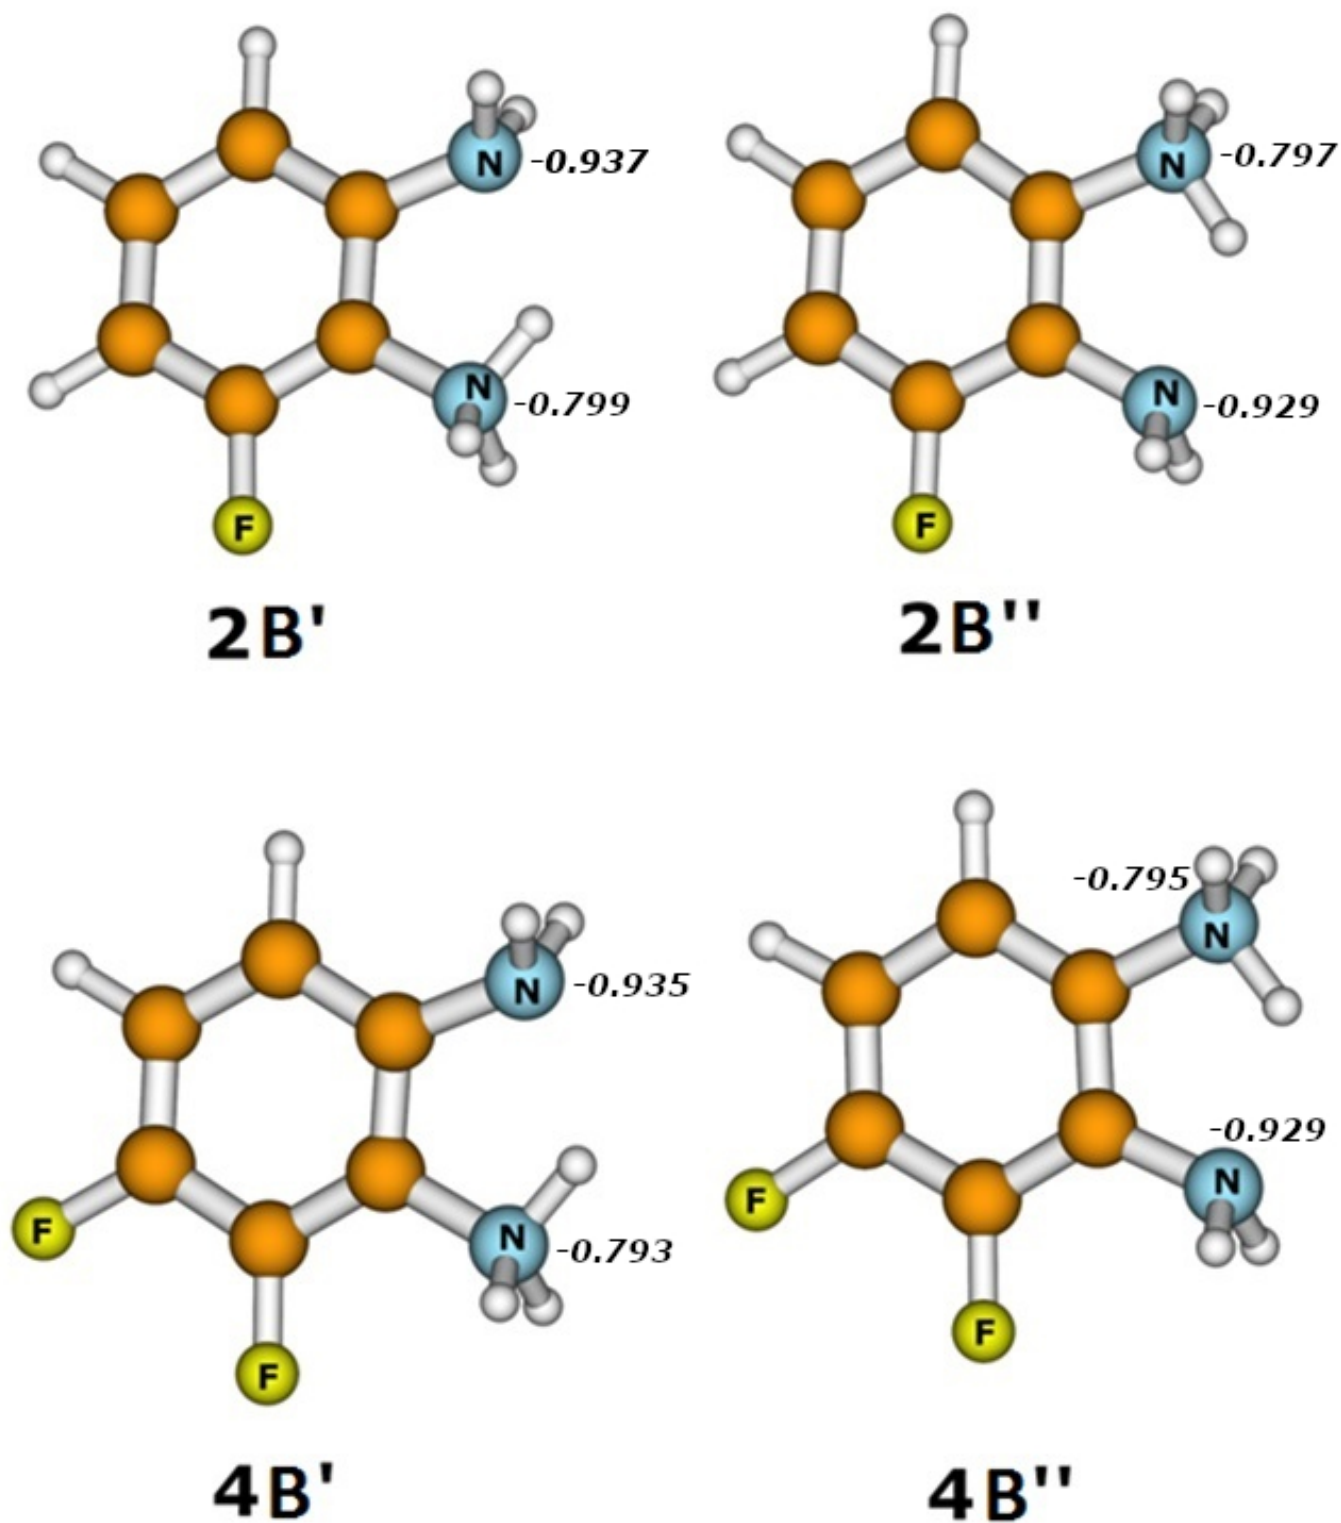

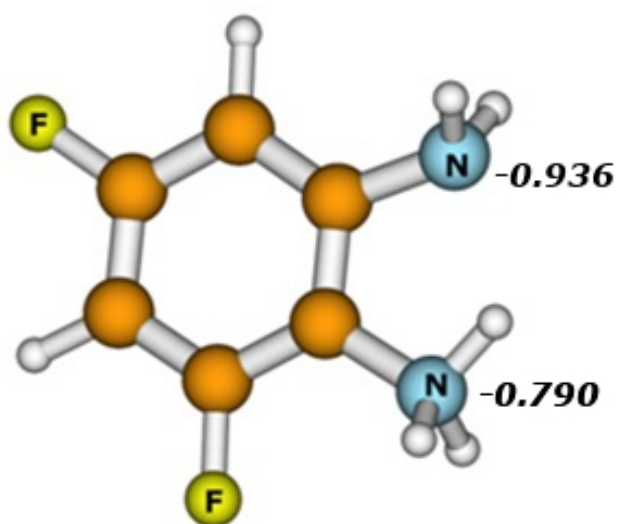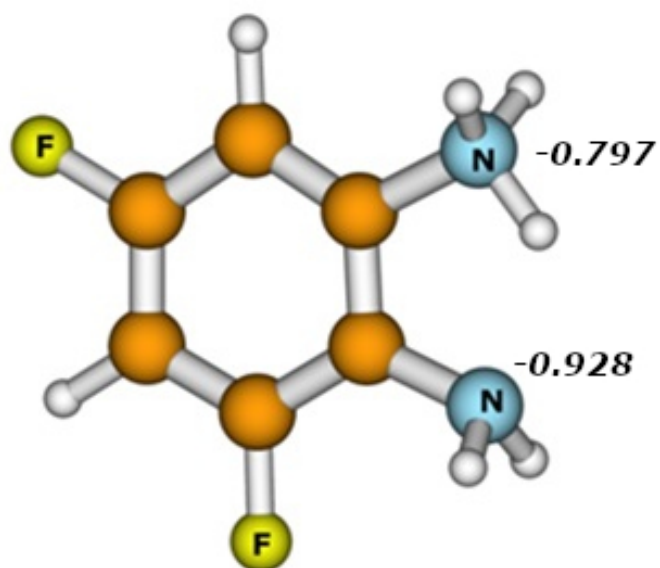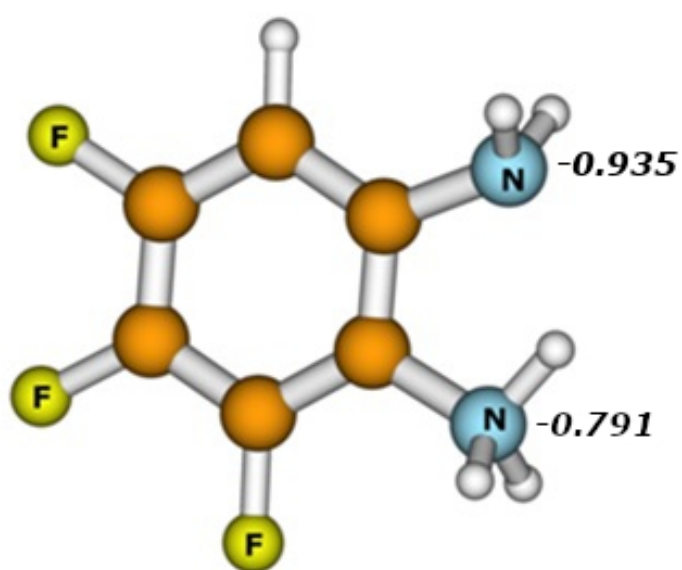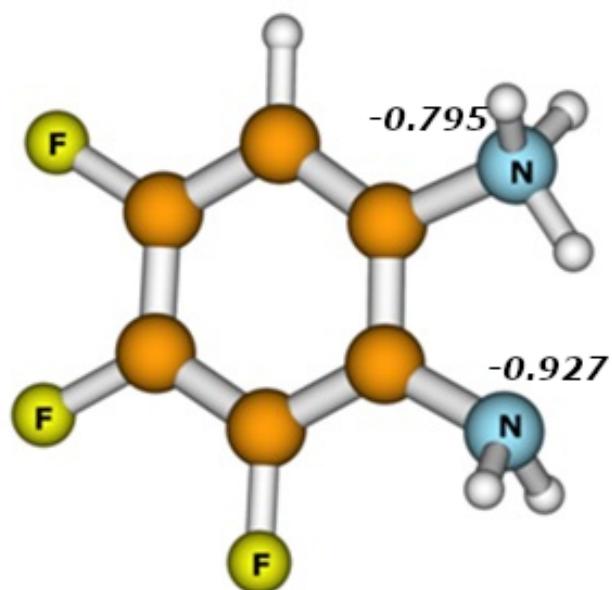

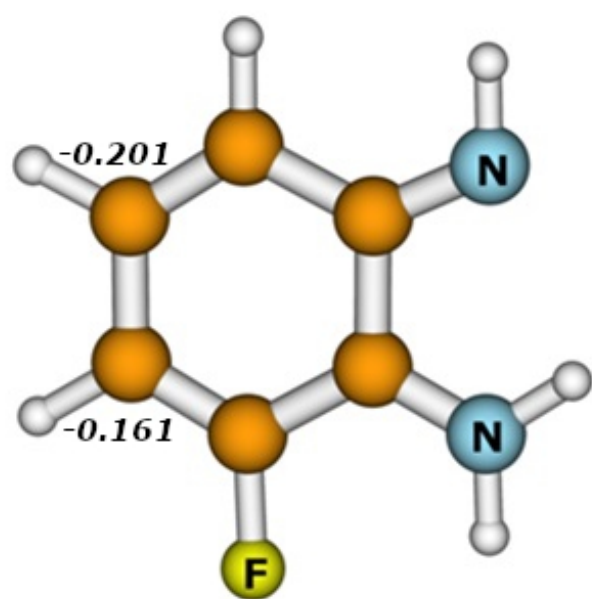

**2C'**

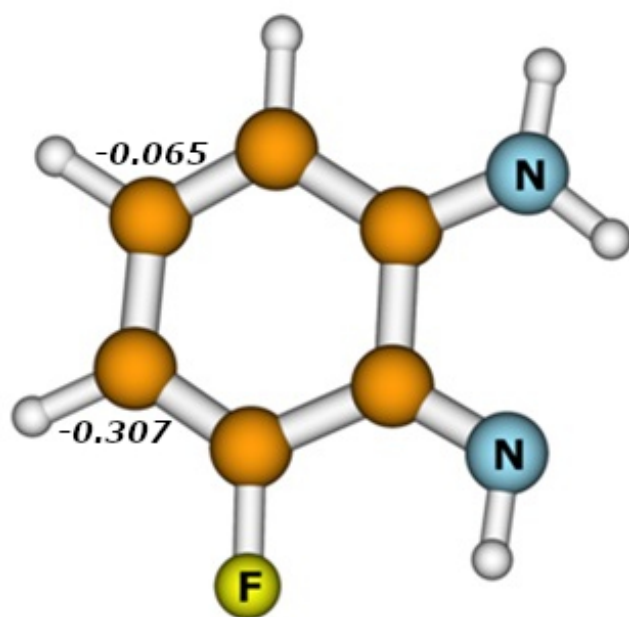

**2C''**

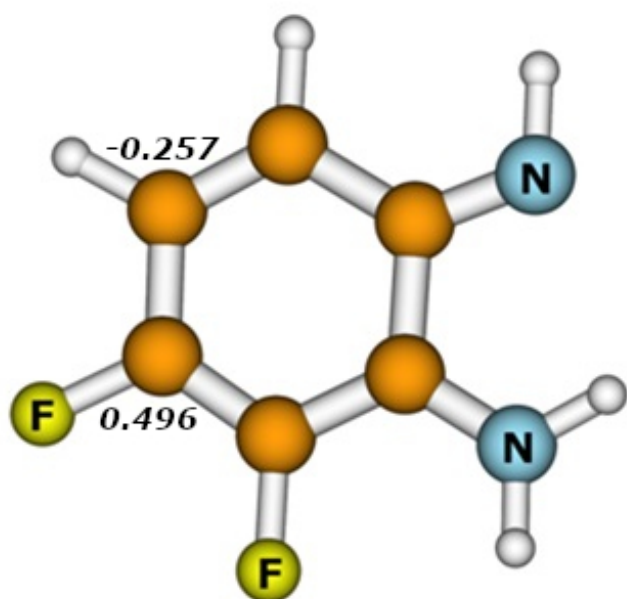

**4C'**

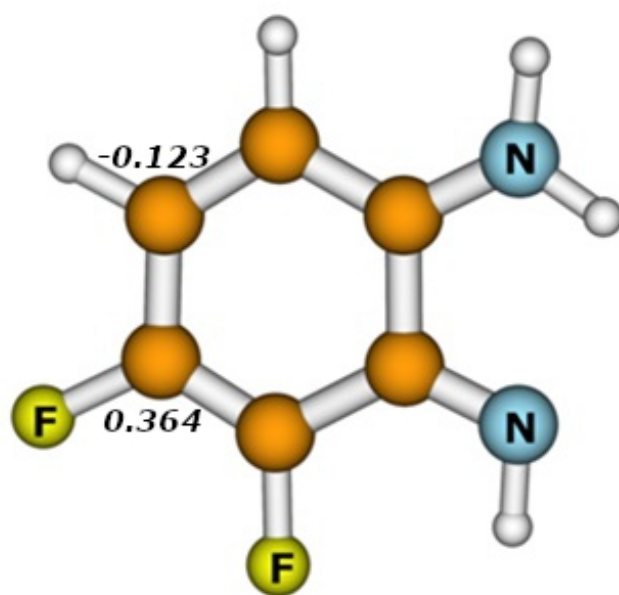

**4C''**

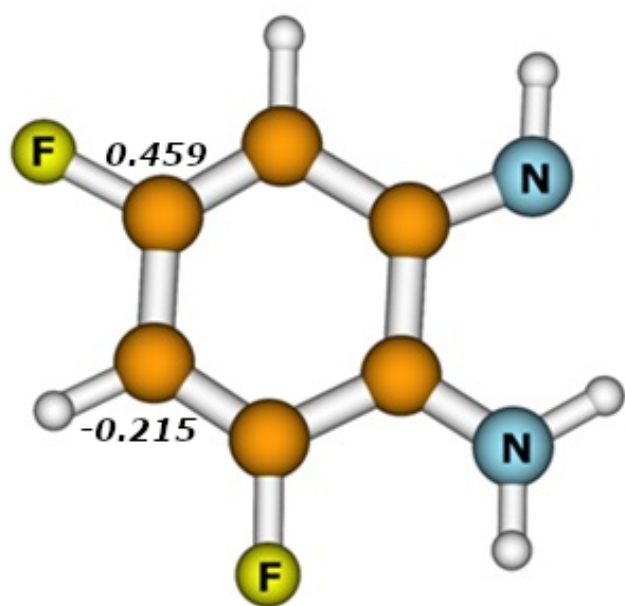

**5C'**

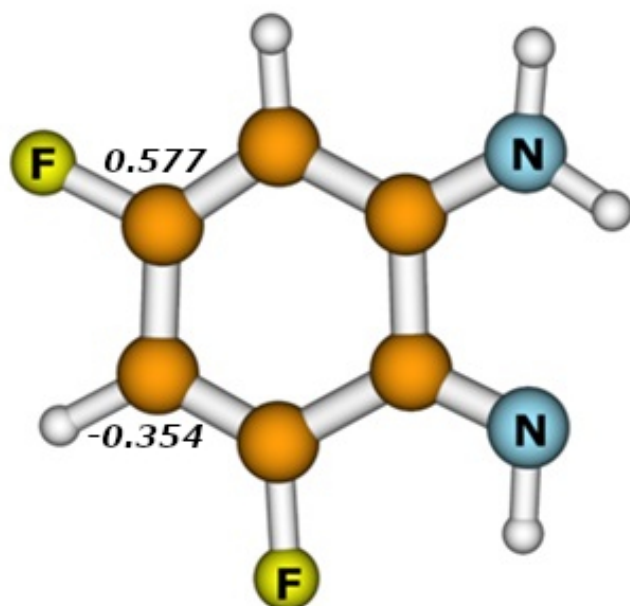

**5C''**

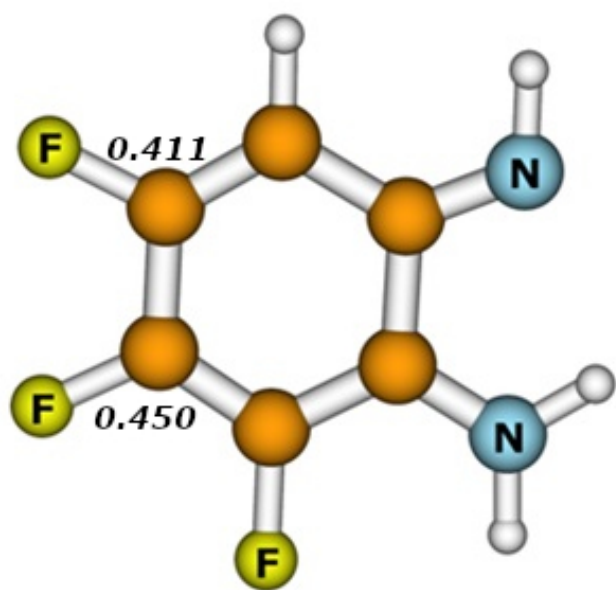

**7C'**

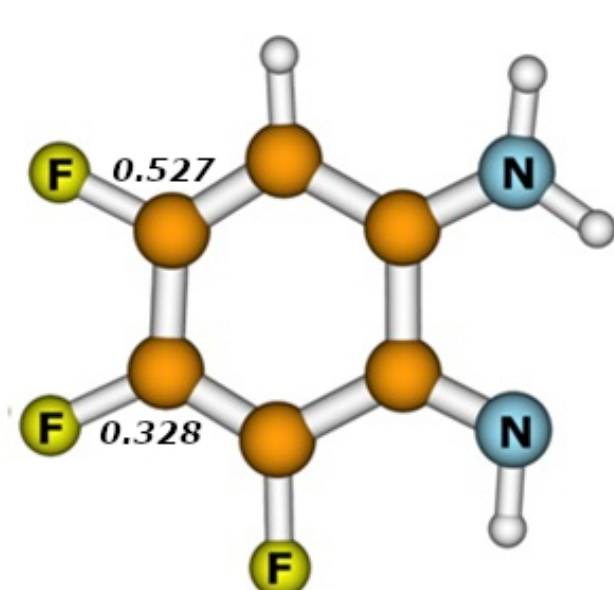

**7C''**

**Table S1.** Cartesian coordinates of the optimized structures protonated fluorinated **o**-PDAs **B** and phenylenediimines **C** by B3LYP/6-31G(d), GAMESS.

| <b>2B'</b>            | <b>X</b>      | <b>Y</b>      | <b>Z</b>      |
|-----------------------|---------------|---------------|---------------|
| E = - 442.303933 a.u. |               |               |               |
| C                     | -1.2699748770 | -1.3835938367 | 0.1166913974  |
| C                     | -0.0760000650 | -2.1120572570 | 0.0598383778  |
| C                     | 1.1683719123  | -1.4798031206 | -0.0219590917 |
| C                     | 1.2036856032  | -0.0926128986 | -0.0479645571 |
| C                     | 0.0210113034  | 0.6321012625  | 0.0079313851  |
| C                     | -1.2309516018 | 0.0110421571  | 0.0912931018  |
| F                     | 2.3556927688  | 0.5901635425  | -0.1289252658 |
| N                     | 0.0089854605  | 2.1019230491  | -0.0235050142 |
| N                     | -2.3518666018 | 0.9141364903  | 0.1402382967  |
| H                     | 2.0960139341  | -2.0403916181 | -0.0659200199 |
| H                     | -0.1136250584 | -3.1967128718 | 0.0800220805  |
| H                     | -2.2242366213 | -1.8973172486 | 0.1807238741  |
| H                     | -1.0259961841 | 2.3139188803  | 0.0254144545  |
| H                     | 0.4976032402  | 2.5315901671  | 0.7725259713  |
| H                     | 0.4130408174  | 2.4938673836  | -0.8836790710 |
| H                     | -3.0014563121 | 0.7571254674  | -0.6308934161 |
| H                     | -2.8857309045 | 0.8109887534  | 1.0037348050  |
| <br>                  |               |               |               |
| <b>2B''</b>           | <b>X</b>      | <b>Y</b>      | <b>Z</b>      |
| E = -442,304229 a.u.  |               |               |               |
| C                     | -1.2866355770 | -1.4835557888 | 0.0530482138  |
| C                     | -0.0491163395 | -2.1350447587 | 0.0836699768  |
| C                     | 1.1451790171  | -1.4117281002 | 0.0895013633  |
| C                     | 1.1016793374  | -0.0210213855 | 0.0655277416  |
| C                     | -0.1090433596 | 0.6744742147  | 0.0349787364  |
| C                     | -1.2772938072 | -0.0961890991 | 0.0291602181  |
| F                     | 2.2321589556  | 0.6909870783  | 0.0699081631  |
| N                     | -0.2600002303 | 2.1008628317  | 0.0045263214  |
| N                     | -2.5107908225 | 0.7233799803  | -0.0120329429 |
| H                     | 2.1089149033  | -1.9097996671 | 0.1121675413  |
| H                     | -0.0176493581 | -3.2195045375 | 0.1025615738  |
| H                     | -2.2132371113 | -2.0498312134 | 0.0474277335  |
| H                     | -3.0823800369 | 0.5574824081  | -0.8491808297 |
| H                     | -3.1106268719 | 0.6026602235  | 0.8132830519  |
| H                     | -2.1257369297 | 1.7102131681  | -0.0310230665 |
| H                     | 0.1534786735  | 2.5410592739  | 0.8278575937  |



H 0.2059809232 2.5108938156 -0.8061420823

**4B'** X Y Z

E = -541.493249 a.u.

|   |               |               |               |
|---|---------------|---------------|---------------|
| C | 1.4211231172  | 0.5604983251  | -0.0576390885 |
| C | 0.6947806411  | 1.7520870362  | -0.0220632922 |
| C | -0.7023616773 | 1.7237504726  | 0.0279159412  |
| C | -1.3878959813 | 0.5121287198  | 0.0436150123  |
| C | -0.6816974693 | -0.6916815345 | 0.0088967384  |
| C | 0.7029585585  | -0.6427647114 | -0.0410254169 |
| F | -2.7146526800 | 0.4736765758  | 0.0913279876  |
| F | -1.3023593322 | -1.8748276046 | 0.0210459541  |
| N | 1.5098368353  | -1.8699004294 | -0.0898823707 |
| N | 2.8510975120  | 0.4114099107  | -0.1154821111 |
| H | -1.2800794380 | 2.6420503348  | 0.0558102173  |
| H | 1.2137645904  | 2.7054605164  | -0.0333261717 |
| H | 3.3127062784  | 0.8148725195  | 0.7000742438  |
| H | 3.2511054929  | 0.8602967793  | -0.9397187954 |
| H | 2.4940721368  | -1.4812133897 | -0.1368637739 |
| H | 1.4039089788  | -2.4637021180 | 0.7431068457  |
| H | 1.3156959350  | -2.4521904744 | -0.9147951313 |

**4B''** X Y Z

E = -541.494728 a.u.

|   |               |               |               |
|---|---------------|---------------|---------------|
| C | 1.4587519604  | 0.6058673241  | 0.0482000434  |
| C | 0.7950405550  | 1.8232110560  | -0.0013138592 |
| C | -0.6015314465 | 1.8080103511  | -0.0427060884 |
| C | -1.2835881490 | 0.5952727190  | -0.0335998098 |
| C | -0.5911909881 | -0.6202394582 | 0.0163545371  |
| C | 0.8011027752  | -0.6327353179 | 0.0585514911  |
| F | -2.6102856126 | 0.5678754670  | -0.0723037104 |
| F | -1.2624729808 | -1.7697981767 | 0.0253178932  |
| N | 1.6172676156  | -1.8100966712 | 0.1184549714  |
| N | 2.9320566969  | 0.4837597140  | 0.0990123997  |
| H | -1.1731599175 | 2.7290123289  | -0.0822658415 |
| H | 1.3299617683  | 2.7680633217  | -0.0082061410 |
| H | 3.0731386124  | -0.5649713284 | 0.1342007227  |
| H | 3.4044749670  | 0.8664217919  | -0.7294184234 |
| H | 3.3510921662  | 0.9150925914  | 0.9321792189  |
| H | 1.4745306038  | -2.4126964844 | -0.6936185361 |

| H          | 1.4030707299  | -2.3747480186 | 0.9415726923  |
|------------|---------------|---------------|---------------|
| <b>5B'</b> | <b>X</b>      | <b>Y</b>      | <b>Z</b>      |
| E =        | -541.500282   | a.u.          |               |
| C          | -1.1014567957 | 0.0610616780  | -0.0129279491 |
| C          | -0.4955494265 | -1.2018564779 | -0.0485361078 |
| C          | 0.8947670415  | -1.2734607797 | -0.1029818302 |
| C          | 1.6238958593  | -0.0810905393 | -0.1200663077 |
| C          | 1.0292279786  | 1.1816773496  | -0.0850654834 |
| C          | -0.3540177606 | 1.2329864208  | -0.0305375101 |
| N          | -1.4116781743 | -2.3114778251 | -0.0237385035 |
| F          | 2.9505929976  | -0.1476003342 | -0.1728619893 |
| F          | -1.0121642043 | 2.3984336296  | 0.0073693237  |
| N          | -2.5686771866 | 0.0740524732  | 0.0459608326  |
| H          | 1.6271181636  | 2.0858995993  | -0.0998994027 |
| H          | 1.4171282335  | -2.2236456637 | -0.1321233809 |
| H          | -1.3242273804 | -2.8954282133 | -0.8561465427 |
| H          | -1.2542185293 | -2.9167846638 | 0.7826880000  |
| H          | -2.9404187962 | 0.5194447321  | 0.8950109035  |
| H          | -3.0068957371 | 0.5337114848  | -0.7628834836 |
| H          | -2.7989686899 | -0.9574850284 | 0.0459616806  |

| <b>5B''</b> | <b>X</b>      | <b>Y</b>      | <b>Z</b>      |
|-------------|---------------|---------------|---------------|
| E =         | -541.499783   | a.u.          |               |
| C           | 1.0753828428  | 0.0929783614  | -0.0847269612 |
| C           | 0.2717678864  | 1.2353842100  | -0.0086084730 |
| C           | -1.1136268061 | 1.2137479690  | 0.0424746426  |
| C           | -1.7124803699 | -0.0478202668 | 0.0150381240  |
| C           | -0.9761299438 | -1.2287194907 | -0.0589670998 |
| C           | 0.4095045819  | -1.1379736958 | -0.1081418508 |
| N           | 1.0516007822  | 2.4920957853  | 0.0149511866  |
| F           | -3.0398498734 | -0.1165168672 | 0.0619765650  |
| F           | 1.1473229906  | -2.2462376368 | -0.1805373429 |
| N           | 2.4947530074  | 0.2887540171  | -0.1300472668 |
| H           | -1.4723763274 | -2.1927811805 | -0.0780872126 |
| H           | -1.7274233705 | 2.1064434359  | 0.1014406592  |
| H           | 2.0498197975  | 2.1377661280  | -0.0346105623 |
| H           | 0.8599684278  | 3.1063957651  | -0.7861395256 |
| H           | 0.9185354405  | 3.0378437977  | 0.8753125561  |
| H           | 2.9671665526  | -0.1710146637 | 0.6494910576  |
| H           | 2.9046162026  | -0.0908878253 | -0.9846198012 |

**7B'****X****Y****Z**

E = -640.682927 a.u.

|   |               |               |               |
|---|---------------|---------------|---------------|
| C | -1.2473492266 | 0.3823871360  | -0.0122683399 |
| C | -1.2471017513 | -1.0174463370 | -0.0497863778 |
| C | -0.0195424720 | -1.6786202011 | -0.1029442220 |
| C | 1.1580640955  | -0.9324508863 | -0.1168211627 |
| C | 1.1490272540  | 0.4683104895  | -0.0792756808 |
| C | -0.0752686610 | 1.1284218394  | -0.0262508822 |
| N | -2.5503549663 | -1.6246684756 | -0.0294113682 |
| F | 2.3332312720  | -1.5442063662 | -0.1668529478 |
| F | 2.2802049768  | 1.1562701946  | -0.0938887159 |
| F | -0.1392305639 | 2.4611690024  | 0.0112756846  |
| N | -2.5649593581 | 1.0270709446  | 0.0433724214  |
| H | 0.0447914536  | -2.7613076443 | -0.1341890210 |
| H | -2.7201091541 | -2.1945014437 | -0.8586717940 |
| H | -2.6781362226 | -2.2299165137 | 0.7822335167  |
| H | -2.7127188349 | 1.5835305959  | 0.8958323090  |
| H | -2.7579465259 | 1.6358087651  | -0.7631199612 |
| H | -3.2187155030 | 0.1956156208  | 0.0359452097  |

**7B''****X****Y****Z**

E = -640.683479 a.u.

|   |               |               |               |
|---|---------------|---------------|---------------|
| C | 0.0251069516  | 1.0594210630  | -0.0439421224 |
| C | -1.2277547796 | 0.4403001352  | -0.0334811905 |
| C | -1.2509991031 | -0.9585440993 | -0.0407534196 |
| C | -0.1115928999 | -1.7515368951 | -0.0576966817 |
| C | 1.1167927351  | -1.0950898045 | -0.0678003037 |
| C | 1.1977848677  | 0.3028201616  | -0.0606833397 |
| N | -2.4885678381 | 1.1204555681  | -0.0142386043 |
| N | -2.6179350062 | -1.5195335913 | -0.0264706934 |
| F | 2.2439112424  | -1.7941980953 | -0.0843790630 |
| F | 2.3782189709  | 0.9010847807  | -0.0697778105 |
| F | 0.0969222617  | 2.3868422160  | -0.0371822107 |
| H | -0.1353240420 | -2.8364053222 | -0.0629699383 |
| H | -2.8162567530 | -2.0948012537 | 0.8018455940  |
| H | -3.2200460809 | -0.6479526417 | -0.0076715308 |
| H | -2.8421130581 | -2.0750541592 | -0.8615425673 |
| H | -2.5861930782 | 1.7199792849  | 0.8063699634  |
| H | -2.6113185077 | 1.7195475844  | -0.8319134320 |

**2C'****X****Y****Z**

E = -441.064374 a.u.

|   |               |               |               |
|---|---------------|---------------|---------------|
| C | 0.2098173047  | 2.0995666818  | -0.0407519947 |
| C | -1.0713615981 | 1.4165418049  | 0.0260007031  |
| C | -1.1475279814 | 0.0611045916  | 0.0784070936  |
| C | 0.0344532204  | -0.7376273034 | 0.0686780000  |
| C | 1.3745702864  | -0.0479174253 | -0.0004428682 |
| C | 1.3763009713  | 1.4154985768  | -0.0536543892 |
| H | -1.9914859745 | 1.9940220741  | 0.0350489053  |
| F | -2.3072030393 | -0.6012854682 | 0.1420293723  |
| N | -0.0111703638 | -2.0425748107 | 0.1176860619  |
| N | 2.3787929889  | -0.8430948891 | -0.0048485624 |
| H | 0.2026229542  | 3.1838631782  | -0.0801079211 |
| H | 2.3361762438  | 1.9204122133  | -0.1029852487 |
| H | 3.2798811998  | -0.3553511012 | -0.0523125925 |
| H | 0.8676505785  | -2.5625677841 | 0.1074958398  |
| H | -0.8957470012 | -2.5411859295 | 0.1639069587  |

**2C''****X****Y****Z**

E = -441.068991 a.u.

|   |               |               |               |
|---|---------------|---------------|---------------|
| C | 1.2340997856  | 1.4969556566  | 0.0093480633  |
| C | -0.0015223781 | 2.0918248156  | -0.0501710003 |
| C | -1.2531879241 | 1.3707500316  | -0.0520413828 |
| C | -1.2215875564 | 0.0239904684  | 0.0075702850  |
| C | 0.0426325712  | -0.7306444791 | 0.0740450264  |
| C | 1.3143434310  | 0.0826713072  | 0.0733725653  |
| F | -2.3139527817 | -0.7254355994 | 0.0116649150  |
| N | 0.1598813664  | -1.9999268127 | 0.1315570057  |
| N | 2.4380469977  | -0.5934260664 | 0.1336487776  |
| H | -2.1961964989 | 1.9041347636  | -0.1003781782 |
| H | -0.0522346271 | 3.1762339642  | -0.0993943457 |
| H | 2.1402191080  | 2.0941655685  | 0.0077079698  |
| H | 3.3456860308  | -0.1387118895 | 0.1379060306  |
| H | 2.3967045720  | -1.6121802002 | 0.1766828501  |
| H | -0.7468160962 | -2.4815635284 | 0.1274644182  |

**4C'****X****Y****Z**

E = -540.258772 a.u.

|   |               |               |              |
|---|---------------|---------------|--------------|
| C | 1.3765303199  | 1.4178950863  | 0.0000000000 |
| C | 0.2175084885  | 2.1084293483  | 0.0000000000 |
| C | -1.0507236526 | 1.4063031124  | 0.0000000000 |
| C | -1.1513150040 | 0.0384072105  | 0.0000000000 |
| C | 0.0257856869  | -0.7427242900 | 0.0000000000 |
| C | 1.3682404815  | -0.0510320421 | 0.0000000000 |
| F | -2.3306394614 | -0.5841549481 | 0.0000000000 |
| N | -0.0096037121 | -2.0535692988 | 0.0000000000 |
| N | 2.3764181035  | -0.8374791057 | 0.0000000000 |
| F | -2.1442841941 | 2.1288432728  | 0.0000000000 |
| H | 0.1795614986  | 3.1932762815  | 0.0000000000 |
| H | 2.3380843200  | 1.9220305454  | 0.0000000000 |
| H | 3.2763281654  | -0.3454874359 | 0.0000000000 |
| H | 0.8727234835  | -2.5652556647 | 0.0000000000 |
| H | -0.8886145238 | -2.5624820720 | 0.0000000000 |

#### 4C''

**X**

**Y**

**Z**

E = -540.255757 a.u.

|   |               |               |              |
|---|---------------|---------------|--------------|
| C | -1.5484964113 | -0.4825456510 | 0.0000000000 |
| C | -0.9007568857 | -1.7494831023 | 0.0000000000 |
| C | 0.4667399088  | -1.7914979375 | 0.0000000000 |
| C | 1.2985931451  | -0.6117503962 | 0.0000000000 |
| C | 0.7391877429  | 0.6214830089  | 0.0000000000 |
| C | -0.7164798198 | 0.7794472101  | 0.0000000000 |
| F | 2.6108657915  | -0.7830553257 | 0.0000000000 |
| F | 1.4513946571  | 1.7371477375  | 0.0000000000 |
| N | -1.3537154952 | 1.8869270095  | 0.0000000000 |
| N | -2.8487340154 | -0.3229793326 | 0.0000000000 |
| H | 0.9863406812  | -2.7463809388 | 0.0000000000 |
| H | -1.4853532019 | -2.6635069847 | 0.0000000000 |
| H | -3.4947967757 | -1.1066347026 | 0.0000000000 |
| H | -3.2238868515 | 0.6275402710  | 0.0000000000 |
| H | -0.7329024702 | 2.7042891345  | 0.0000000000 |

#### 5C'

**X**

**Y**

**Z**

E = -540.258692 a.u.

|   |               |               |              |
|---|---------------|---------------|--------------|
| C | 0.2920306945  | 1.3947956233  | 0.0000000000 |
| C | -1.1518445097 | 1.2128099230  | 0.0000000000 |
| C | -1.6520647317 | -0.0423350998 | 0.0000000000 |
| C | -0.8237084401 | -1.2371146618 | 0.0000000000 |

|   |               |               |              |
|---|---------------|---------------|--------------|
| C | 0.5265673013  | -1.1309841157 | 0.0000000000 |
| C | 1.1569110998  | 0.1557742632  | 0.0000000000 |
| H | -1.3057930639 | -2.2105371180 | 0.0000000000 |
| F | 1.3381336502  | -2.1891054333 | 0.0000000000 |
| N | 2.4541695881  | 0.2825898965  | 0.0000000000 |
| N | 0.9618317672  | 2.4887493494  | 0.0000000000 |
| F | -2.9560104801 | -0.2703510818 | 0.0000000000 |
| H | -1.8058481076 | 2.0779856603  | 0.0000000000 |
| H | 0.3726732093  | 3.3276955214  | 0.0000000000 |
| H | 2.8484248456  | 1.2262880177  | 0.0000000000 |
| H | 3.0698101453  | -0.5271215122 | 0.0000000000 |

### 5C''

**X**

**Y**

**Z**

E = -540.270304 a.u.

|   |               |               |              |
|---|---------------|---------------|--------------|
| C | -1.1486941610 | -0.1641149901 | 0.0000000000 |
| C | -0.2188573936 | -1.3546588929 | 0.0000000000 |
| C | 1.1743788479  | -1.1514460401 | 0.0000000000 |
| C | 1.6358515146  | 0.1446855190  | 0.0000000000 |
| C | 0.8197031896  | 1.3352099677  | 0.0000000000 |
| C | -0.5162069218 | 1.1710198588  | 0.0000000000 |
| N | -0.7975211583 | -2.5361257959 | 0.0000000000 |
| F | 2.9317257156  | 0.3537543918  | 0.0000000000 |
| F | -1.3624229203 | 2.1860807857  | 0.0000000000 |
| N | -2.4016043392 | -0.3957876468 | 0.0000000000 |
| H | 1.2931383856  | 2.3109532231  | 0.0000000000 |
| H | 1.8784007067  | -1.9763214669 | 0.0000000000 |
| H | -0.2684231584 | -3.4018133439 | 0.0000000000 |
| H | -1.8161990327 | -2.5818404227 | 0.0000000000 |
| H | -2.9662692748 | 0.4614048533  | 0.0000000000 |

### 7C'

**X**

**Y**

**Z**

E = -639.447284 a.u.

|   |               |               |              |
|---|---------------|---------------|--------------|
| C | 1.2158586420  | 1.2111753097  | 0.0000000000 |
| C | -0.1293968391 | 1.7794970898  | 0.0000000000 |
| C | -1.1953422160 | 0.9557198460  | 0.0000000000 |
| C | -1.0477626006 | -0.5001439558 | 0.0000000000 |
| C | 0.1817718483  | -1.0988093785 | 0.0000000000 |
| C | 1.3499676628  | -0.2948672006 | 0.0000000000 |
| F | -2.1395866409 | -1.2154344123 | 0.0000000000 |
| F | 0.3180125898  | -2.4233346909 | 0.0000000000 |



### 3. References

1. A.E. Reed, L.A. Curtiss, F. Weinhold, *Chem. Rev.*, 1988, **88**, 6, 899–926. <https://doi.org/10.1021/cr00088a005>
2. M. W. Schmidt, K. K. Baldrige, J. A. Boatz, S. T. Elbert, M. S. Cordon, J. J. Jensen, S. Koseki, N. Matsunaga, K. A. Nguyen, S. Su, T. L. Windus, M. Dupuis, J. A. Montgomery, *J. Comput. Chem.*, 1993, **14**, 1347–1363.
3. G. Schaftenaar, J. H. Noordik, *J. Comput. Aided Mol. Des.*, 2000, **14**, 123–134.
4. F. Neese, F. Wennmohs, U. Becker, C. Riplinger, *J. Chem. Phys.*, 2020, **152**, 224108. <https://doi.org/10.1063/5.0004608>



4. **Fig. S2.** Absorption (1) and emission (2) spectra of 2,3-diaminophenazines.

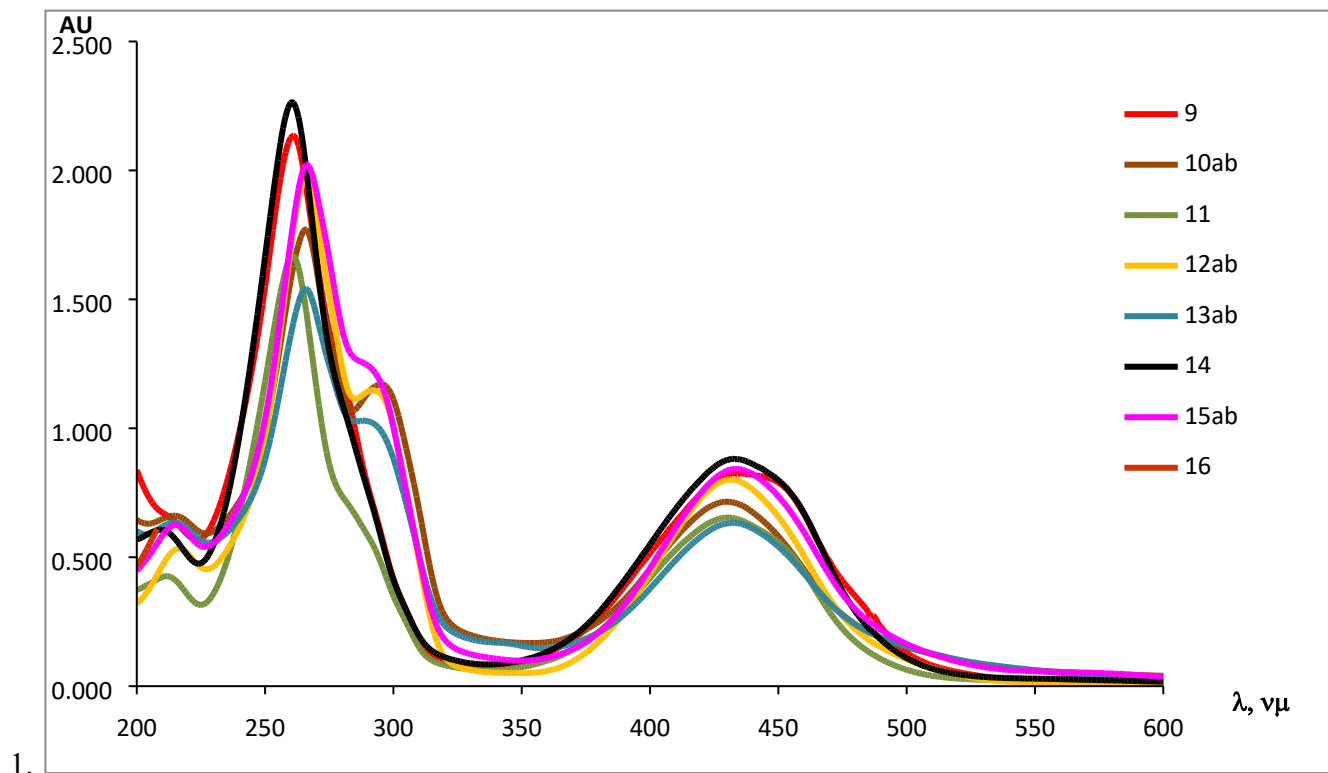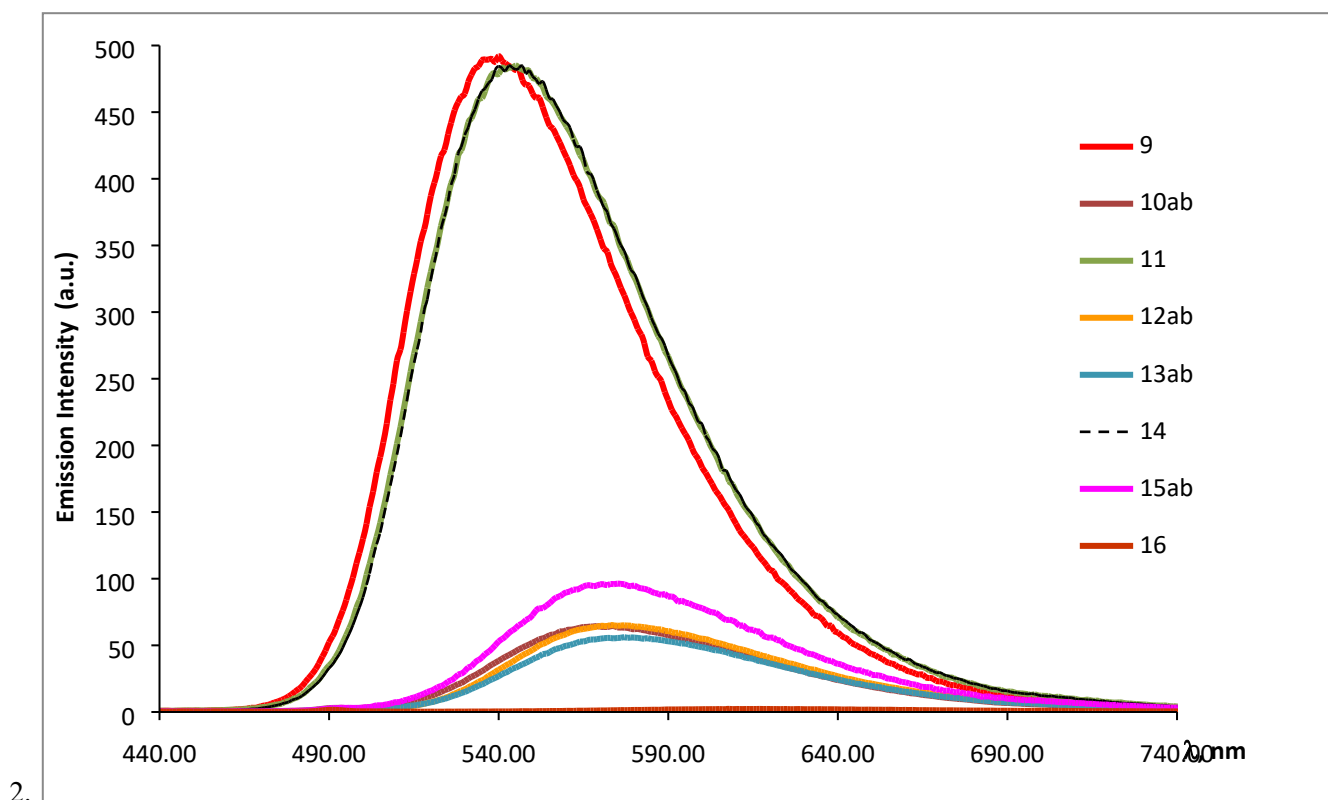

5. Quantum chemical calculations of relative values of chemical shifts of signals in  $^1\text{H}$ ,  $^{19}\text{F}$ ,  $^{13}\text{C}$ ,  $^{15}\text{N}$  spectra**Table S2.** Calculated and experimental  $^1\text{H}$ ,  $^{13}\text{C}$ ,  $^{15}\text{N}$  and  $^{19}\text{F}$  chemical shifts ( $\delta$ , ppm). Difference ( $\Delta$ ) in chemical shift for **a** and **b** isomers.

|                         |      | Nuclear and position |         |         |         |         |         |         |         |           |           |           |             |
|-------------------------|------|----------------------|---------|---------|---------|---------|---------|---------|---------|-----------|-----------|-----------|-------------|
|                         |      | C1                   | C2      | C3      | C4      | C6      | C7      | C8      | C9      | C4a       | C5a       | C9a       | C10a        |
|                         |      | aC1-bC1              | aC2-bC2 | aC3-bC3 | aC4-bC4 | aC6-bC9 | aC7-bC8 | aC8-bC7 | aC9-bC6 | aC4a-bC4a | aC5a-bC9a | aC9a-bC5a | aC10a-bC10a |
|                         |      | $\Delta$             |         |         |         |         |         |         |         |           |           |           |             |
| <b>10a</b>              | calc | 142.42               | 132.16  | 145.21  | 102.98  | 156.93  | 112.34  | 126.57  | 124.3   | 137.64    | 131.98    | 139.72    | 130.63      |
| <b>10b</b>              | calc | 142.86               | 131.81  | 145.56  | 102.48  | 123.87  | 127.3   | 111.82  | 157.36  | 138.77    | 141.06    | 130.63    | 129.54      |
| <b>10a</b>              | exp  | 138.34               | 130.45  | 144.69  | 98.11   | 156.28  | 110.67  | 125.75  | 124.27  | 139.48    | 131.13    | 140.42    | 131.93      |
| <b>10b</b>              | exp  | 138.62               | 130.34  | 144.86  | 97.81   | 123.97  | 126.28  | 110.3   | 156.6   | 140.22    | 141.51    | 130.07    | 131.21      |
| $\Delta$ <b>10a-10b</b> | calc | -0.44                | 0.35    | -0.35   | 0.5     | -0.43   | 0.52    | -0.73   | 0.43    | -1.13     | 1.35      | -1.34     | 1.09        |
| $\Delta$ <b>10a-10b</b> | exp  | -0.28                | 0.11    | -0.17   | 0.3     | -0.32   | 0.37    | -0.53   | 0.3     | -0.74     | 1.06      | -1.09     | 0.72        |
| <b>12a</b>              | calc | 142.61               | 131.85  | 146.04  | 102.37  | 143.66  | 149.12  | 117.89  | 124.74  | 137.93    | 132.45    | 136.33    | 130.19      |
| <b>12b</b>              | calc | 142.39               | 132.73  | 145.19  | 102.83  | 124.25  | 118.56  | 148.72  | 144.05  | 138.2     | 137.67    | 131.02    | 129.76      |
| <b>12a</b>              | exp  | 138.34               | 130.29  | 145.56  | 97.63   | 142.31  | 147.02  | 116.91  | 124.68  | 139.72    | 131.63    | 136.76    | 131.63      |
| <b>12b</b>              | exp  | 138.32               | 131.24  | 144.65  | 97.89   | 124.35  | 117.45  | 146.75  | 142.67  | 139.82    | 137.82    | 130.54    | 131.4       |
| $\Delta$ <b>12a-12b</b> | calc | 0.22                 | -0.88   | 0.85    | -0.46   | -0.39   | 0.4     | -0.67   | 0.49    | -0.27     | 1.43      | -1.34     | 0.43        |
| $\Delta$ <b>12a-12b</b> | exp  | 0.02                 | -0.95   | 0.91    | -0.26   | -0.36   | 0.27    | -0.54   | 0.33    | -0.1      | 1.09      | -1.06     | 0.23        |
| <b>13a</b>              | calc | 141.94               | 133.01  | 144.8   | 103.31  | 157.33  | 104.85  | 160.48  | 107.7   | 137.17    | 129.68    | 139.19    | 131.13      |
| <b>13b</b>              | calc | 143.04               | 131.46  | 146.33  | 101.92  | 107.4   | 160.95  | 104.24  | 157.8   | 139.34    | 140.62    | 128.33    | 129.17      |
| <b>13a</b>              | exp  | 138.15               | 131.46  | 144.59  | 98.41   | 156.94  | 103.26  | 159.34  | 107.3   | 139.24    | 128.7     | 139.91    | 132.52      |
| <b>13b</b>              | exp  | 138.78               | 130.27  | 145.85  | 97.5    | 106.9   | 159.68  | 102.86  | 157.3   | 140.91    | 141.02    | 127.63    | 131.09      |
| $\Delta$ <b>13a-13b</b> | calc | -1.1                 | 1.55    | -1.53   | 1.39    | -0.47   | 0.61    | -0.47   | 0.3     | -2.17     | 1.35      | -1.43     | 1.96        |
| $\Delta$ <b>13a-13b</b> | exp  | -0.63                | 1.19    | -1.26   | 0.91    | -0.36   | 0.4     | -0.34   | 0.4     | -1.67     | 1.07      | -1.11     | 1.43        |
| <b>15a</b>              | calc | 142.16               | 132.64  | 145.61  | 102.75  | 145.02  | 141.56  | 151.36  | 108.92  | 137.53    | 129.86    | 134.63    | 130.81      |
| <b>15b</b>              | calc | 142.62               | 132.31  | 145.94  | 102.32  | 108.6   | 151.78  | 141.11  | 145.44  | 138.92    | 136.03    | 128.47    | 129.49      |
| <b>15a</b>              | exp  | 138.01               | 130.86  | 145.07  | 97.73   | 143.5   |         | 149.36  | 108.37  | 139.26    | 128.7     | 134.91    | 132.02      |
| <b>15b</b>              | exp  | 138.28               | 130.77  | 145.2   | 97.46   | 107.98  | 149.68  |         | 143.87  | 140.36    | 136.02    | 127.57    | 130.97      |
| $\Delta$ <b>15a-15b</b> | calc | -0.46                | 0.33    | -0.33   | 0.43    | -0.42   | 0.45    | -0.42   | 0.32    | -1.39     | 1.39      | -1.4      | 1.32        |
| $\Delta$ <b>15a-15b</b> | exp  | -0.27                | 0.09    | -0.13   | 0.27    | -0.37   |         | -0.32   | 0.39    | -1.1      | 1.13      | -1.11     | 1.05        |

Continuation of Table S2

|                         |      | Nuclear and position    |                         |         |           |                         |                         |         |                       |                       |                       |                       |         |
|-------------------------|------|-------------------------|-------------------------|---------|-----------|-------------------------|-------------------------|---------|-----------------------|-----------------------|-----------------------|-----------------------|---------|
|                         |      | N2 (2-NH <sub>2</sub> ) | N3 (3-NH <sub>2</sub> ) | N5      | N10       | H2 (2-NH <sub>2</sub> ) | H3 (3-NH <sub>2</sub> ) | H4      | H6 or F6              | H7 or F7              | H8 or F8              | H9 or F9              | F1      |
|                         |      | $\Delta$                |                         |         |           |                         |                         |         |                       |                       |                       |                       |         |
|                         |      | aN2-bN2                 | aN3-bN3                 | aN5-bN5 | aN10-bN10 | aH2-bH2                 | aH3-bH3                 | aH4-bH4 | aH6-bH9 or<br>aF6-bF9 | aH7-bH8 or<br>aF7-bF8 | aH8-bH7 or<br>aF8-bF7 | aH9-bH6 or<br>aF9-bF6 | aF1-bF1 |
| <b>10a</b>              | calc | 58.33                   | 72.52                   | 289.31  | 290.31    | 4.69 and 3.77           | 4.33 and 4.55           | 7.28    | 32.83                 | 7.45                  | 7.73                  | 7.96                  | 4.25    |
| <b>10b</b>              | calc | 57.70                   | 73.05                   | 298.92  | 281       | 3.71 and 4.68           | 4.56 and 4.39           | 7.22    | 7.89                  | 7.74                  | 7.45                  | 33.26                 | 4.98    |
| <b>10a</b>              | exp  | 58.8                    | 71                      | 289.3   | 290.4     | 6.39                    | 6.67                    | 6.85    | 35.84                 | 7.42                  | 7.55                  | 7.83                  | 6.94    |
| <b>10b</b>              | exp  | 58.5                    | 71.3                    | 300.2   |           | 6.38                    | 6.68                    | 6.82    | 7.75                  | 7.56                  | 7.41                  | 36.22                 | 7.12    |
| $\Delta$ <b>10a-10b</b> | calc | 0.63                    | -0.53                   | -9.61   | 9.31      | 0.04                    | -0.04                   | 0.06    | -0.43                 | 0                     | -0.01                 | 0.07                  | -0.73   |
| $\Delta$ <b>10a-10b</b> | exp  | 0.3                     | -0.3                    | -10.9   |           | 0.01                    | -0.01                   | 0.03    | -0.38                 | 0.01                  | -0.01                 | 0.08                  | -0.18   |
| <b>12a</b>              | calc | 57.93                   | 72.82                   | 285.63  | 292.26    | 4.67 and 3.73           | 4.41 and 4.60           | 7.25    | 7.45                  | 26.42                 | 7.62                  | 7.98                  | 4.9     |
| <b>12b</b>              | calc | 59.13                   | 72.73                   | 300.93  | 277.39    | 3.81 and 4.72           | 4.55 and 4.33           | 7.22    | 7.91                  | 7.63                  | 25.36                 | 7.91                  | 4.35    |
| <b>12a</b>              | exp  | 58.8                    | 73.2                    | 284.9   | 291.6     | 6.38                    | 6.79                    | 6.84    | 8.53                  | 23.45                 | 7.68                  | 7.87                  | 7.08    |
| <b>12b</b>              | exp  | 60.7                    | 71.3                    | 301.4   |           | 6.50                    | 6.67                    | 6.82    | 7.8                   | 7.69                  | 22.95                 | 9.38                  | 6.63    |
| $\Delta$ <b>12a-12b</b> | calc | -1.2                    | 1.09                    | -15.3   | 14.87     | -0.07                   | 0.07                    | 0.03    | -0.46                 | 1.06                  | -0.01                 | 0.07                  | 0.55    |
| $\Delta$ <b>12a-12b</b> | exp  | -1.9                    | 1.9                     | -16.5   |           | -0.12                   | 0.06                    | 0.02    | -0.85                 | 0.50                  | -0.01                 | 0.07                  | 0.45    |
| <b>13a</b>              | calc | 59.7                    | 72.12                   | 291.25  | 286.84    | 4.73 and 3.85           | 4.27 and 4.53           | 7.27    | 39.27                 | 7.28                  | 53.47                 | 7.57                  | 3.71    |
| <b>13b</b>              | calc | 57.21                   | 74.34                   | 295.33  | 282.81    | 3.66 and 4.65           | 4.61 and 4.47           | 7.16    | 7.48                  | 54.28                 | 7.26                  | 39.74                 | 5.69    |
| <b>13a</b>              | exp  | 61                      | 70.8                    | 290.5   |           | 6.52                    | 6.66                    | 6.84    | 40.41                 | 7.58                  | 51.81                 | 7.62                  | 6.63    |
| <b>13b</b>              | exp  | 58.5                    | 73.5                    | 296.8   |           | 6.37                    | 6.80                    | 6.79    | 7.52                  | 52.43                 | 7.56                  | 40.8                  | 7.36    |
| $\Delta$ <b>13a-13b</b> | calc | 2.49                    | -2.22                   | -4.08   | 4.03      | 0.14                    | -0.14                   | 0.11    | -0.47                 | 0.02                  | -0.81                 | 0.09                  | -1.98   |
| $\Delta$ <b>13a-13b</b> | exp  | 2.5                     | -2.7                    | -6.3    |           | 0.15                    | -0.14                   | 0.05    | -0.39                 | 0.02                  | -0.62                 | 0.1                   | -0.73   |
| <b>15a</b>              | calc | 59.23                   | 73.37                   | 287.75  | 288.79    | 4.71 and 3.81           | 4.36 and 4.58           | 7.25    | 12.97                 | 6.19                  | 30.97                 | 7.71                  | 4.44    |
| <b>15b</b>              | calc | 58.56                   | 73.93                   | 297.32  | 279.52    | 3.75 and 4.70           | 4.59 and 4.41           | 7.18    | 7.62                  | 31.78                 | 5.14                  | 13.49                 | 5.13    |
| <b>15a</b>              | exp  | 60.4                    | 72.5                    | 286.3   |           | 6.49                    | 6.76                    | 6.82    | 13.03                 | 2.71                  | 27.52                 | 7.87                  | 6.76    |
| <b>15b</b>              | exp  | 60.2                    | 72.9                    | 297.9   |           | 6.48                    | 6.78                    | 6.78    | 7.76                  | 28.19                 | 2.17                  | 13.53                 | 6.76    |
| $\Delta$ <b>15a-15b</b> | calc | 0.67                    | -0.56                   | -9.57   | 9.27      | 0.04                    | -0.03                   | 0.07    | -0.52                 | 1.05                  | -0.81                 | 0.09                  | -0.69   |
| $\Delta$ <b>15a-15b</b> | exp  | 0.2                     | -0.4                    | -11.6   |           | 0.01                    | -0.02                   | 0.04    | -0.5                  | 0.54                  | -0.67                 | 0.11                  | 0       |

6.  $^1\text{H}$ ,  $^{19}\text{F}$  and  $^{13}\text{C}$  NMR spectra of the synthesized **DAPs 9-16**

$^1\text{H}$  NMR spectrum of **9** (DMSO- $d_6$ ), Bruker AV-600 ( $^1\text{H}$  – 600.30 MHz)

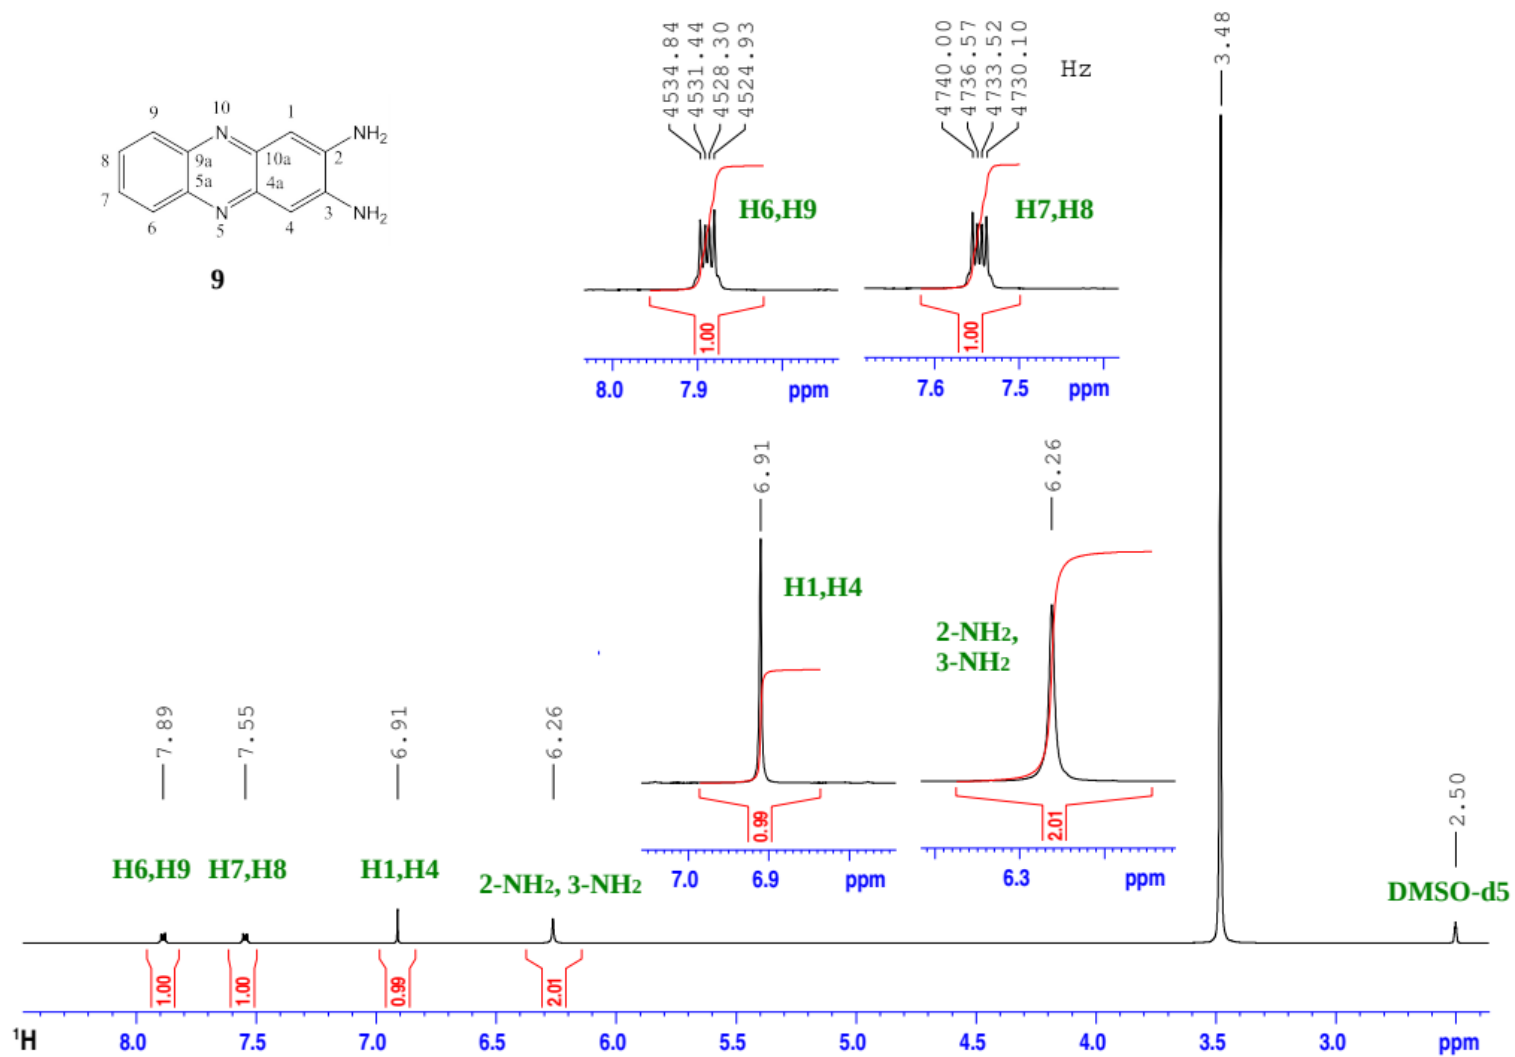

$^{13}\text{C}\{^1\text{H}\}$  NMR spectrum of **9** (DMSO- $d_6$ ), Bruker AV-600 ( $^1\text{H}$  – 600.30,  $^{13}\text{C}$  – 150.95 MHz)

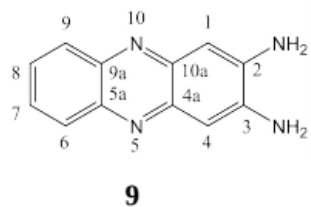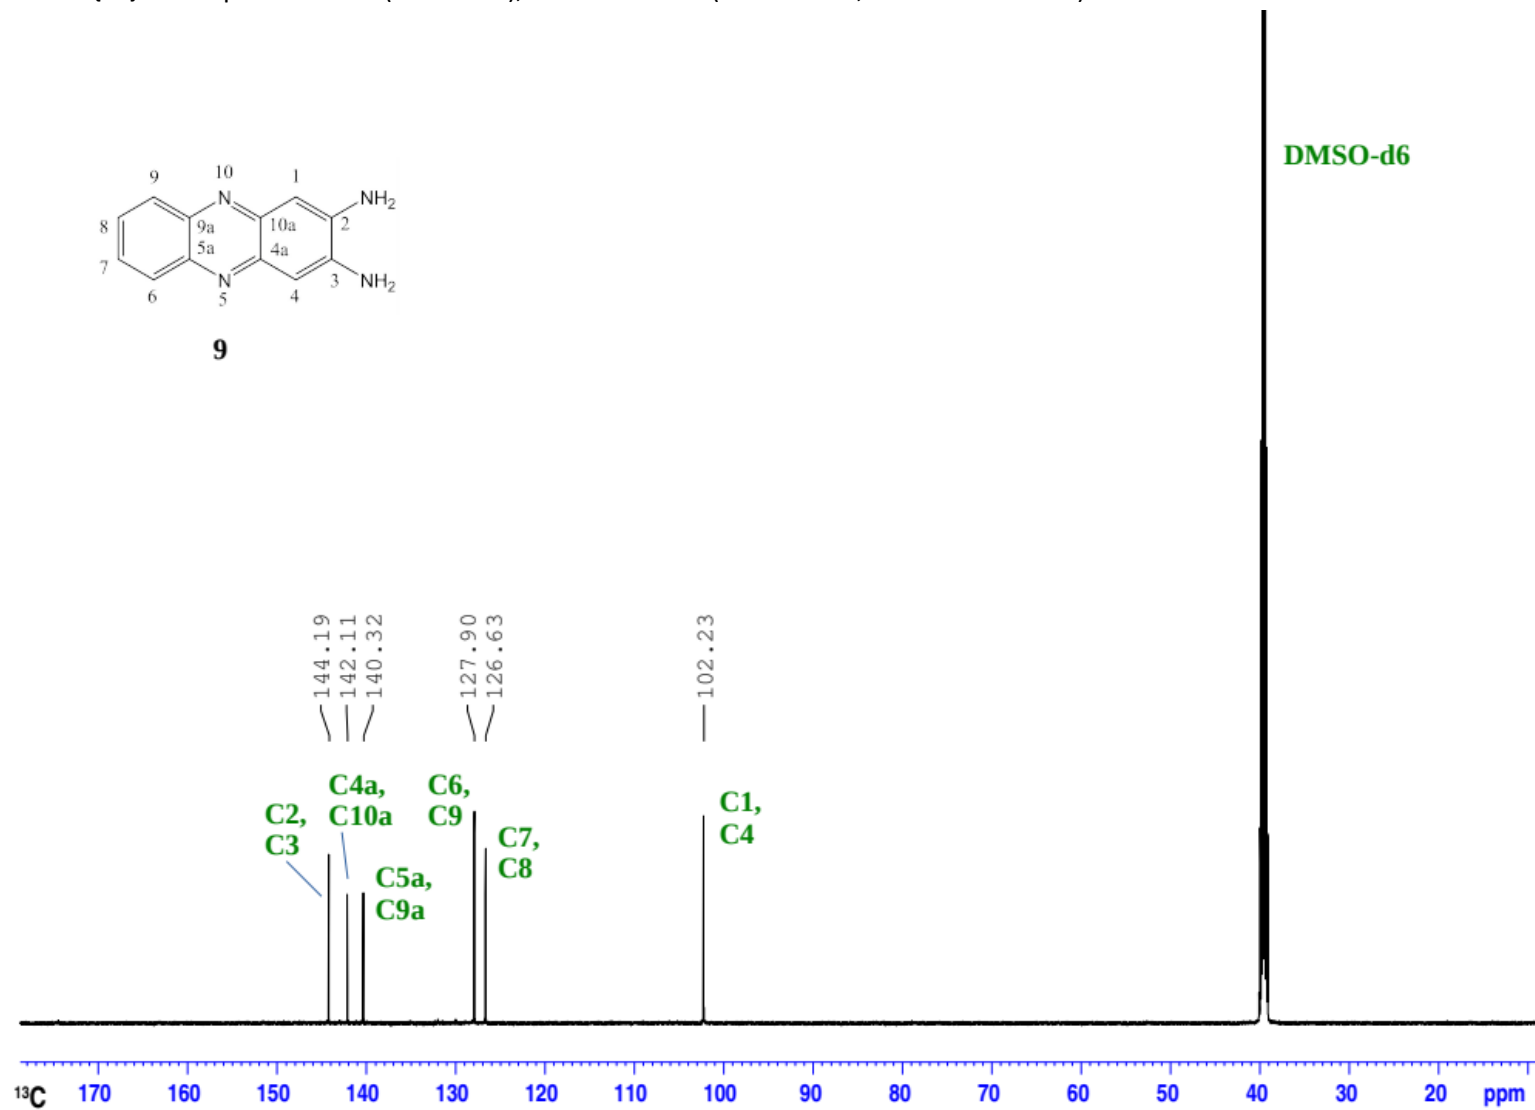

$^1\text{H}$ - $^{13}\text{C}$  correlation NMR spectra of **9** (DMSO- $d_6$ ), Bruker AV-600 ( $^1\text{H}$  – 600.30,  $^{13}\text{C}$  – 150.95 MHz)

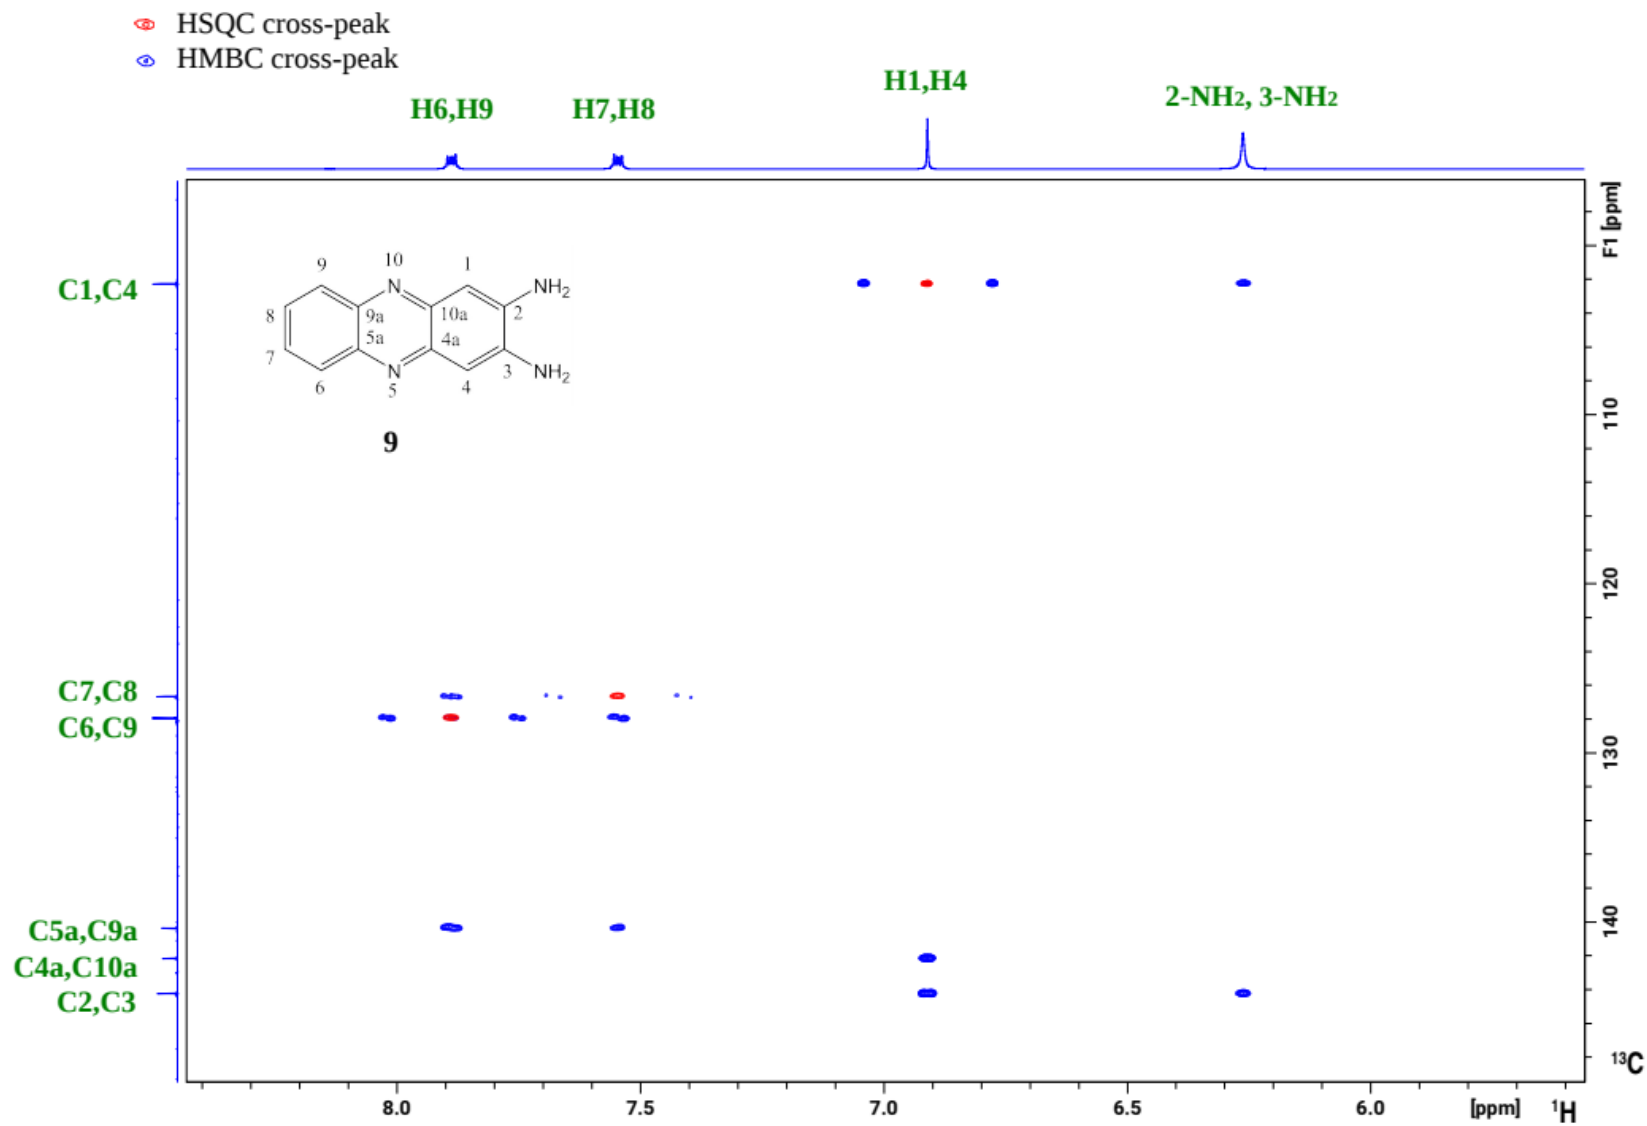

$^1\text{H}$ - $^{15}\text{N}$  HMBC spectrum of **9** (DMSO- $d_6$ ), Bruker AV-600 ( $^1\text{H}$  – 600.30,  $^{15}\text{N}$  – 60.83 MHz)

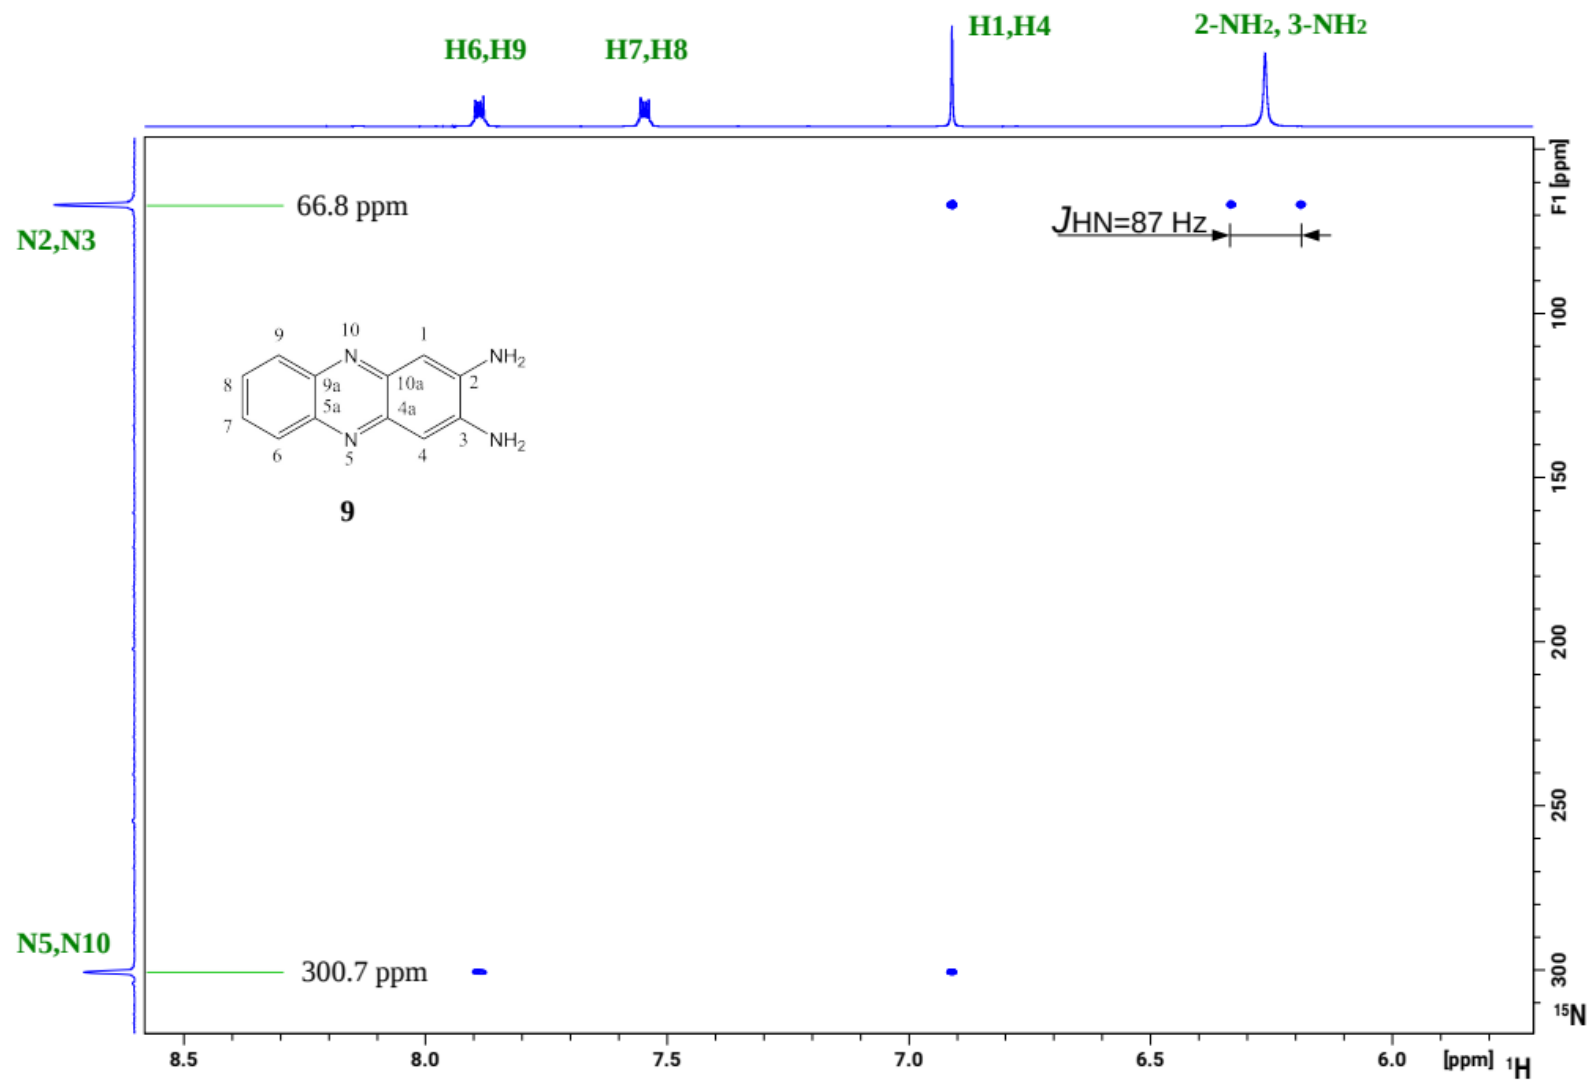

<sup>1</sup>H NMR spectrum of **10a** and **10b** (DMSO-d<sub>6</sub>), Bruker AV-400 (<sup>1</sup>H – 400.13 MHz)

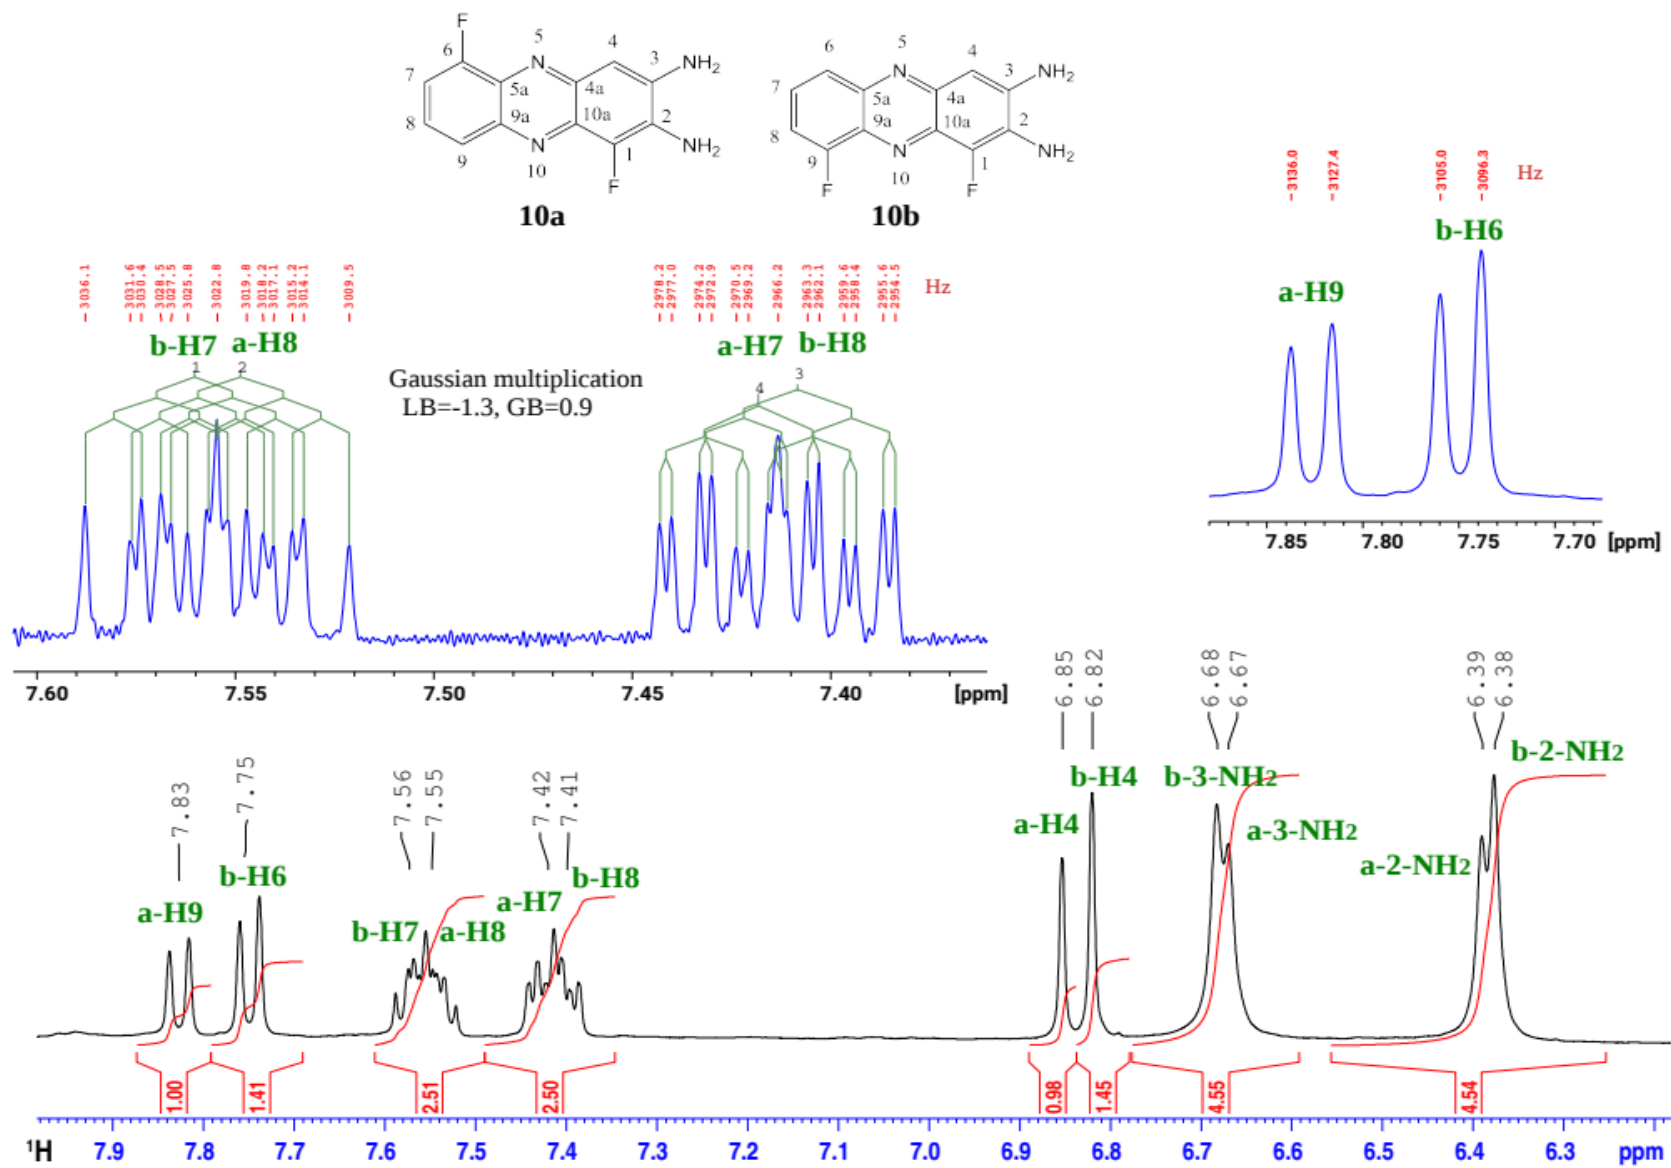



<sup>19</sup>F NMR spectrum of **10a** and **10b** (DMSO-d<sub>6</sub>), Bruker AV-400 (<sup>19</sup>F – 376.50, <sup>1</sup>H – 400.13 MHz)

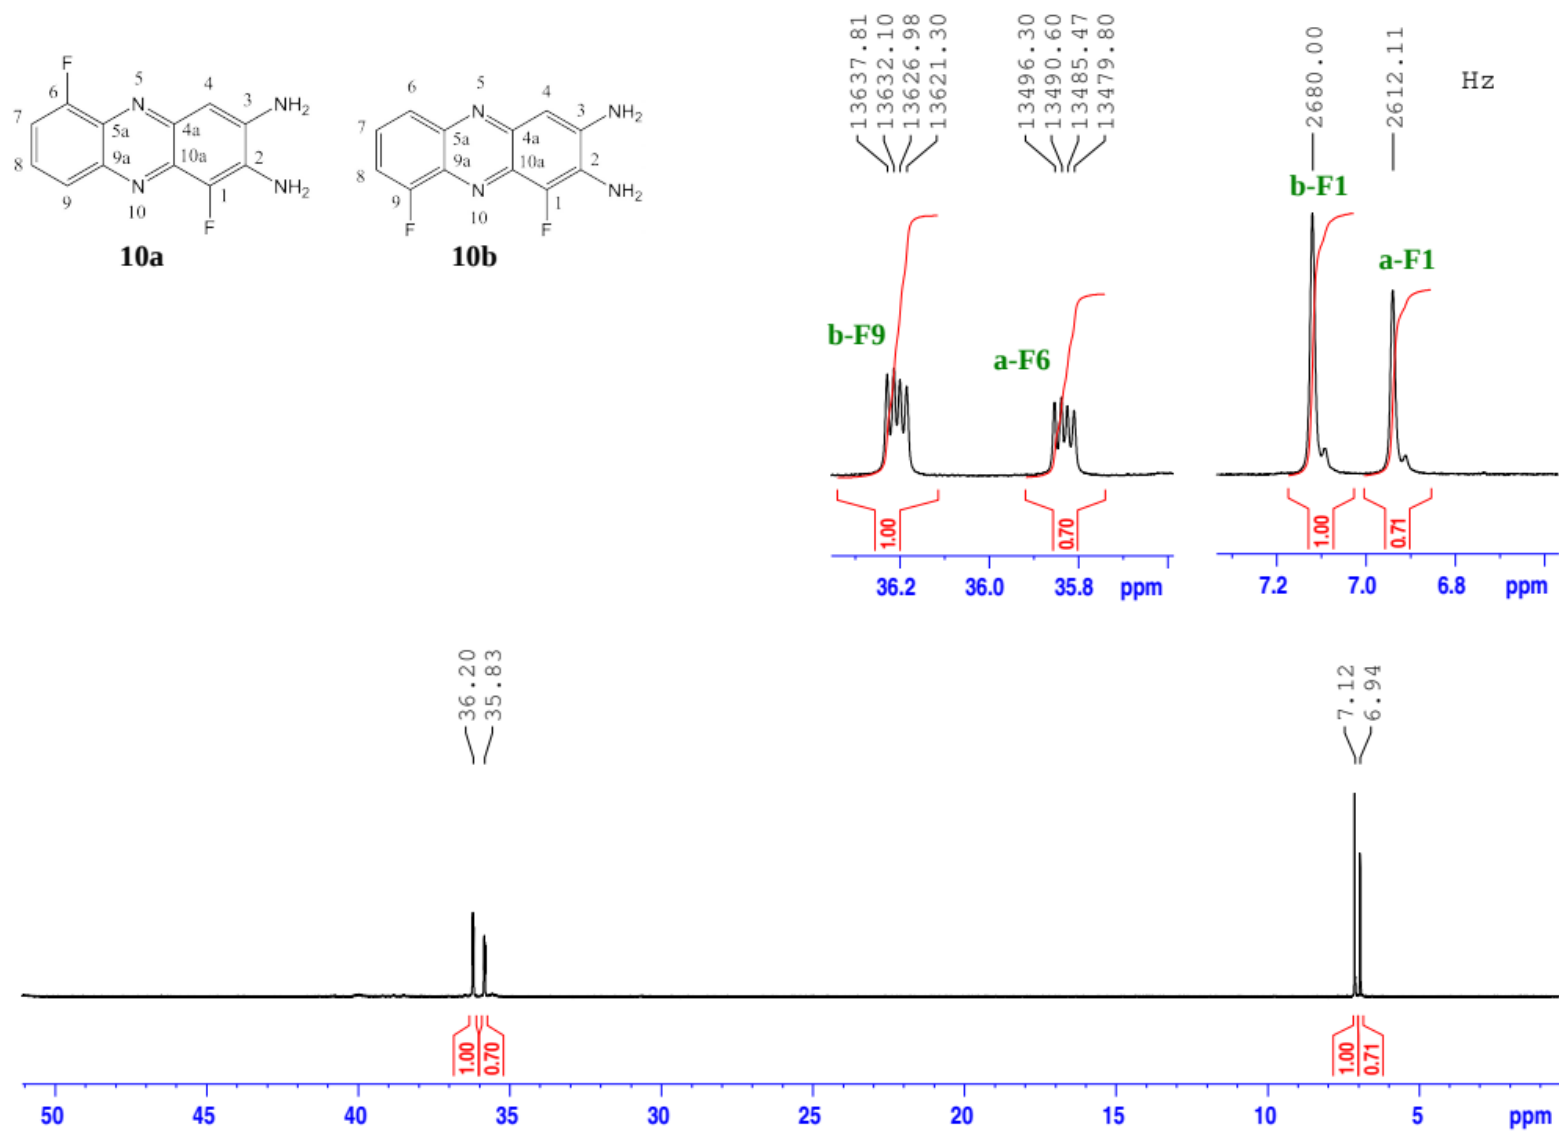

$^{19}\text{F}\{^1\text{H}\}$  NMR spectrum of **10a** and **10b** (DMSO- $d_6$ ), Bruker AV-400 ( $^{19}\text{F}$  – 376.50,  $^1\text{H}$  – 400.13 MHz)

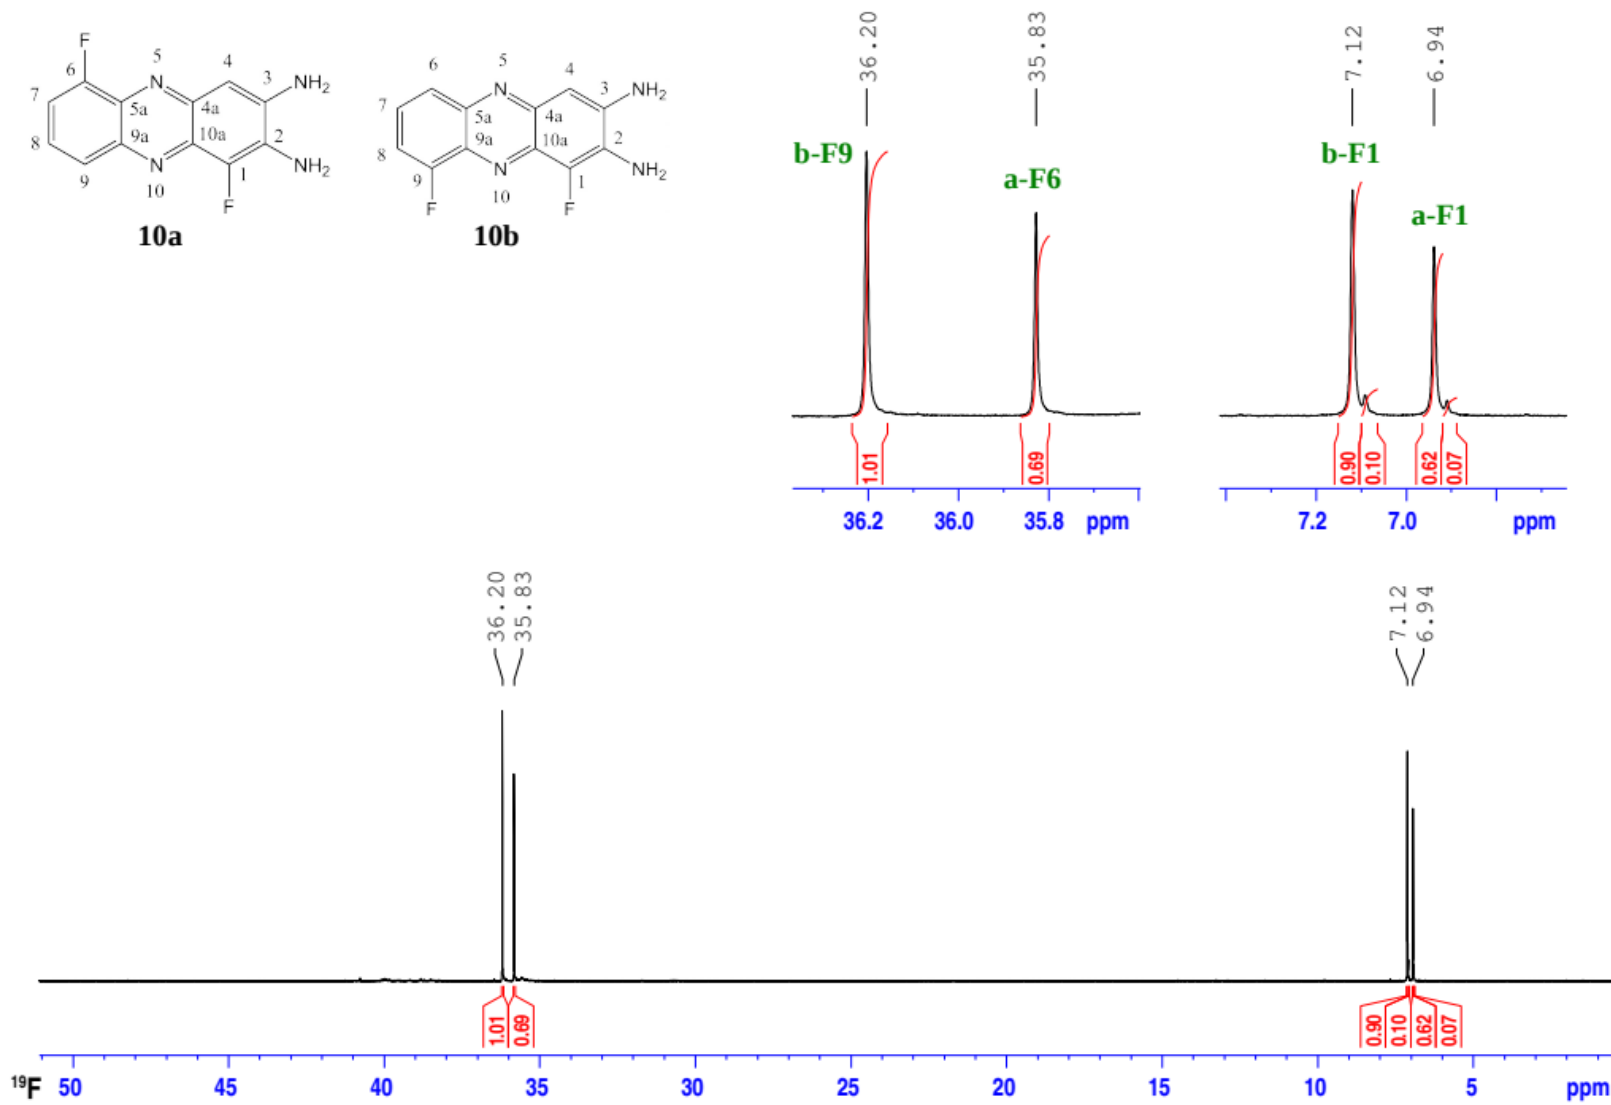

Cross-peaks in  $^{19}\text{F}$ - $^{19}\text{F}$  COSY spectrum of **10a** and **10b** (DMSO-d<sub>6</sub>), Bruker AV-400 ( $^{19}\text{F}$  – 376.50)

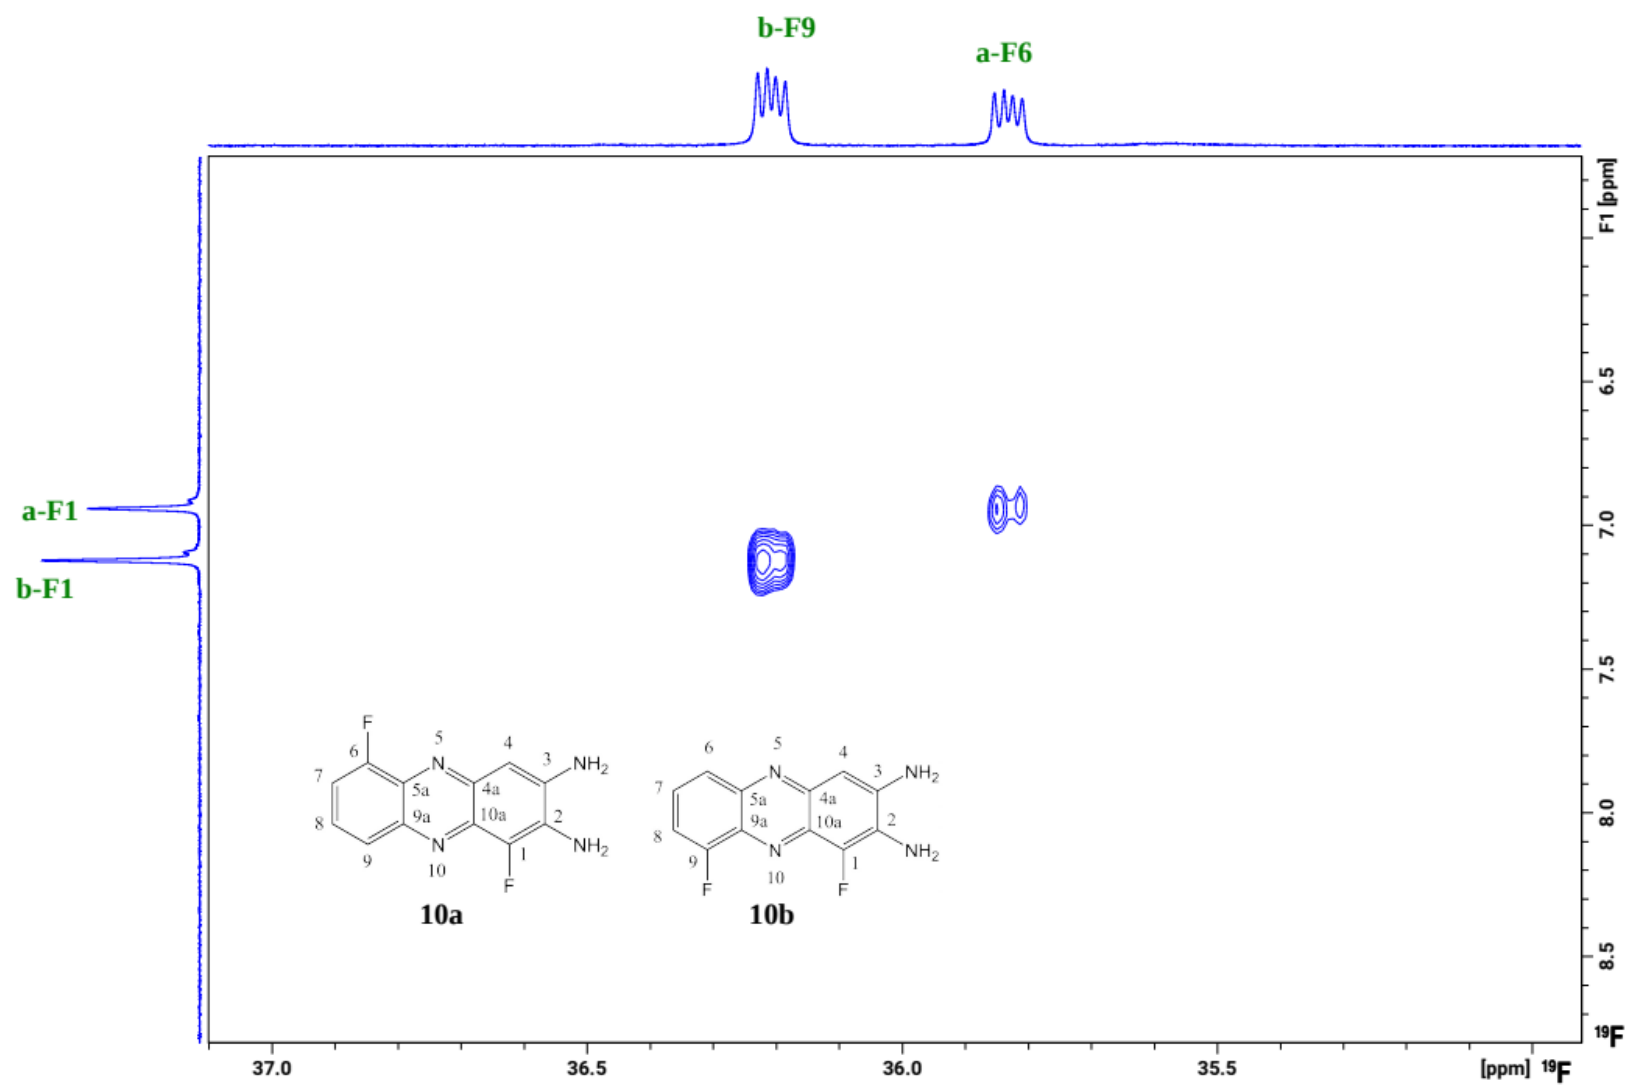

$^{13}\text{C}\{^1\text{H}\}$  NMR spectrum of **10a** and **10b** (DMSO- $d_6$ ), Bruker AV-600 ( $^1\text{H}$  – 600.30,  $^{13}\text{C}$  – 150.95 MHz)

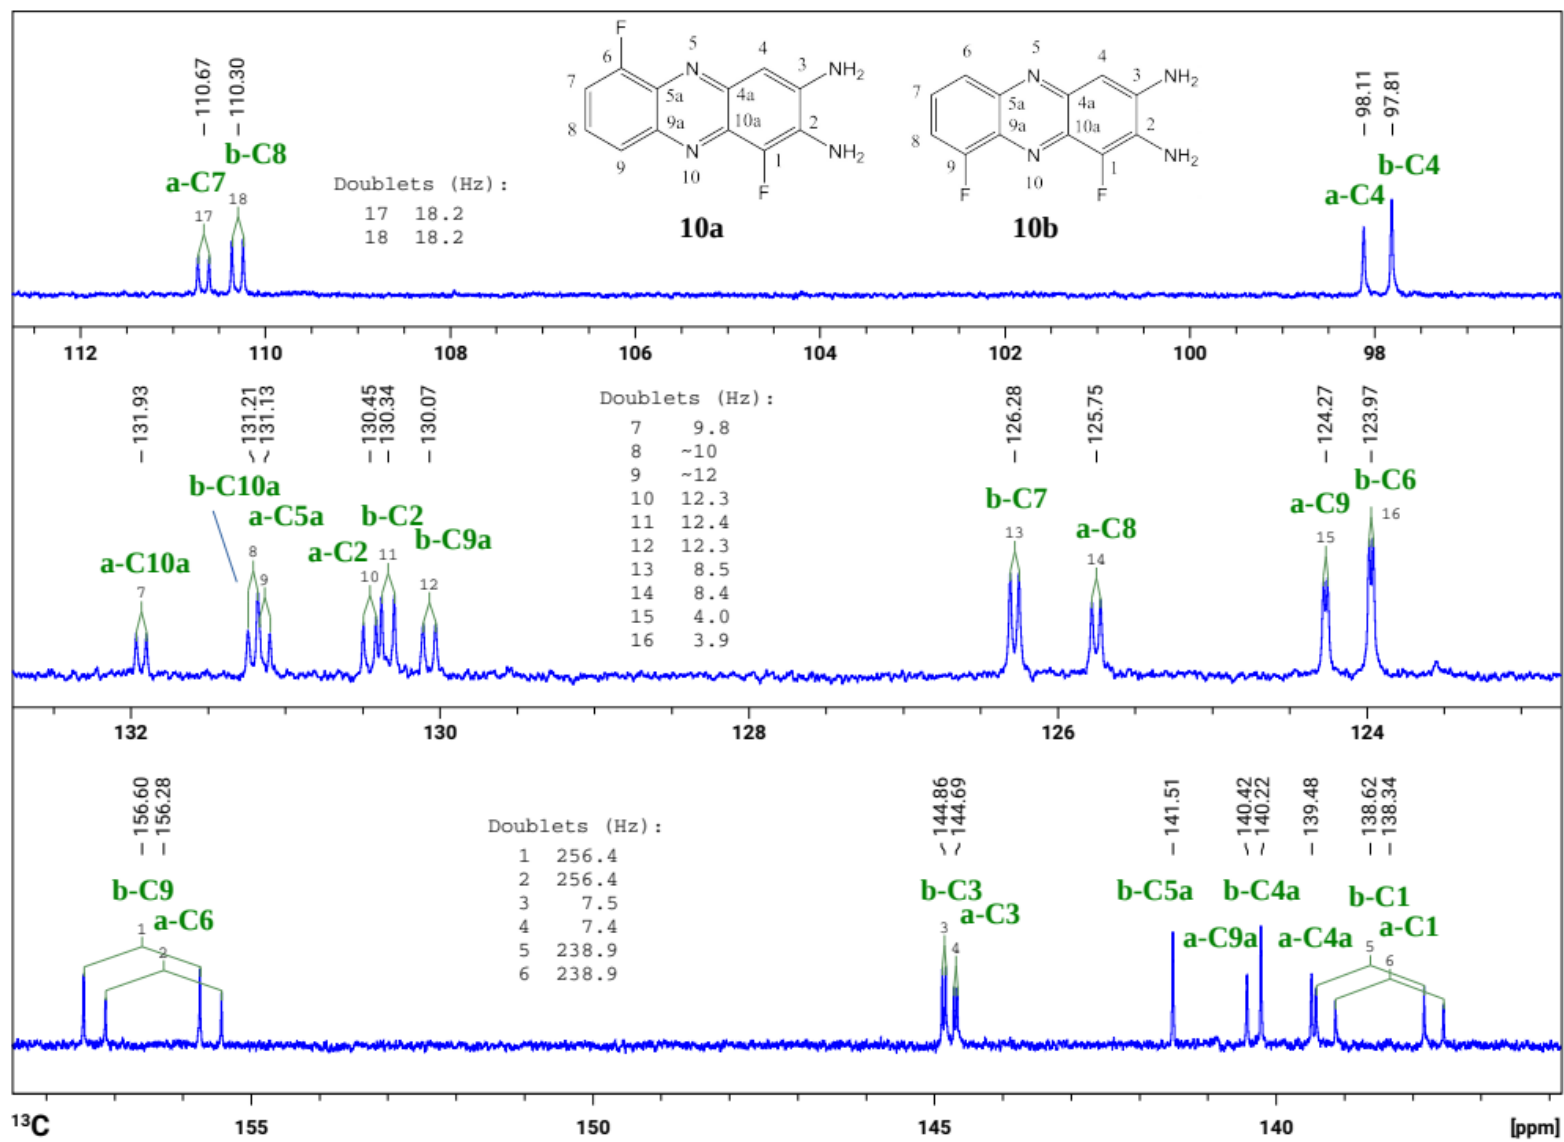

$^1\text{H}$ - $^{13}\text{C}$  correlation NMR spectra of **10a** and **10b** (DMSO- $d_6$ ), Bruker AV-600 ( $^1\text{H}$  – 600.30,  $^{13}\text{C}$  – 150.95 MHz)

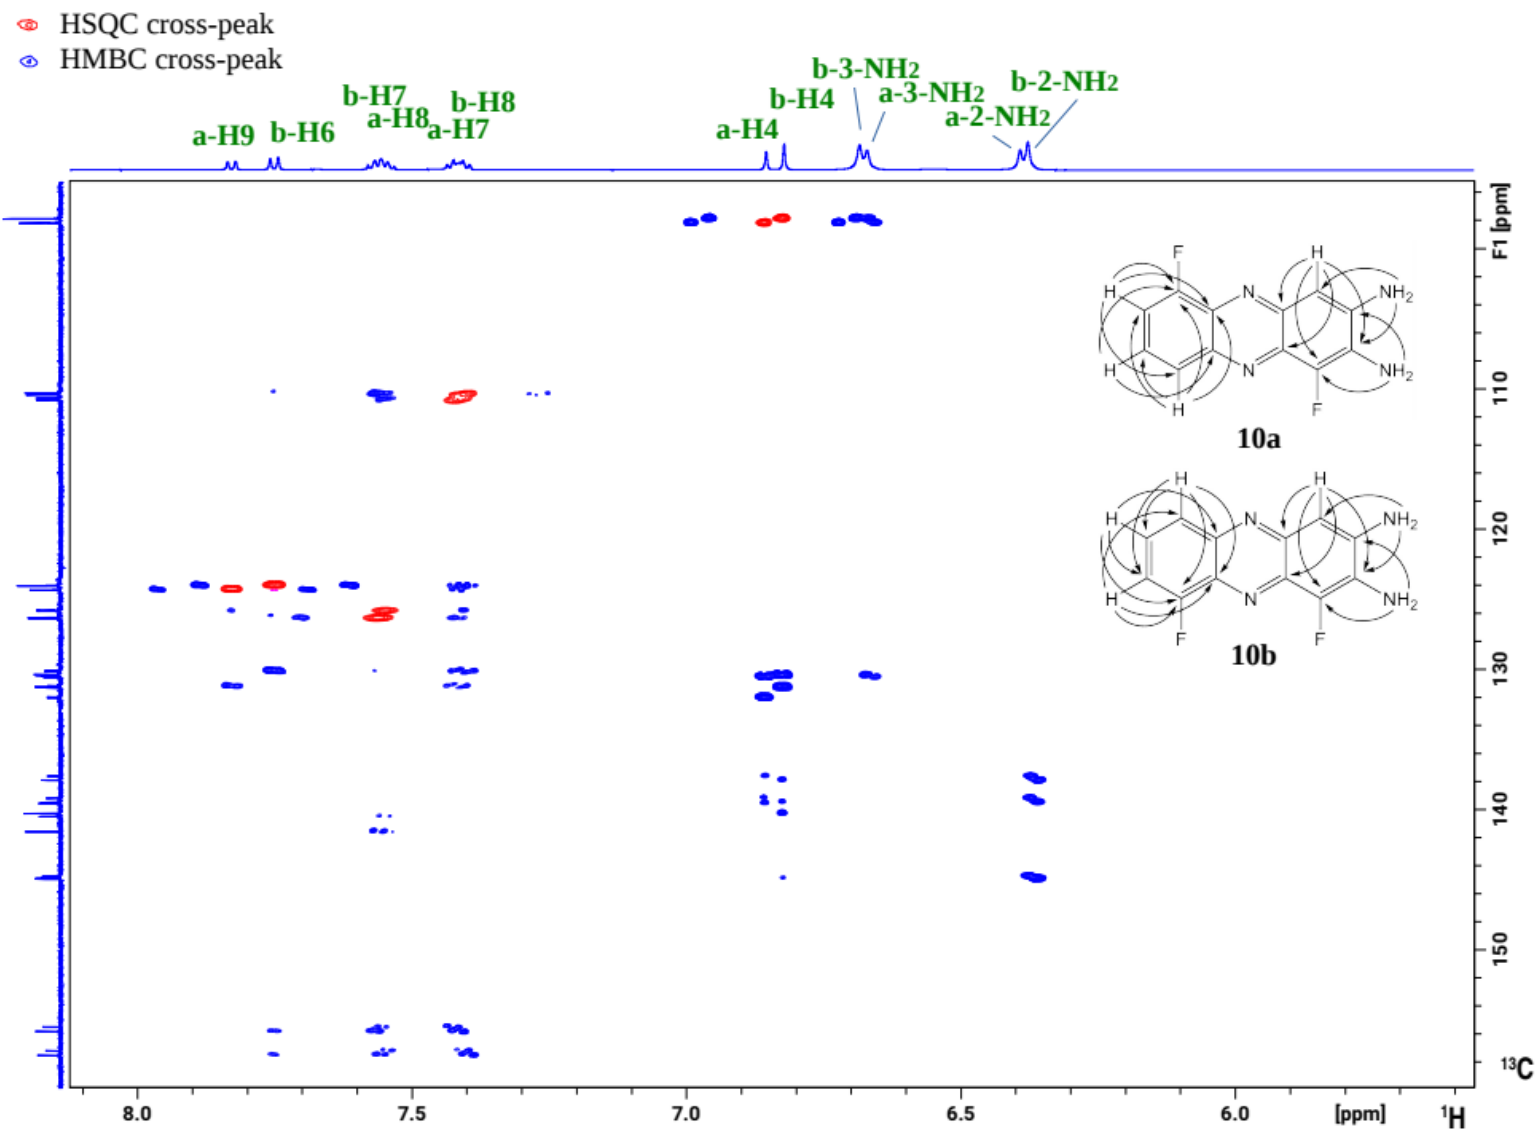

The part of the  $^1\text{H}$ - $^{15}\text{N}$  HMBC spectrum of **10a** and **10b** (DMSO- $d_6$ ), Bruker AV-400 ( $^1\text{H}$  – 400.13,  $^{15}\text{N}$  – 40.54 MHz)

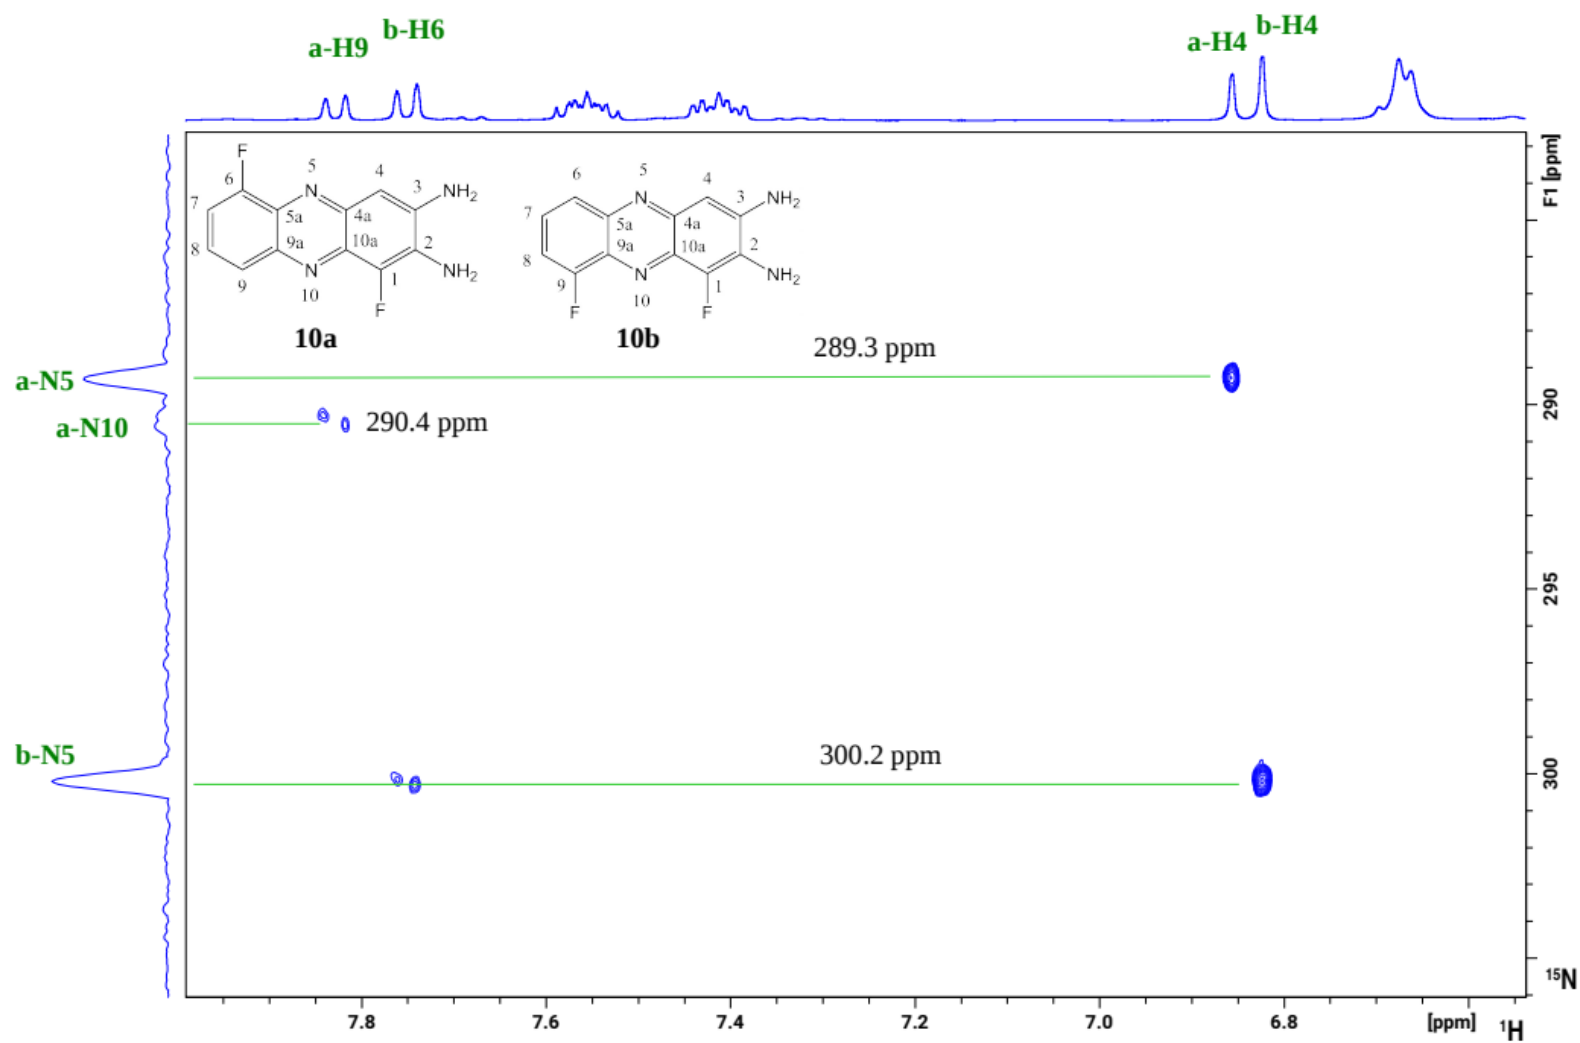

The part of the  $^1\text{H}$ - $^{15}\text{N}$  HMBC spectrum of **10a** and **10b** (DMSO- $d_6$ ), Bruker AV-600 ( $^1\text{H}$  – 600.30,  $^{15}\text{N}$  – 60.83 MHz)

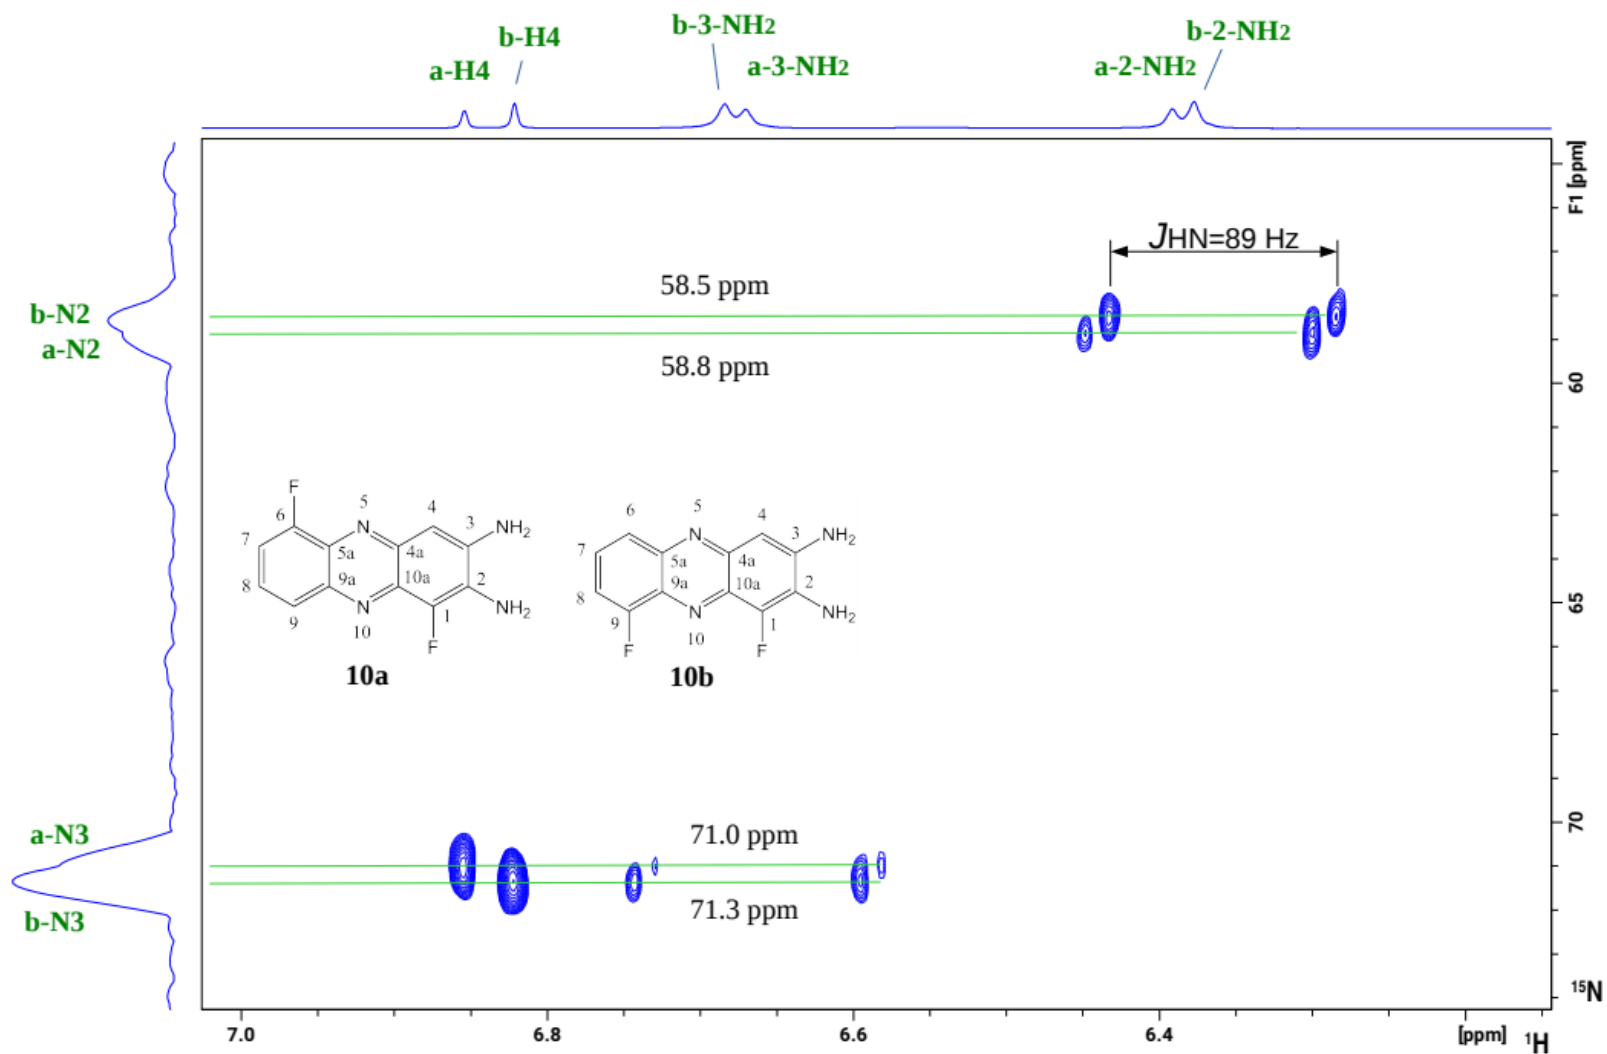

<sup>1</sup>H NMR spectrum of **11** (DMSO-d<sub>6</sub>), Bruker AV-400 (<sup>1</sup>H – 400.13 MHz)

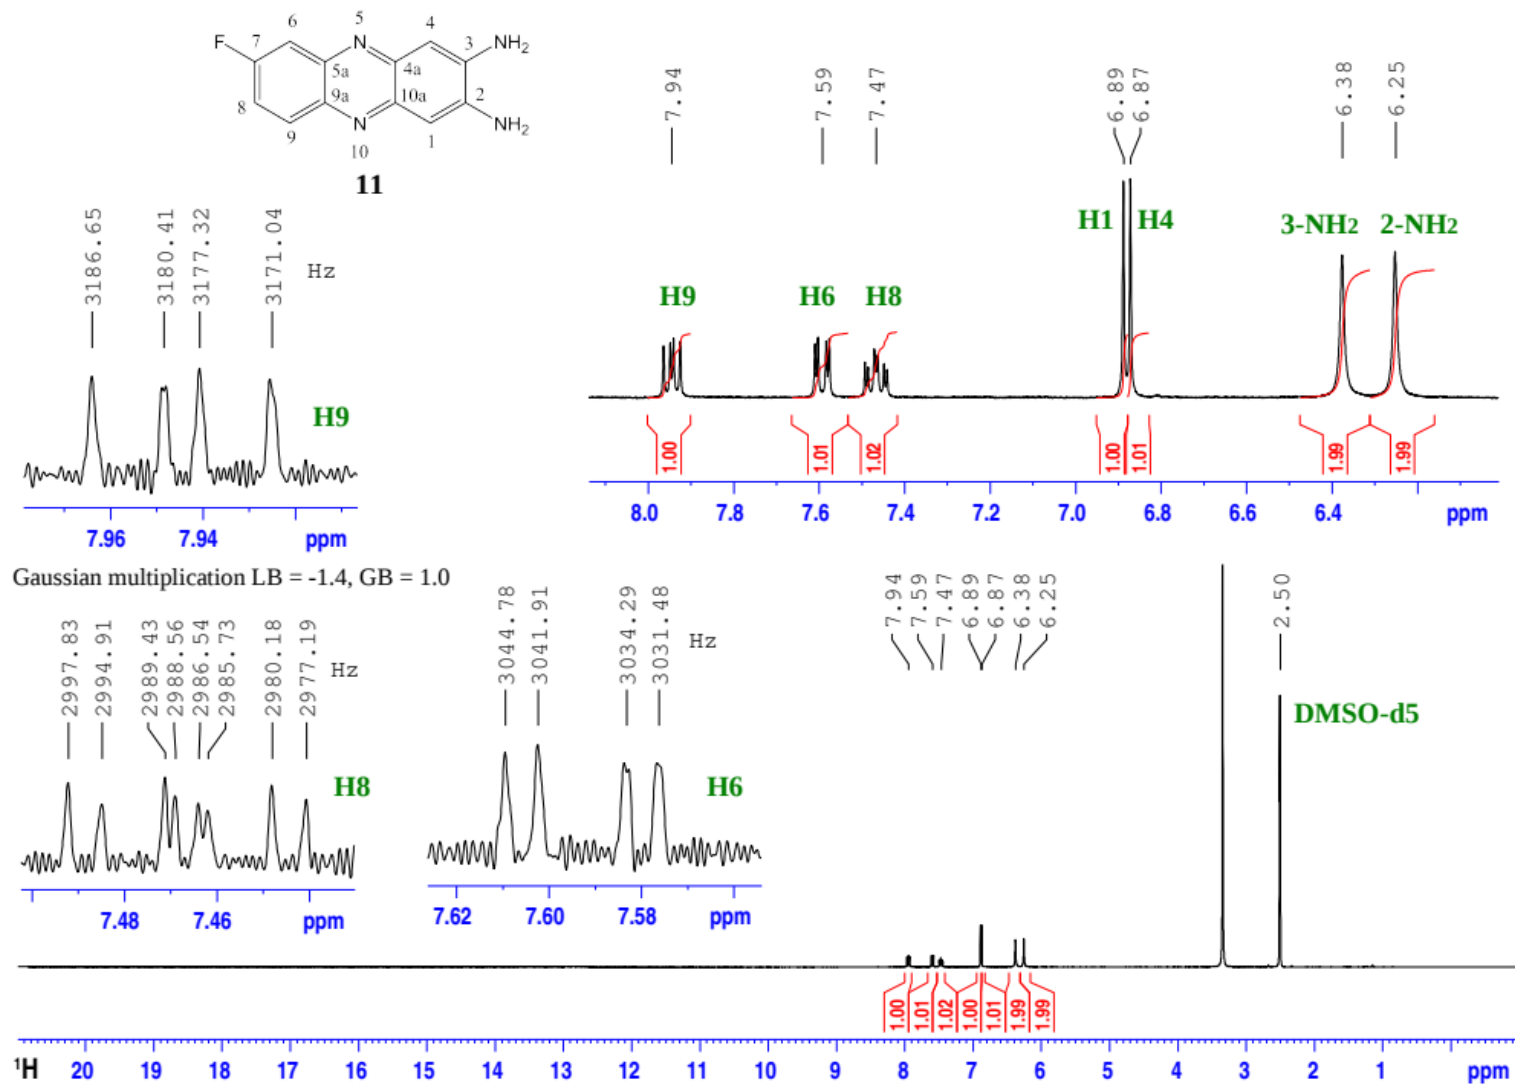



$^1\text{H}$ - $^1\text{H}$  COSY spectrum of **11** (DMSO- $d_6$ ), Bruker AV-600 ( $^1\text{H}$  – 600.30 MHz)

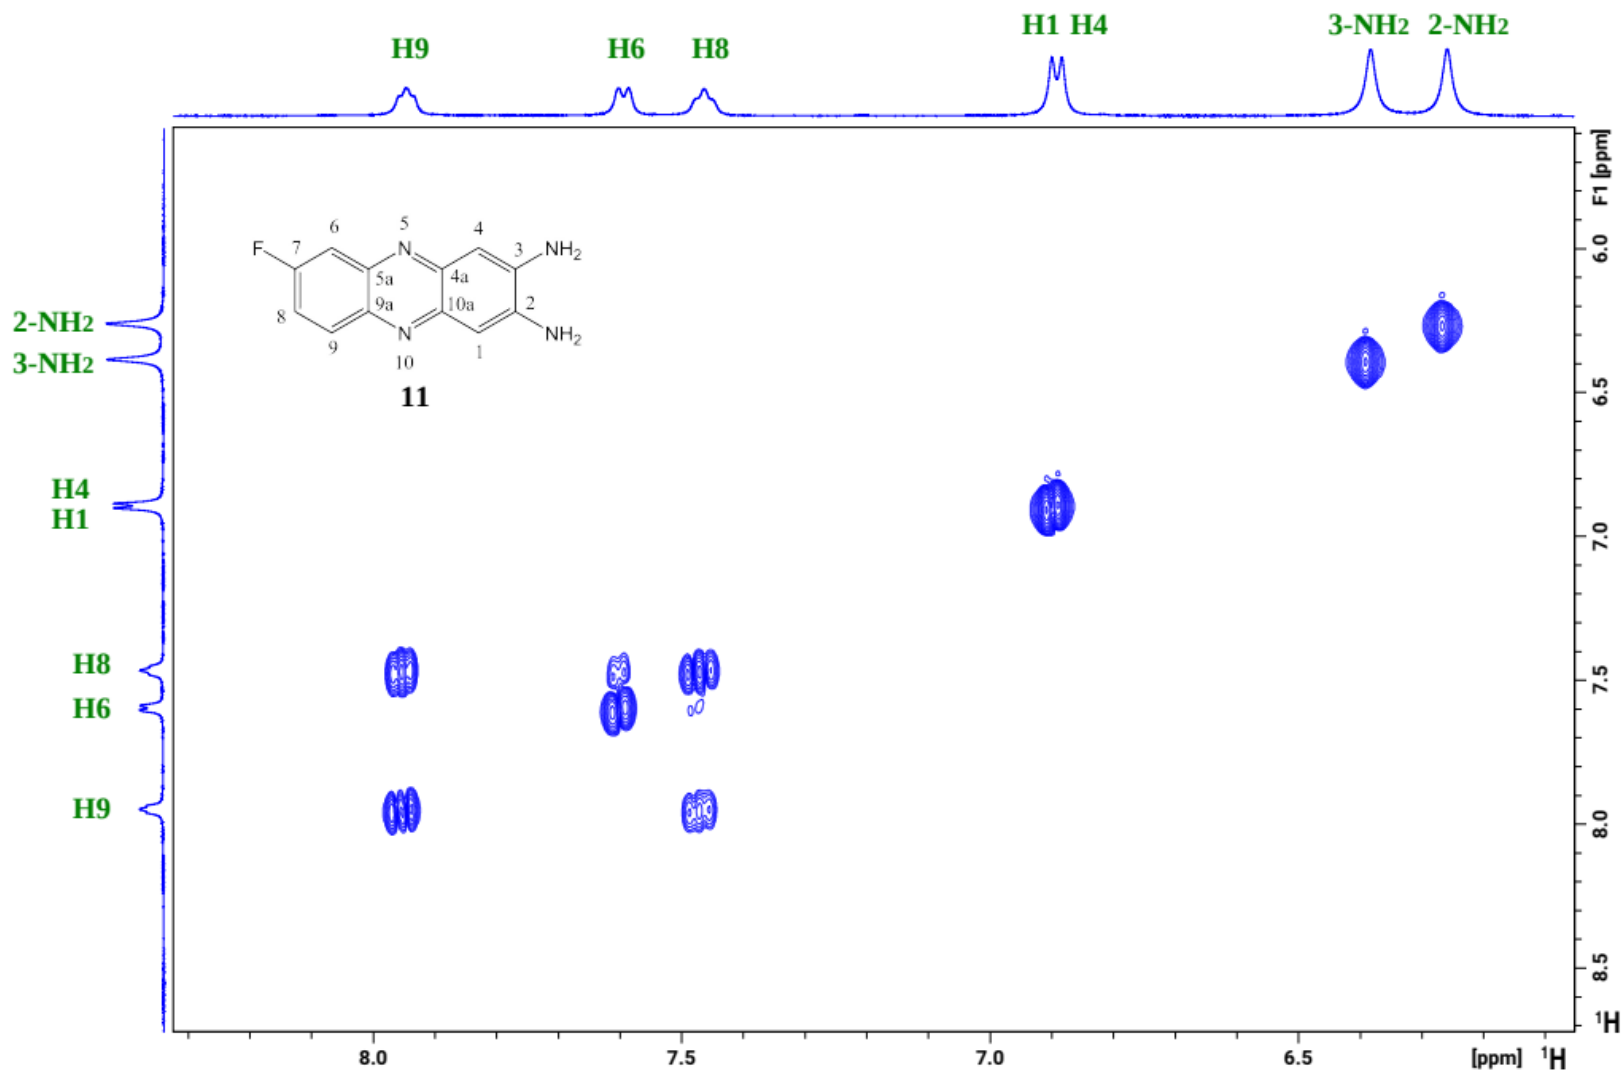

$^{19}\text{F}$  NMR spectrum of **11** (DMSO-d<sub>6</sub>), Bruker AV-400 ( $^{19}\text{F}$  – 376.50 MHz)

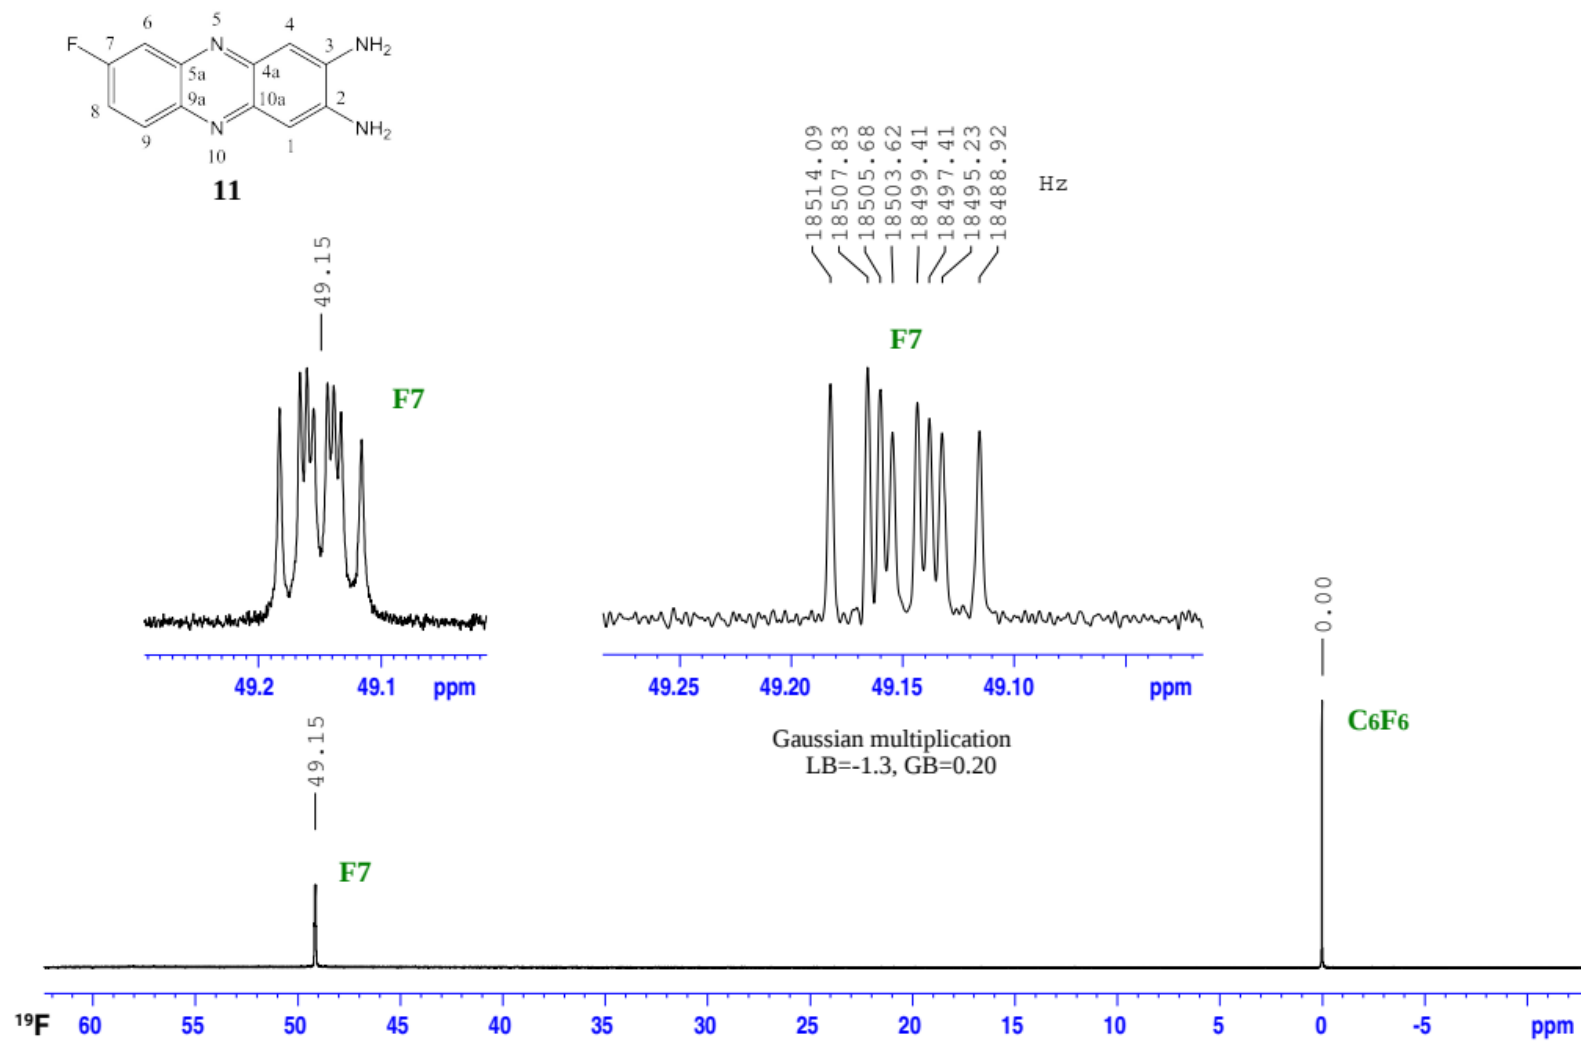

$^{13}\text{C}\{^1\text{H}\}$  NMR spectrum of **11** (DMSO- $d_6$ ), Bruker AV-600 ( $^1\text{H}$  – 600.30,  $^{13}\text{C}$  – 150.95 MHz)

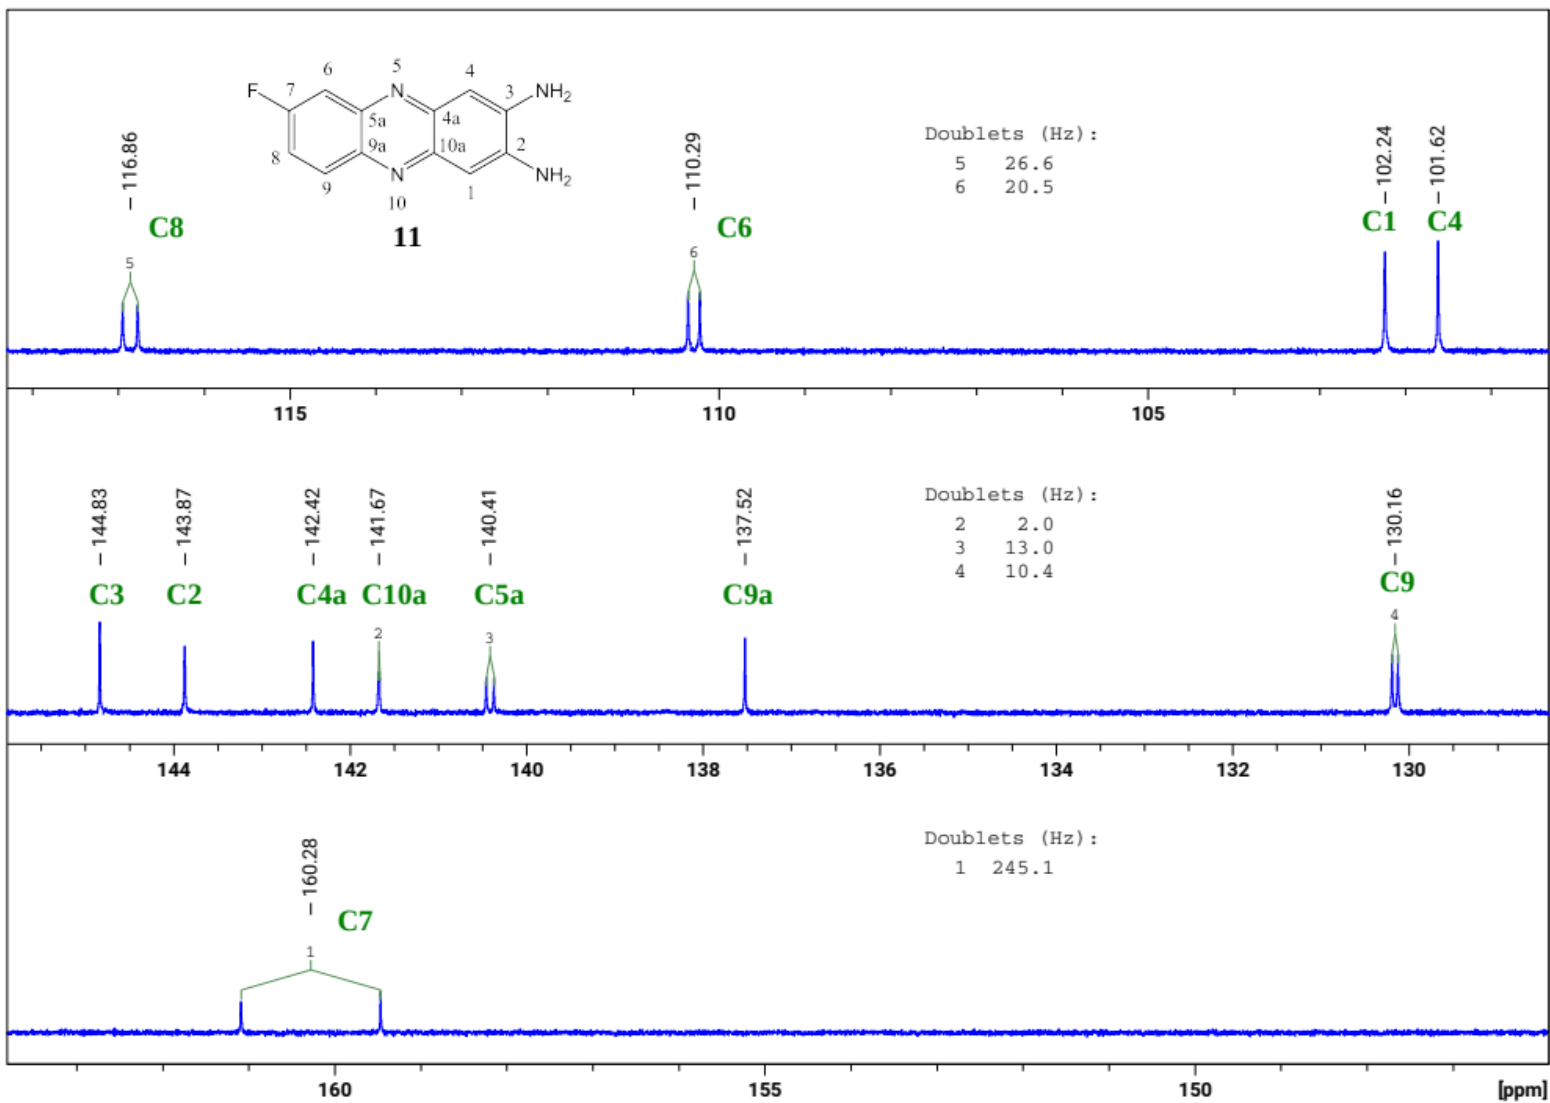

$^1\text{H}$ - $^{13}\text{C}$  correlation NMR spectra of **11** (DMSO- $d_6$ ), Bruker AV-600 ( $^1\text{H}$  – 600.30,  $^{13}\text{C}$  – 150.95 MHz)

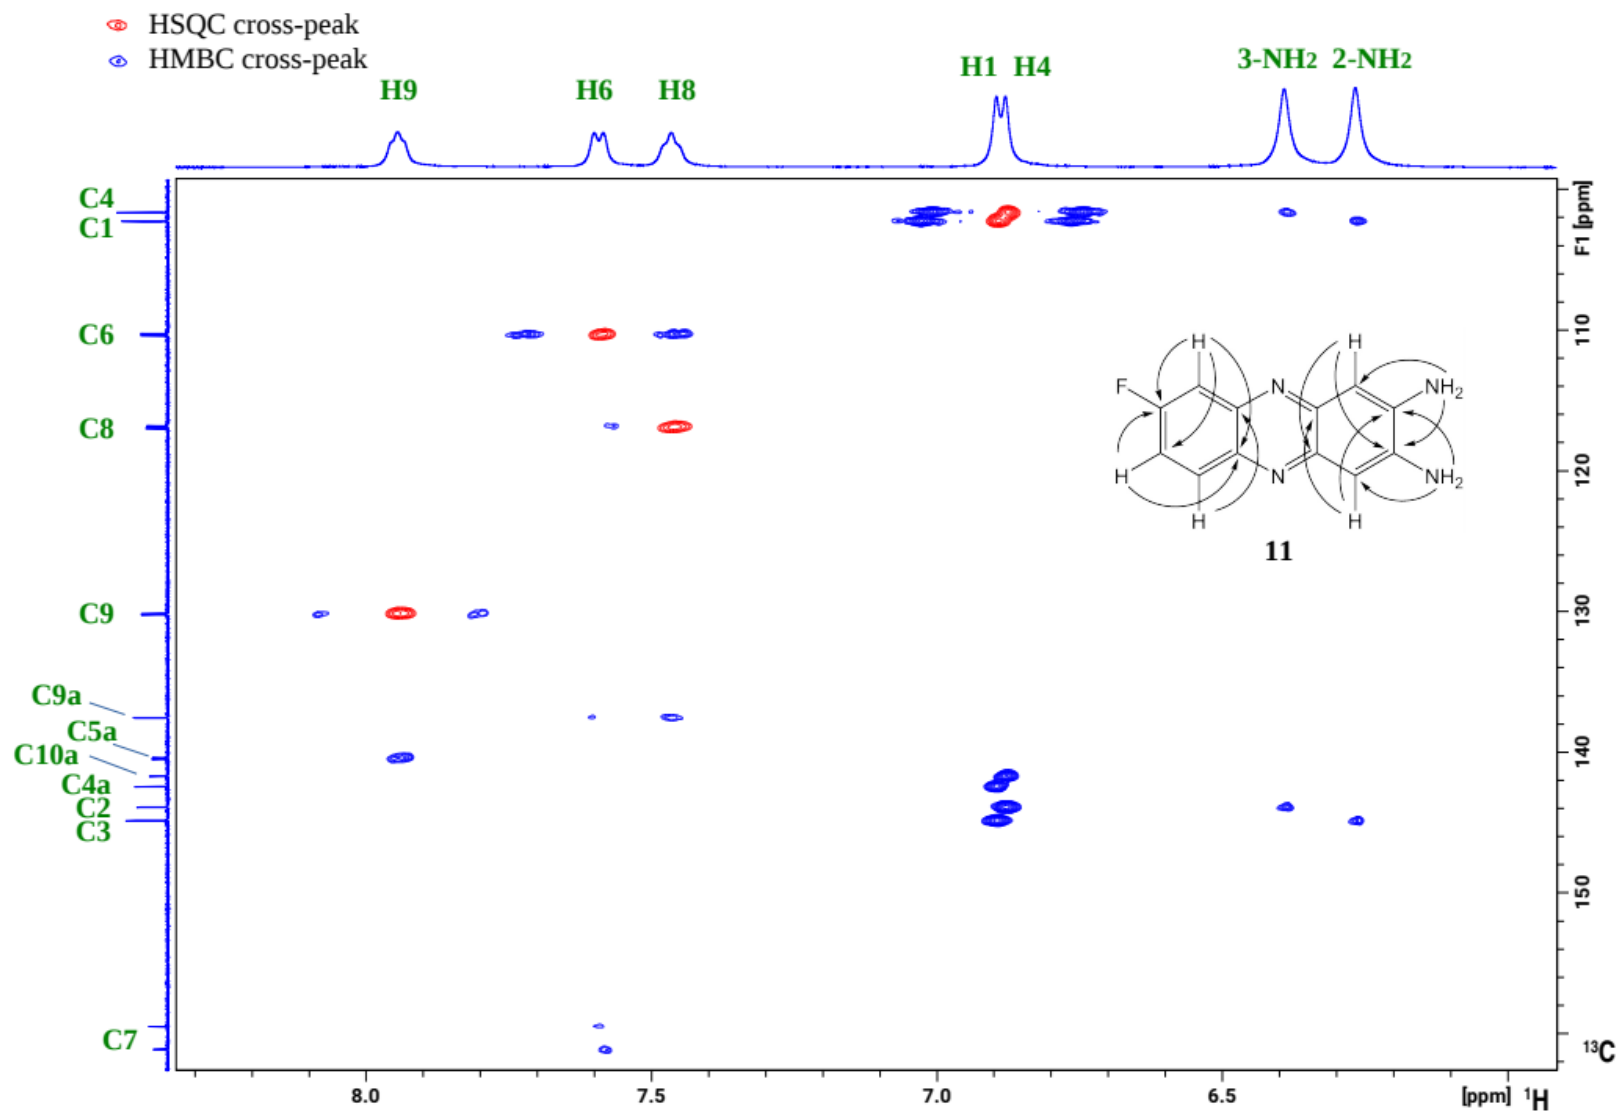

$^1\text{H}$  NMR spectrum of **12a** and **12b** (DMSO- $d_6$ ), Bruker AV-600 ( $^1\text{H}$  – 600.30 MHz)

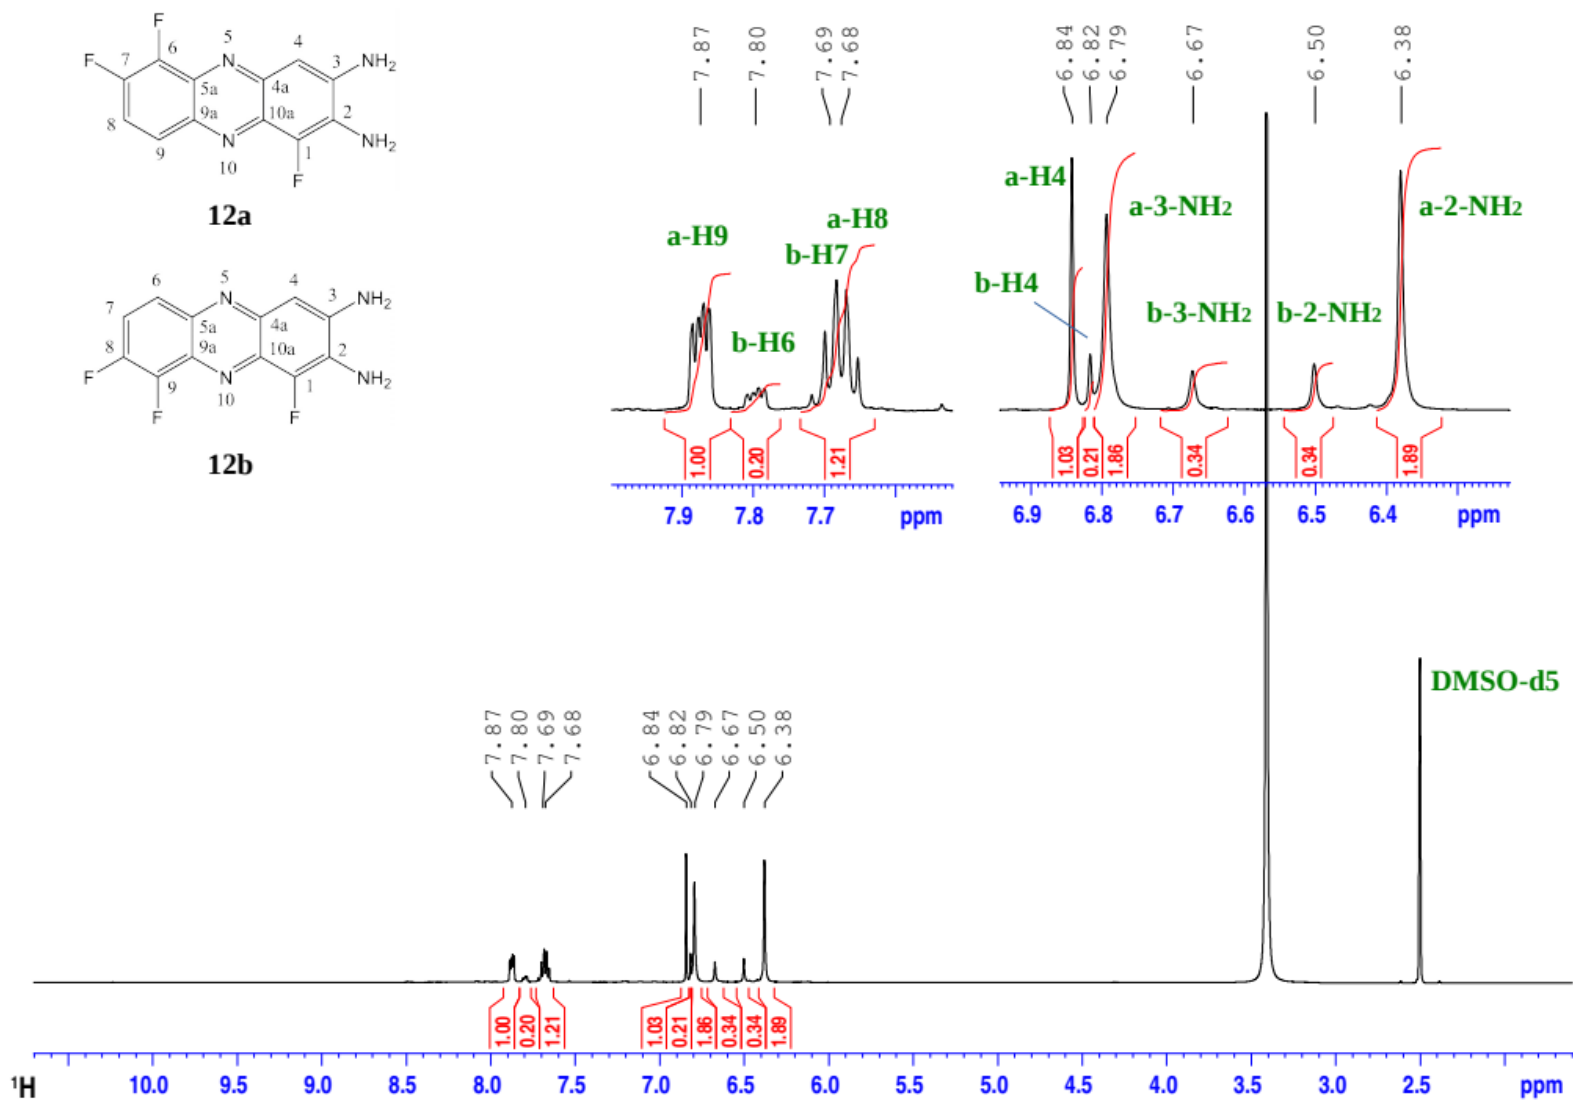

Multiplets in  $^1\text{H}$  NMR spectrum of **12a** and **12b** (DMSO- $d_6$ ), Bruker AV-600 ( $^1\text{H}$  – 600.30 MHz)

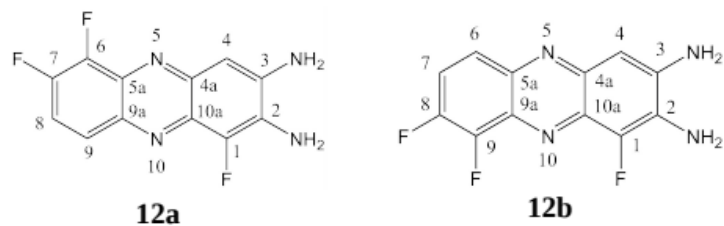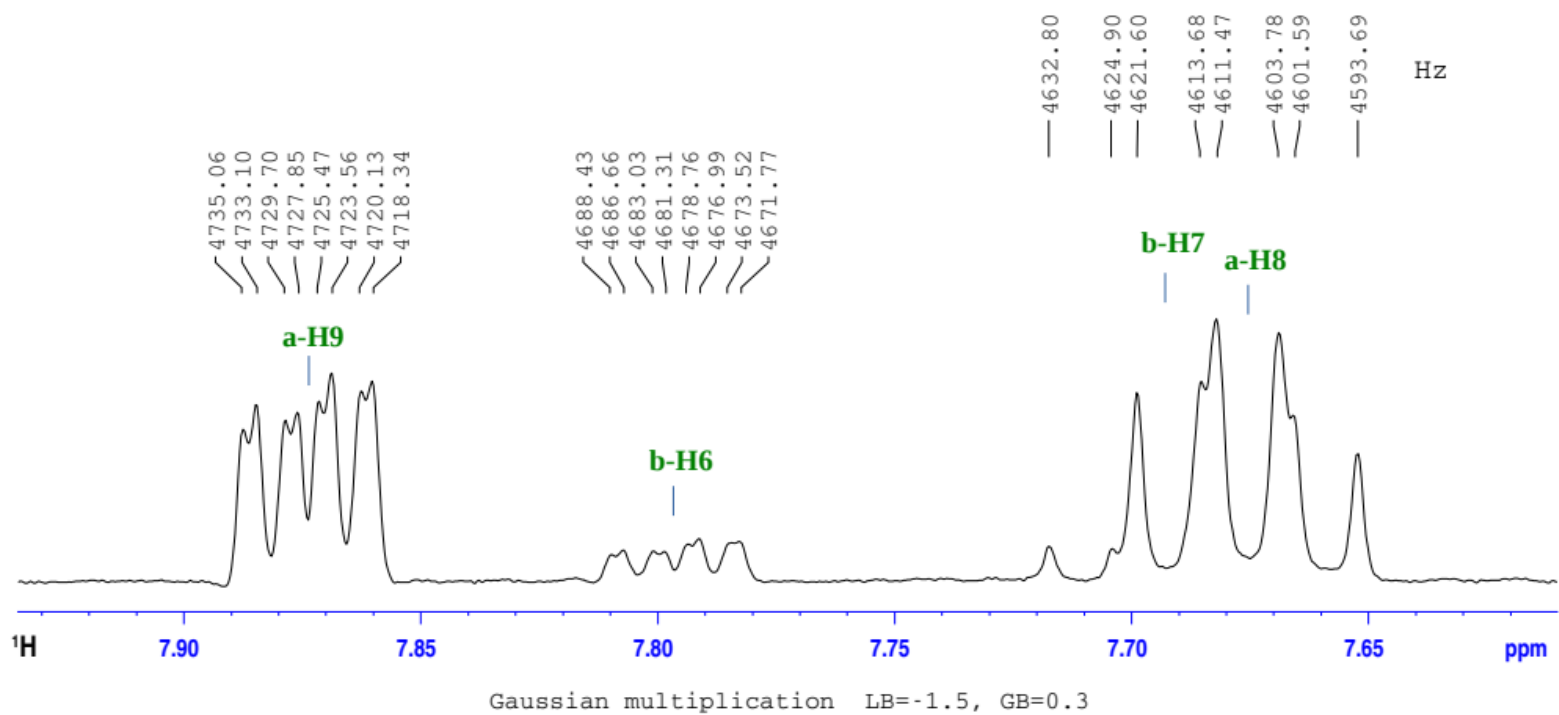

$^{19}\text{F}$  NMR spectrum of **12a** and **12b** (DMSO-d<sub>6</sub>), Bruker AV-300 ( $^{19}\text{F}$  – 282.40 MHz)

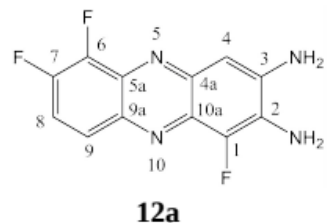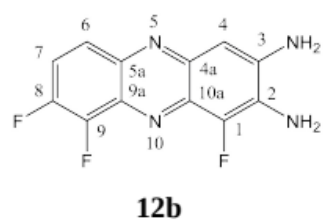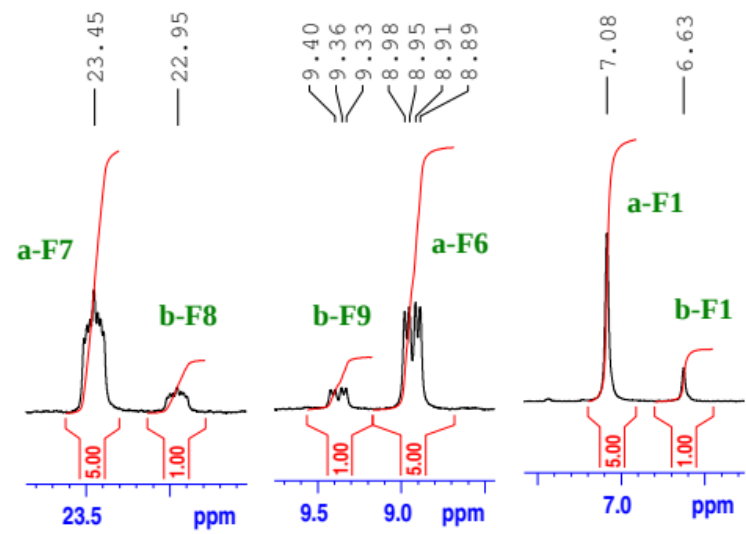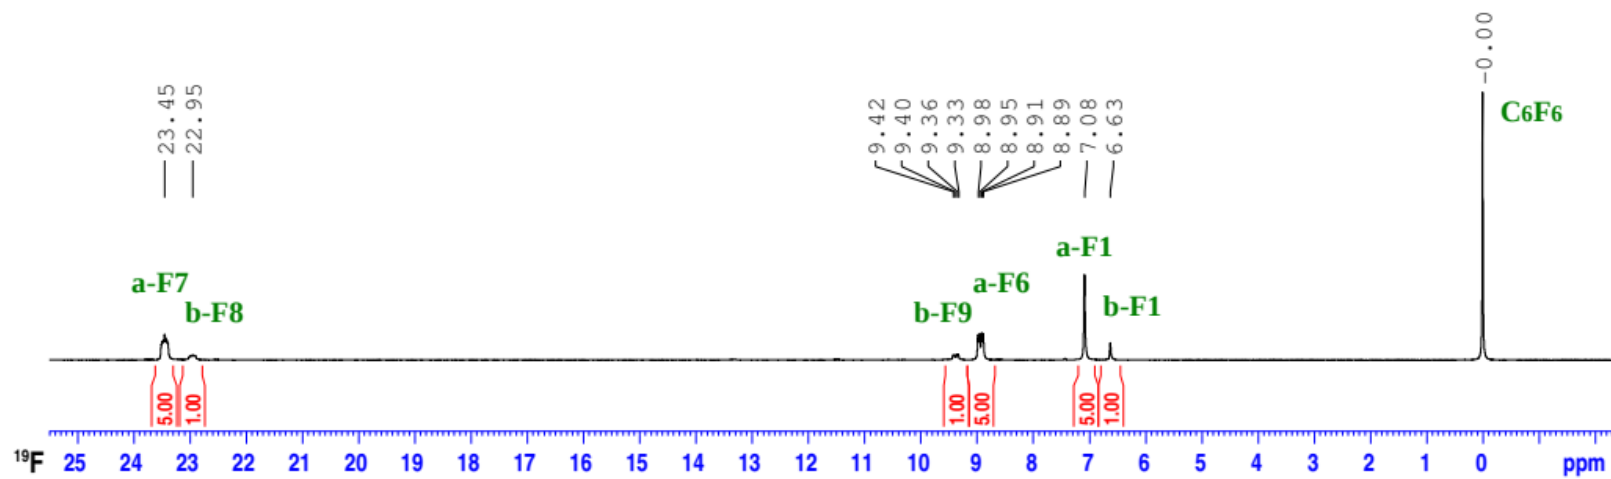

Multiplets in  $^{19}\text{F}$  NMR spectrum of **12a** and **12b** (DMSO- $d_6$ ), Bruker AV-300 ( $^{19}\text{F}$  – 282.40 MHz)

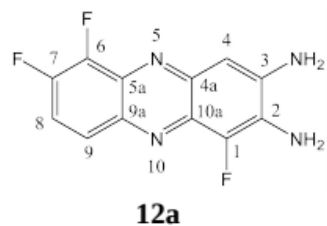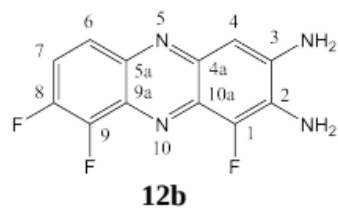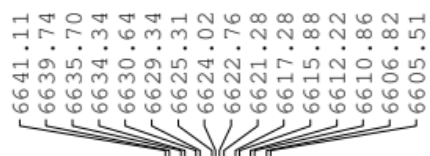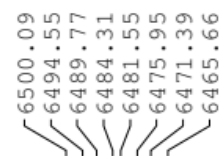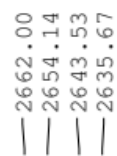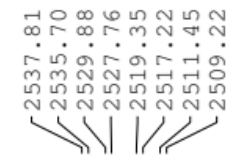

Hz

Gaussian multiplication  
LB=-2.1, GB=0.4

**a-F7**

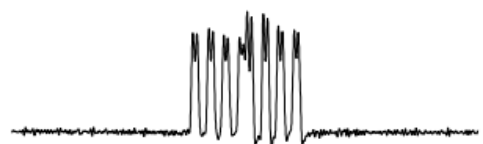

$^{19}\text{F}$  23.7 23.6 23.5 23.4 23.3 ppm

**b-F8**

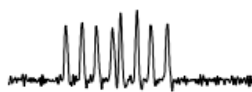

23.0 ppm

**b-F9**

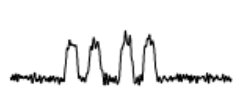

9.4 ppm

**a-F6**

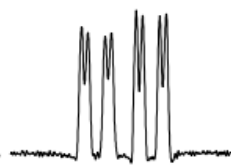

9.0 ppm



$^{19}\text{F}\{^1\text{H}\}$  NMR spectrum of **12a** and **12b** (DMSO- $d_6$ ), Bruker AV-400 ( $^{19}\text{F}$  – 376.50 MHz,  $^1\text{H}$  – 400.13 MHz)

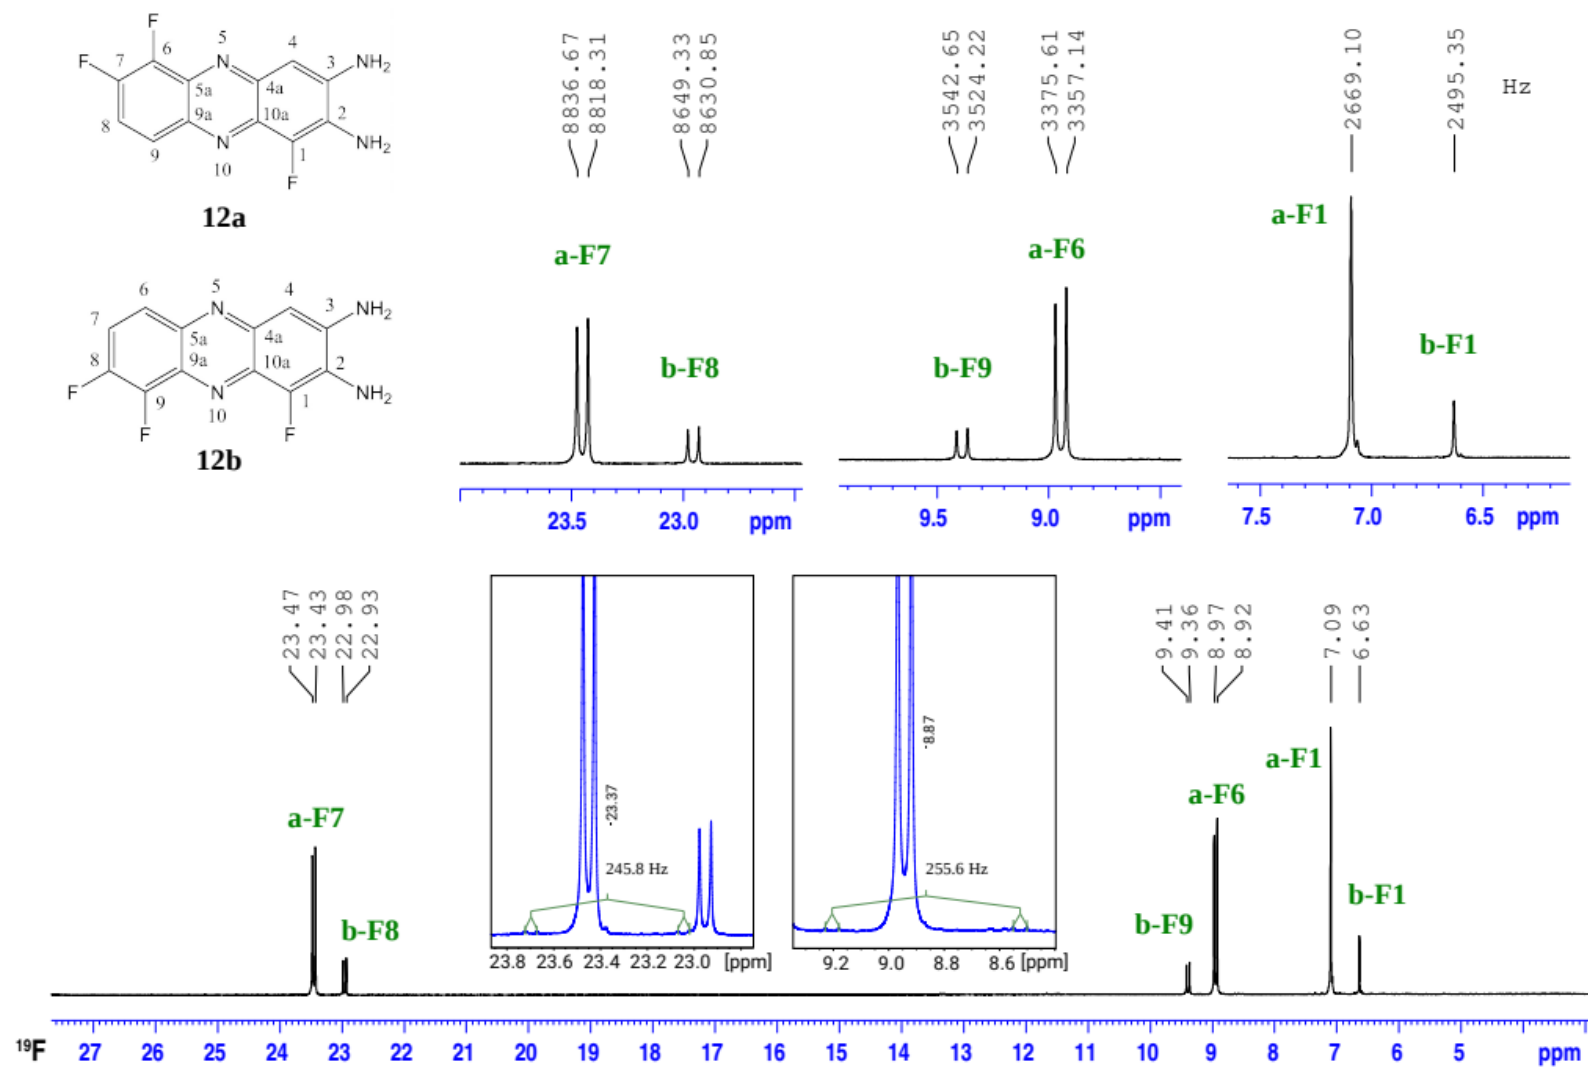

$^{19}\text{F}$ - $^{19}\text{F}$  COSY spectrum of **12a** and **12b** (DMSO- $d_6$ ), Bruker AV-400 ( $^{19}\text{F}$  – 376.50)

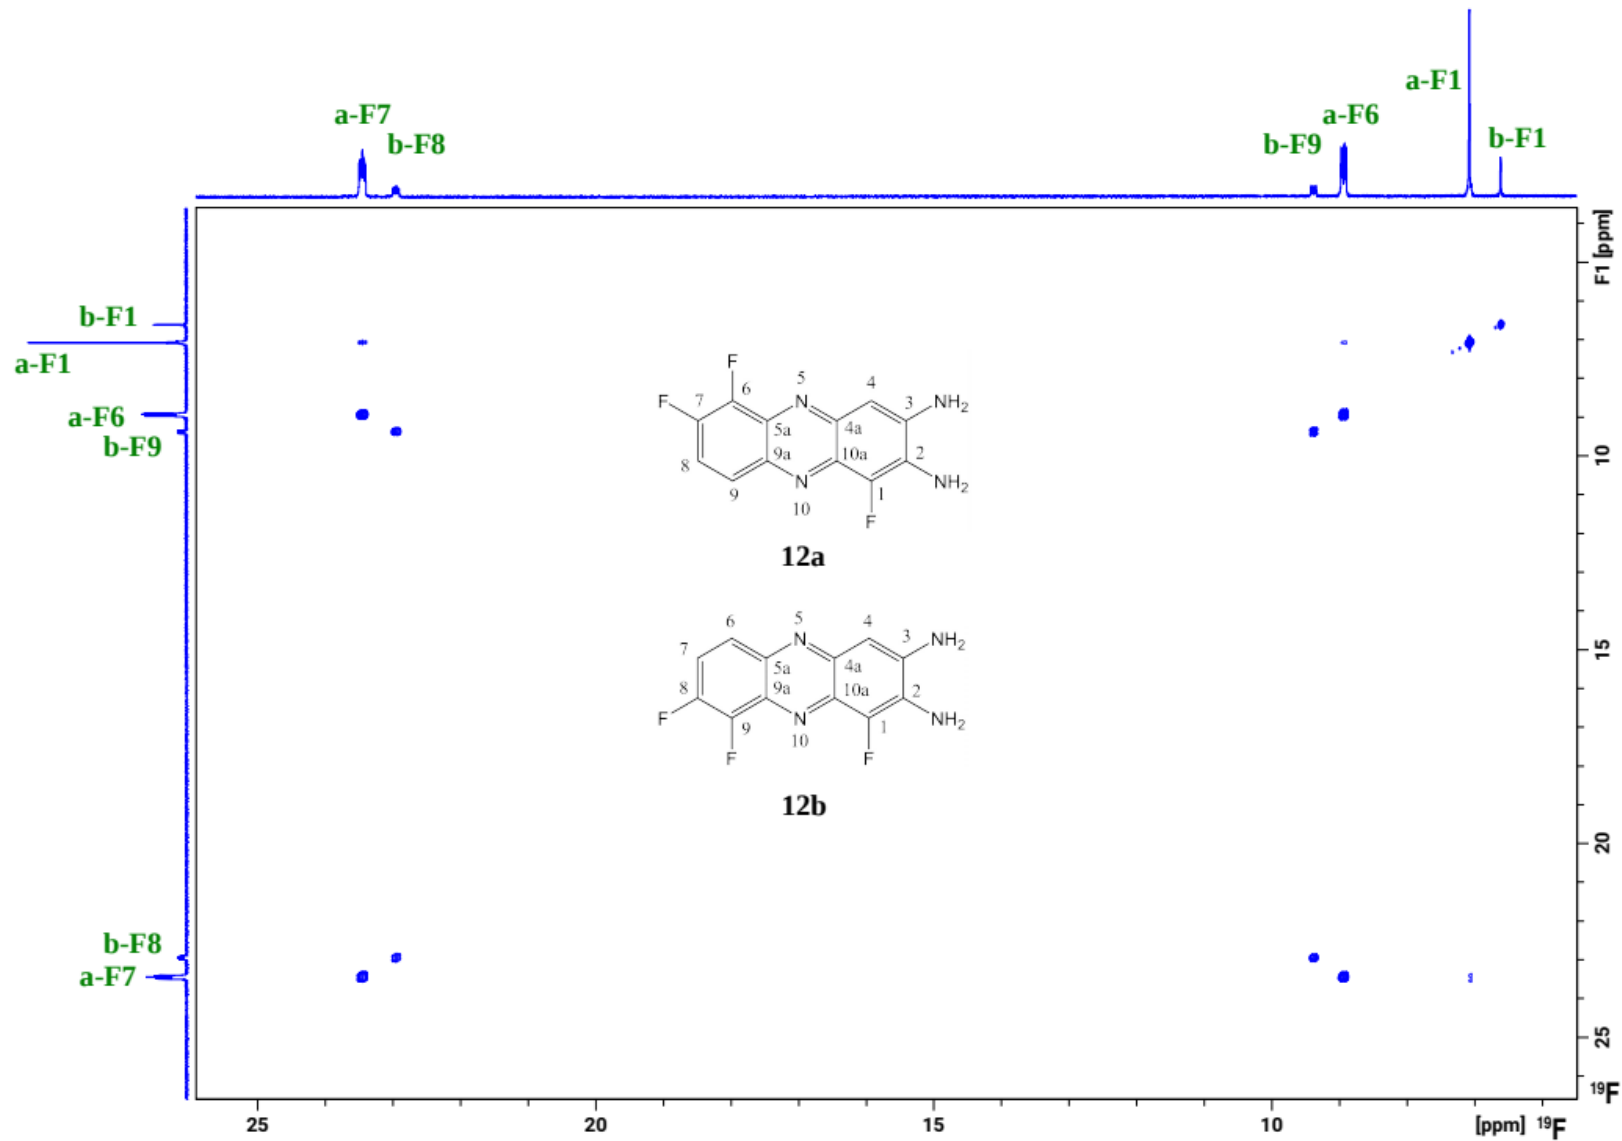

$^{13}\text{C}\{^1\text{H}\}$  NMR spectrum of **12a** and **12b** (DMSO- $d_6$ ), Bruker AV-400 ( $^{13}\text{C}$  – 100.61 MHz,  $^1\text{H}$  – 400.13 MHz)

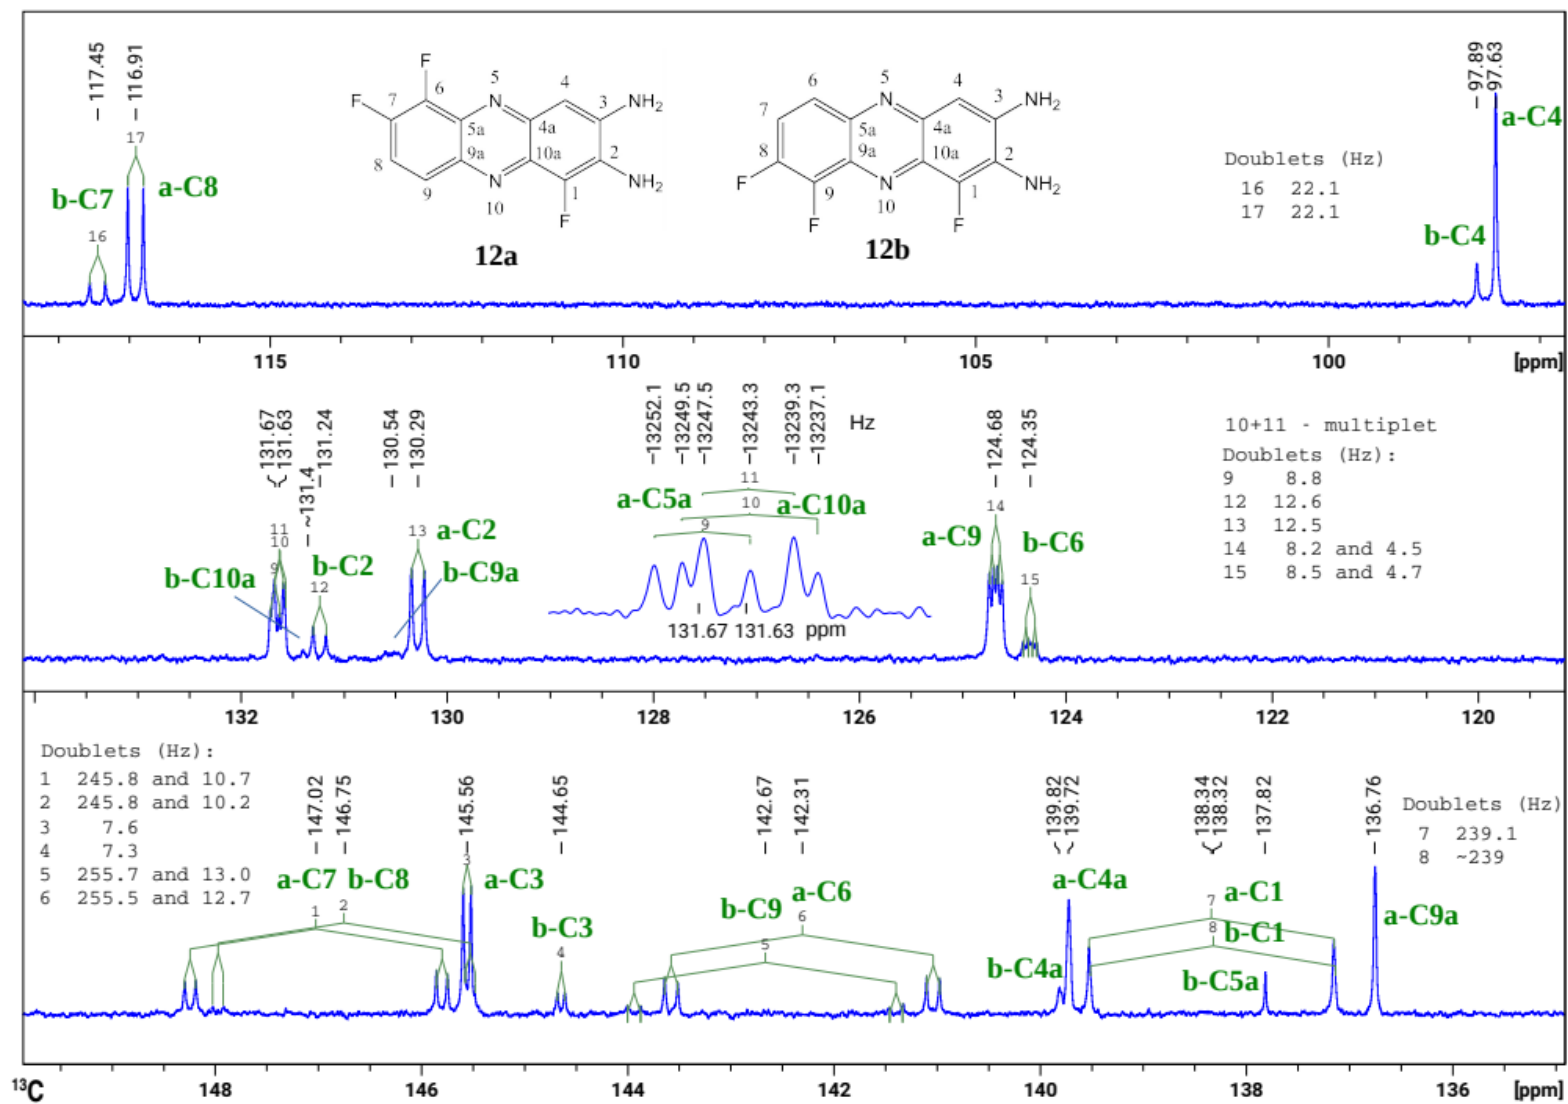

The part of the  $^1\text{H}$ - $^{13}\text{C}$  correlation NMR spectra of **12a** and **12b** (DMSO- $d_6$ ), Bruker AV-600 ( $^1\text{H}$  – 600.30,  $^{13}\text{C}$  – 150.95 MHz)

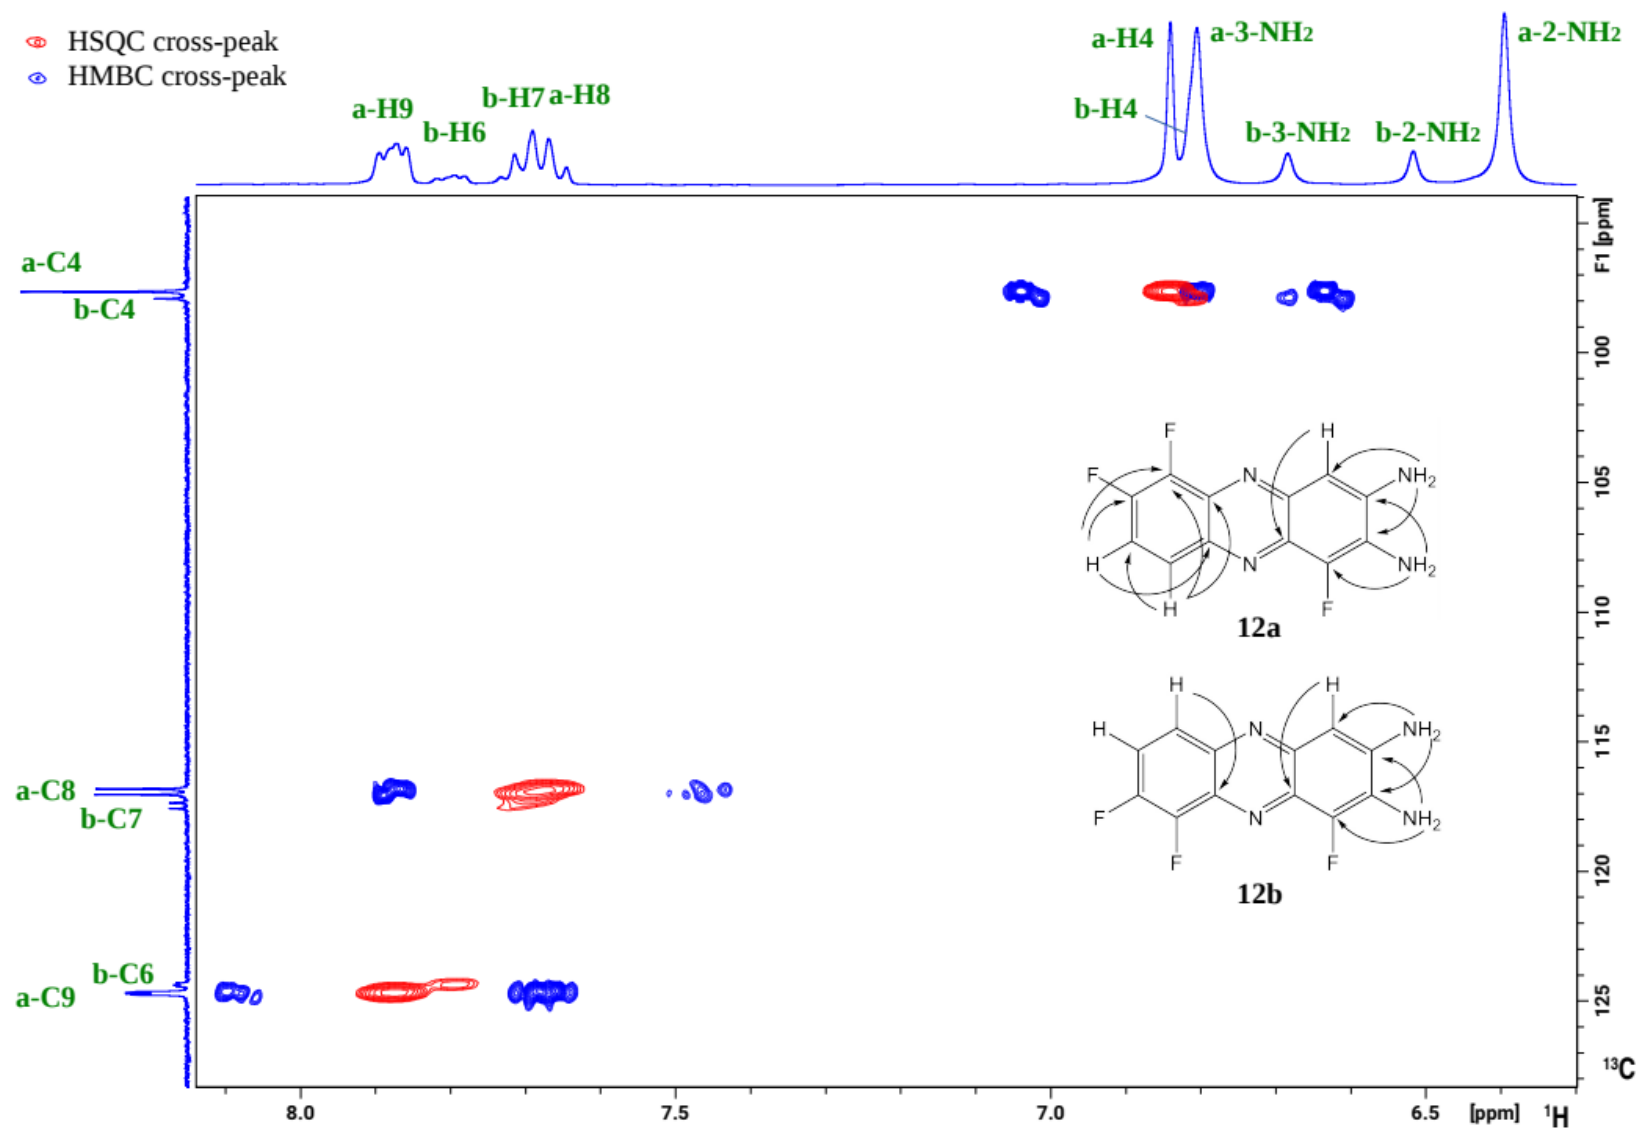

The part of the  $^1\text{H}$ - $^{13}\text{C}$  correlation NMR spectra of **12a** and **12b** (DMSO- $d_6$ ), Bruker AV-600 ( $^1\text{H}$  – 600.30,  $^{13}\text{C}$  – 150.95 MHz)

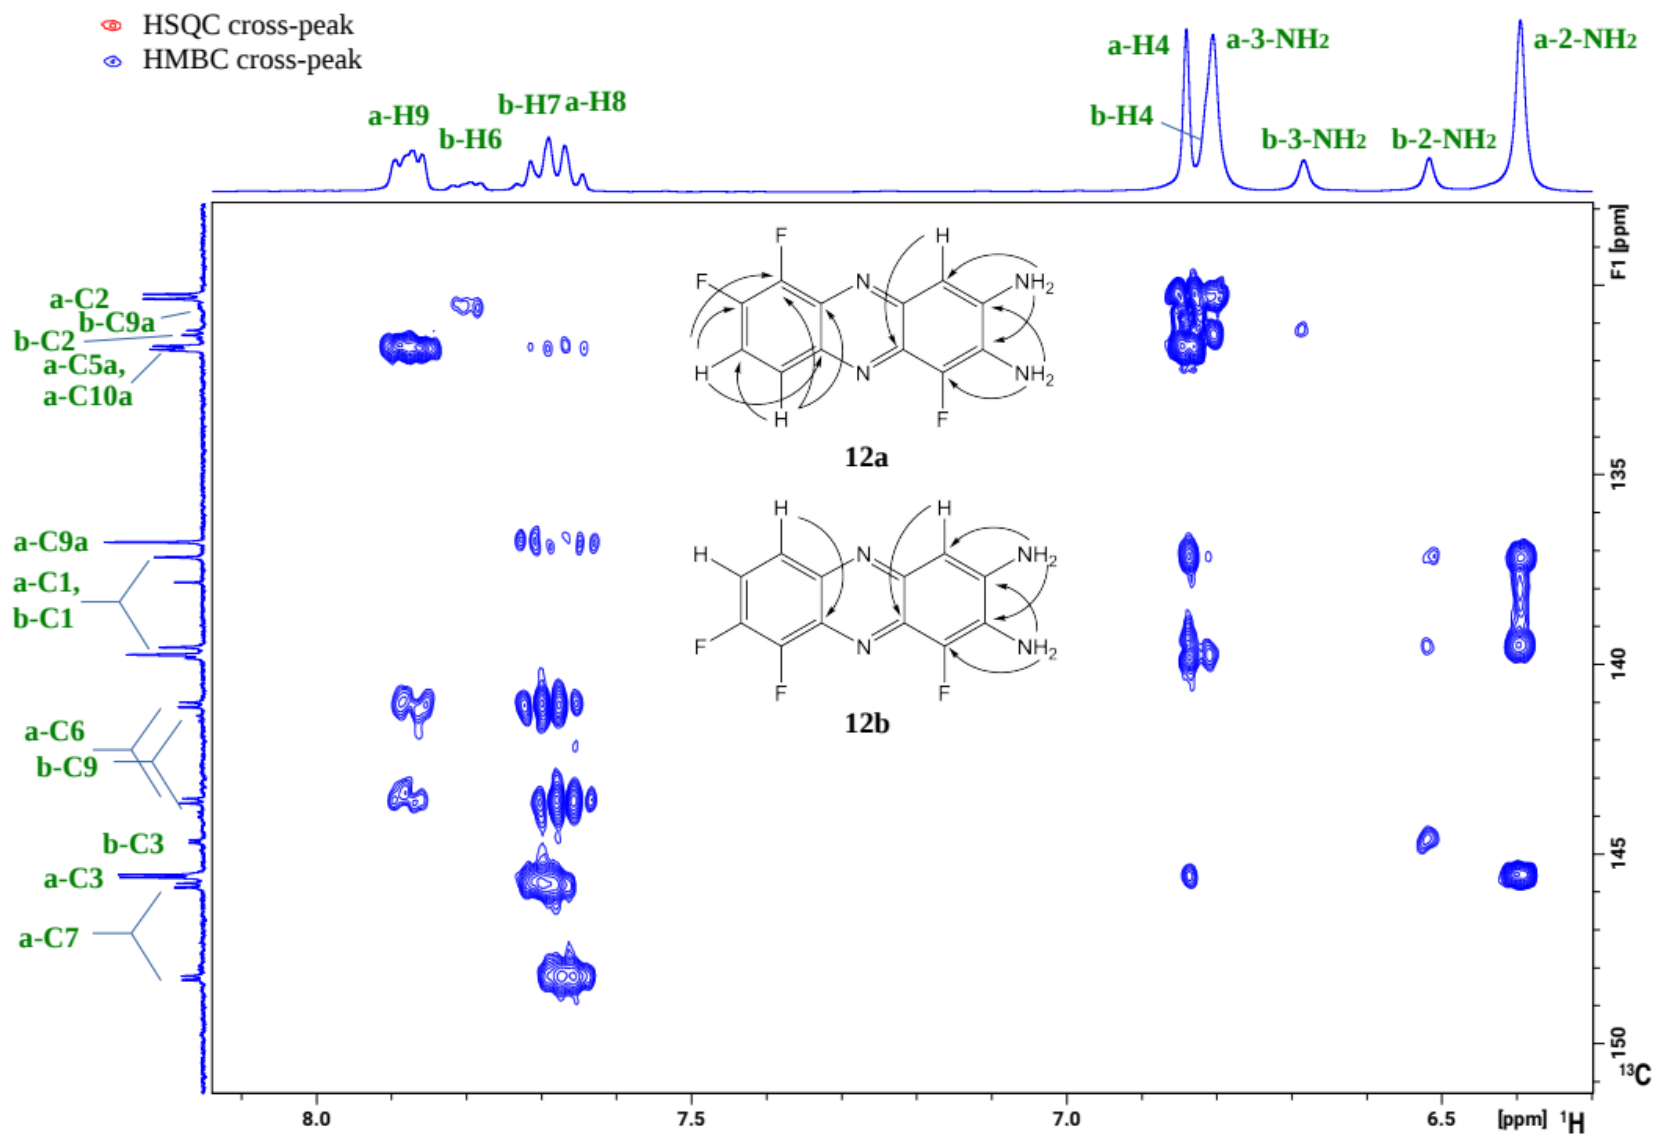

The part of the  $^1\text{H}$ - $^{15}\text{N}$  HMBC spectrum of **12a** and **12b** (DMSO- $d_6$ ), Bruker AV-600 ( $^1\text{H}$  – 600.30,  $^{15}\text{N}$  – 60.83 MHz)

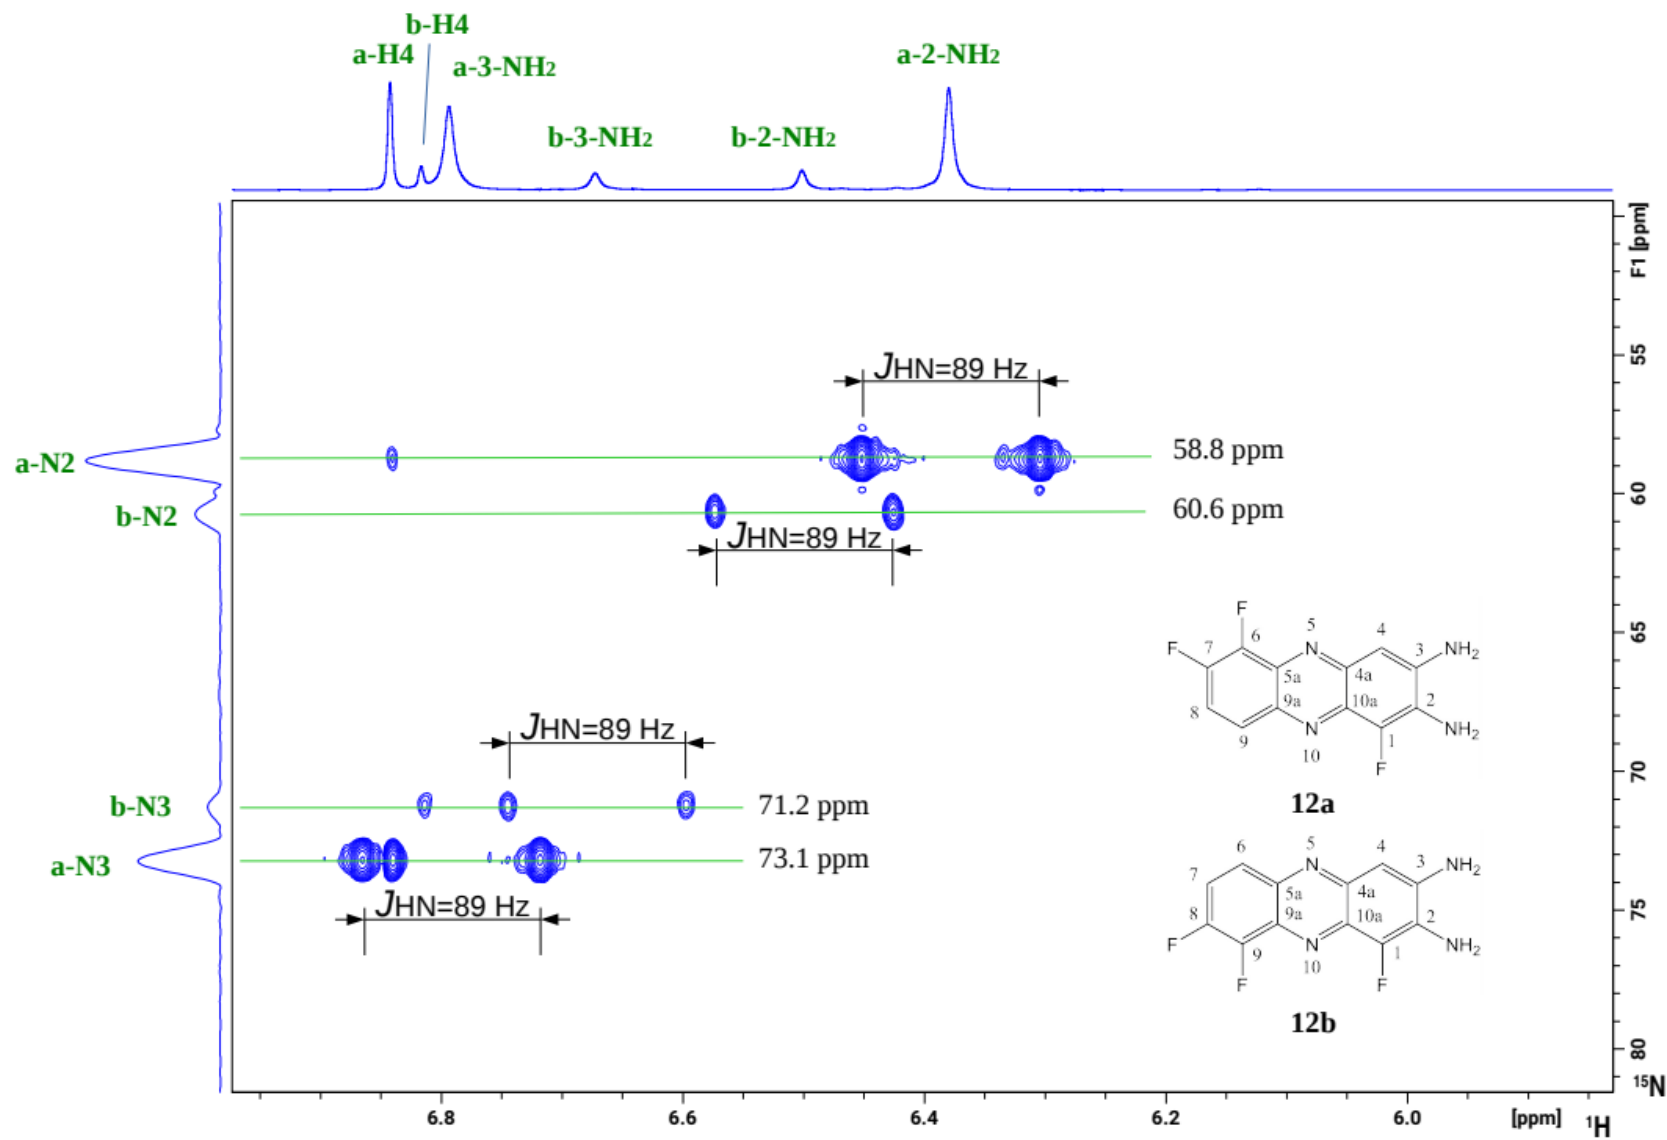

The part of the  $^1\text{H}$ - $^{15}\text{N}$  HMBC spectrum of **12a** and **12b** (DMSO- $d_6$ ), Bruker AV-600 ( $^1\text{H}$  – 600.30,  $^{15}\text{N}$  – 60.83 MHz)

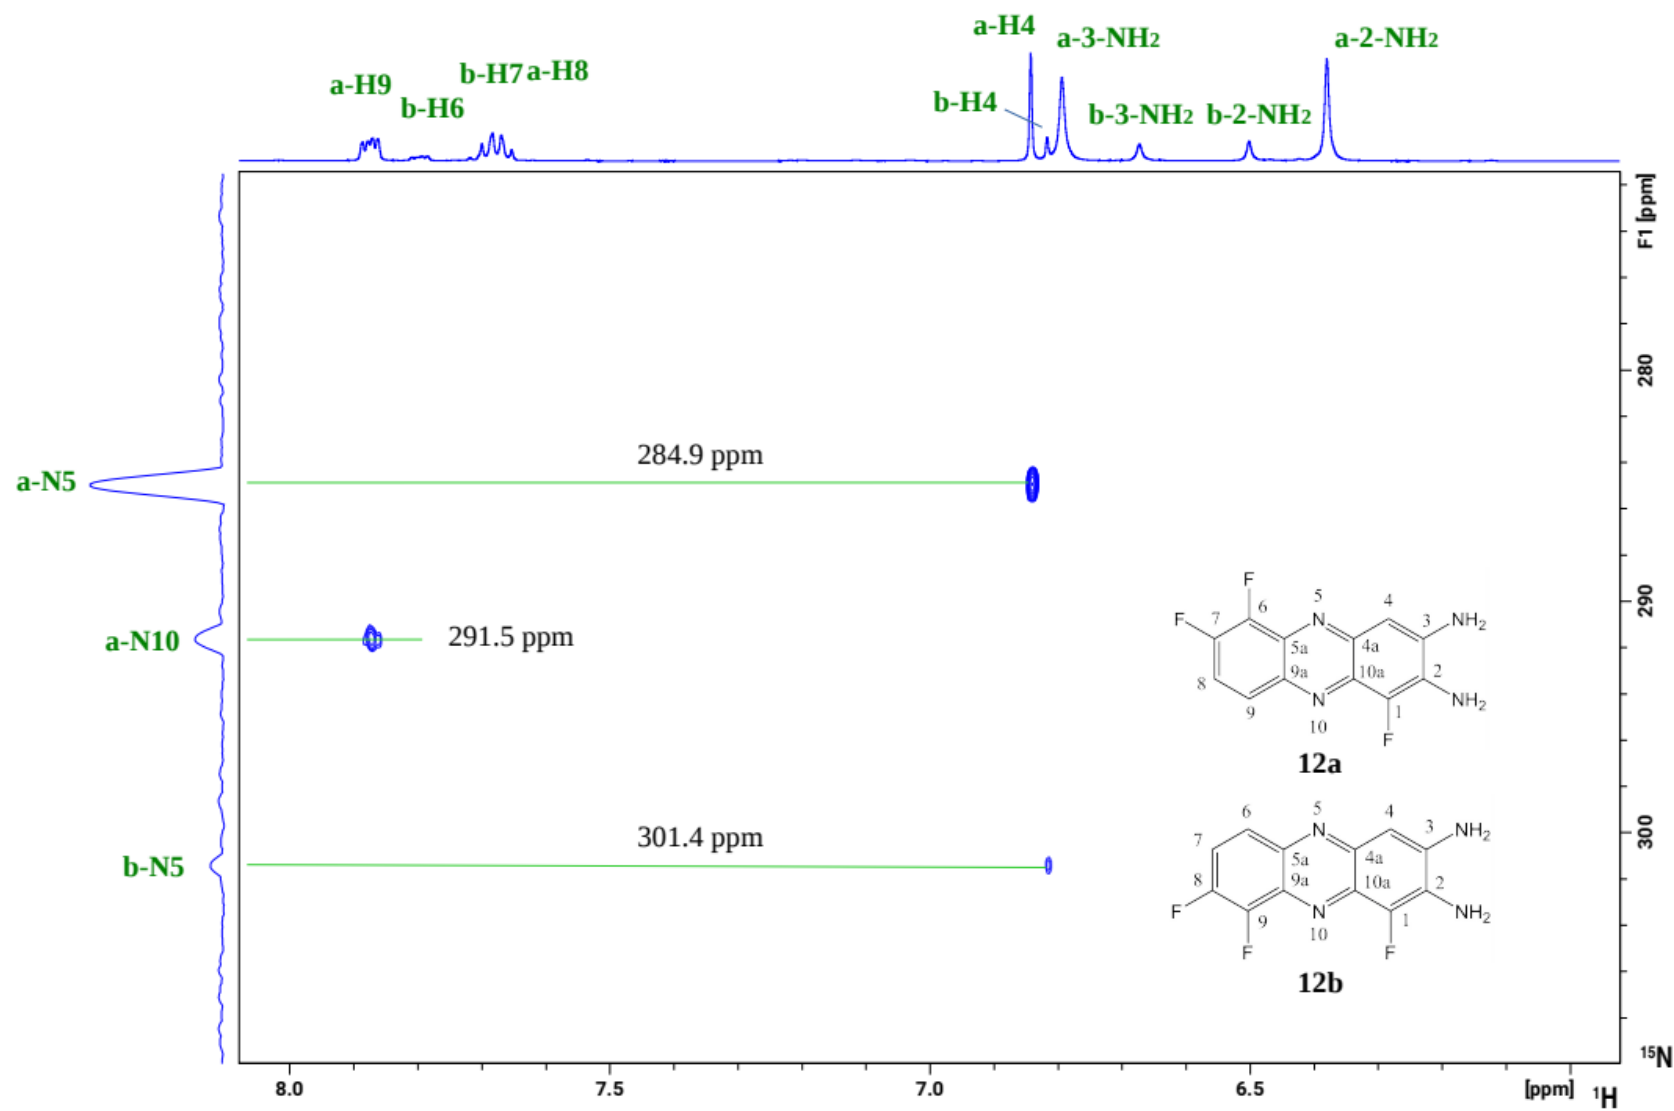

<sup>1</sup>H NMR spectrum of **13a** and **13b** (DMSO-d<sub>6</sub>), Bruker AV-600 (<sup>1</sup>H – 600.30 MHz)

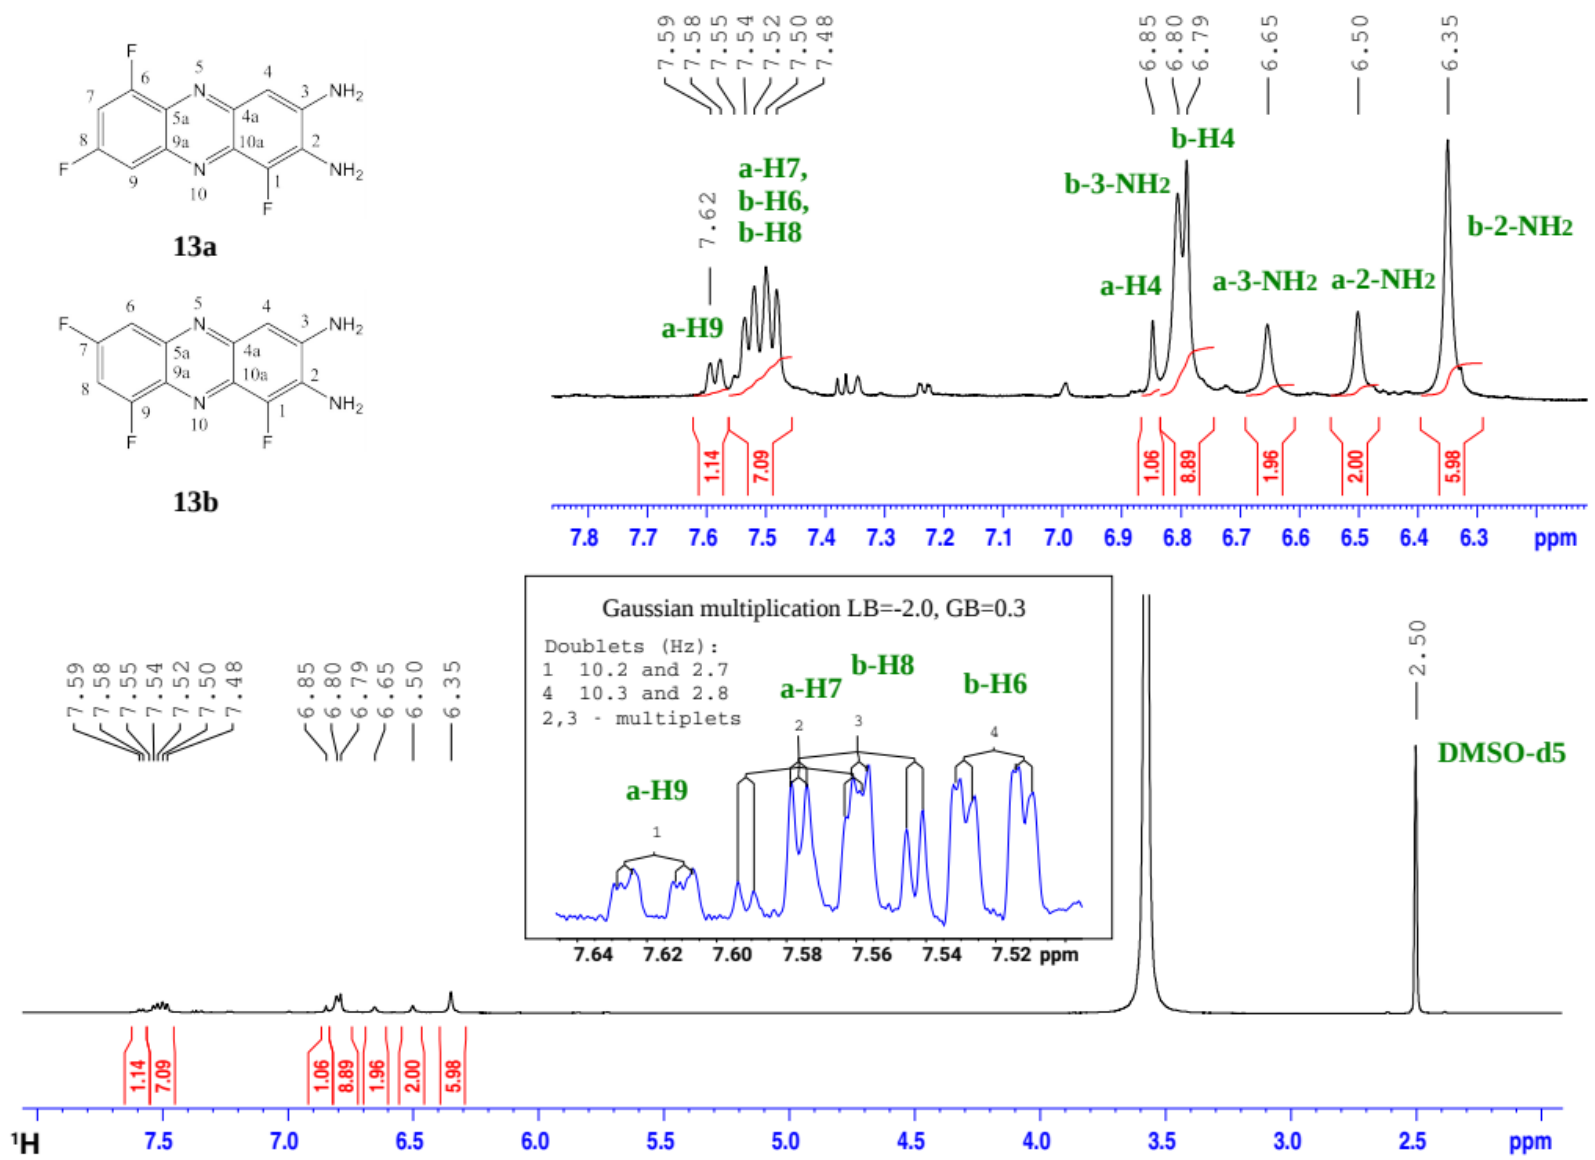



<sup>19</sup>F NMR spectrum of **13a** and **13b** (DMSO-d<sub>6</sub>), Bruker AV-400 (<sup>19</sup>F – 376.50 MHz)

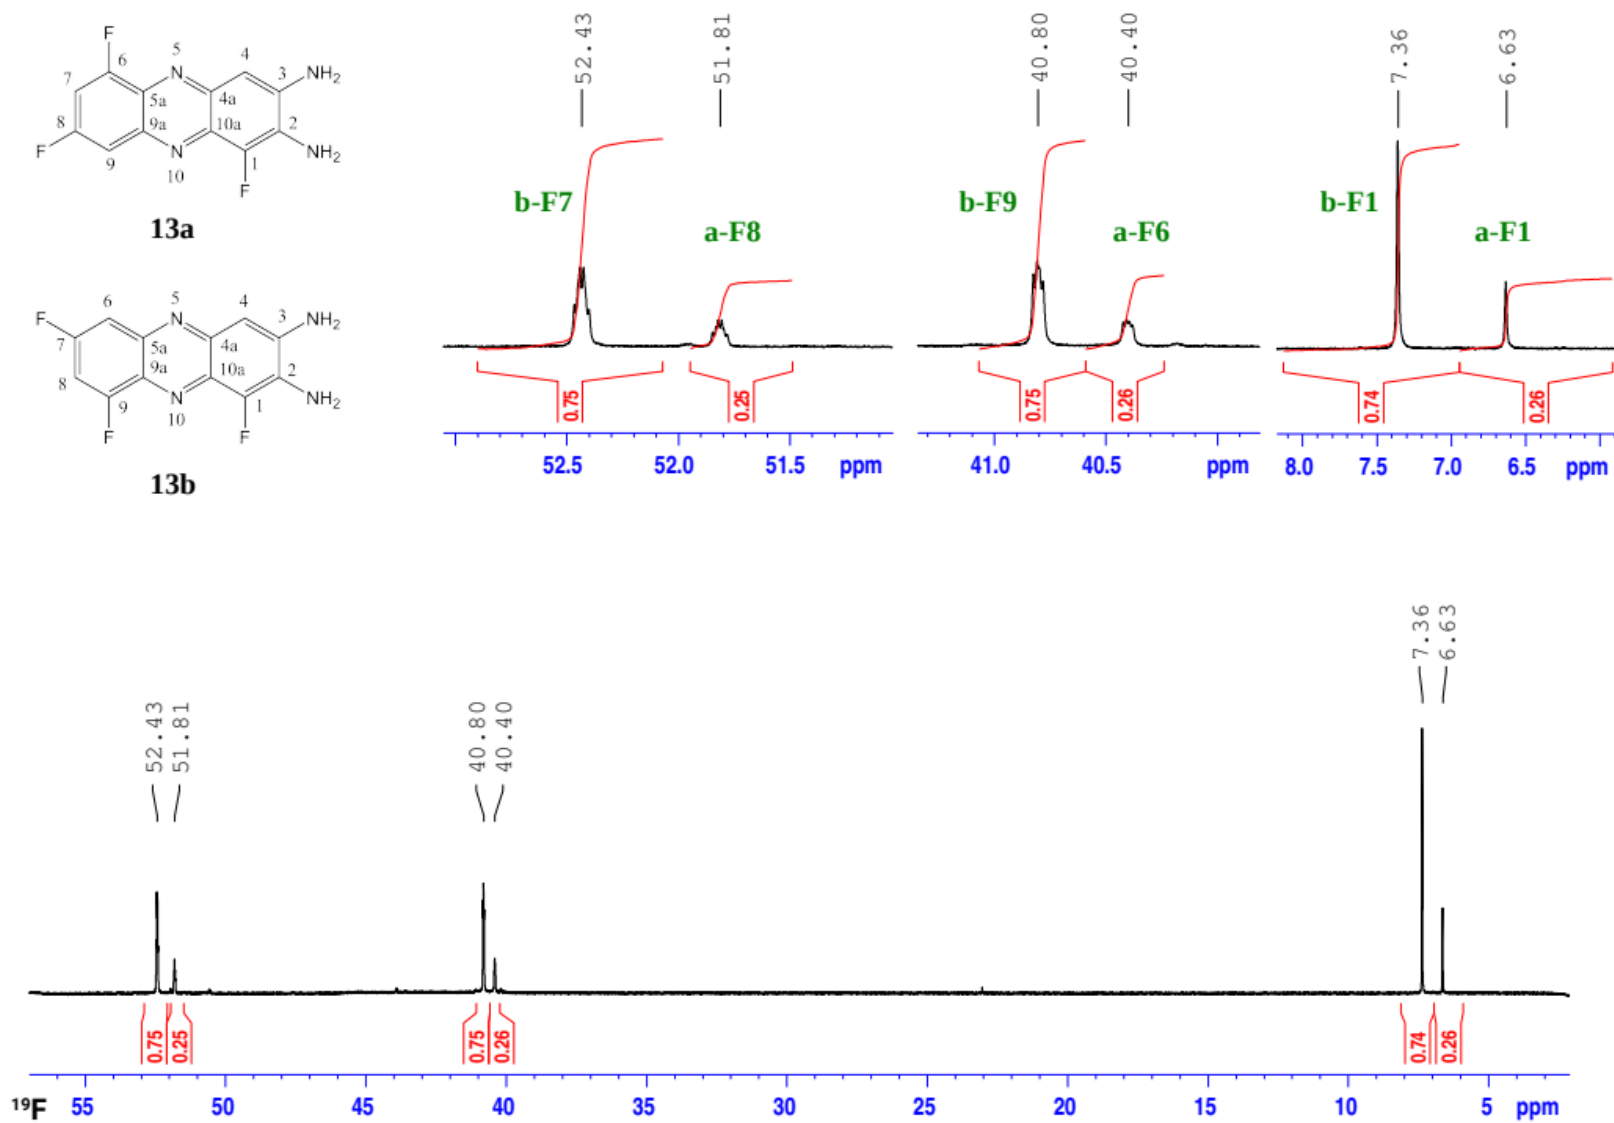

Multiplets in  $^{19}\text{F}$  NMR spectrum of **13a** and **13b** (DMSO- $d_6$ ), Bruker AV-400 ( $^{19}\text{F}$  – 376.50 MHz)

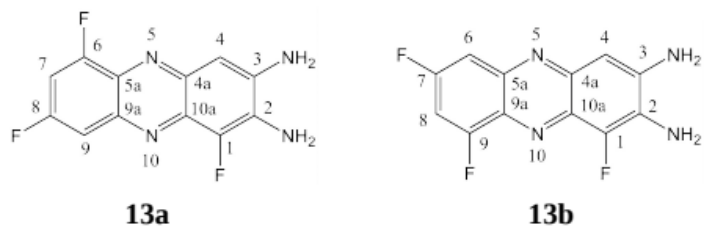

Gaussian multiplication LB=-4.0, GB=0.22

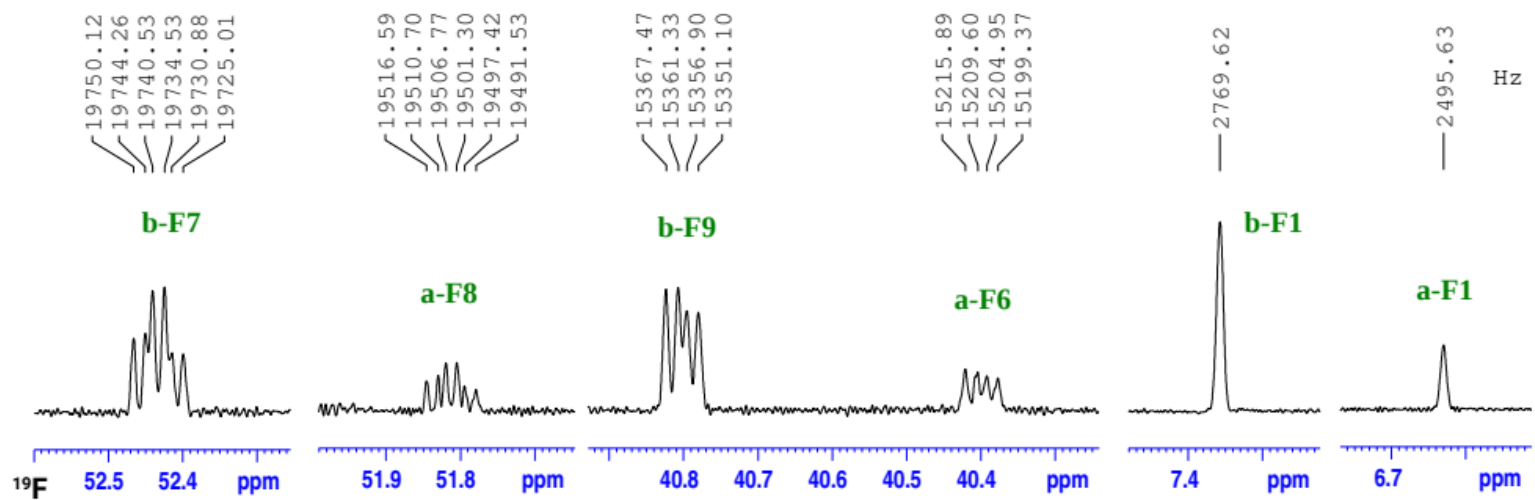

Red lines – simulated signals  
Blue lines – real signals

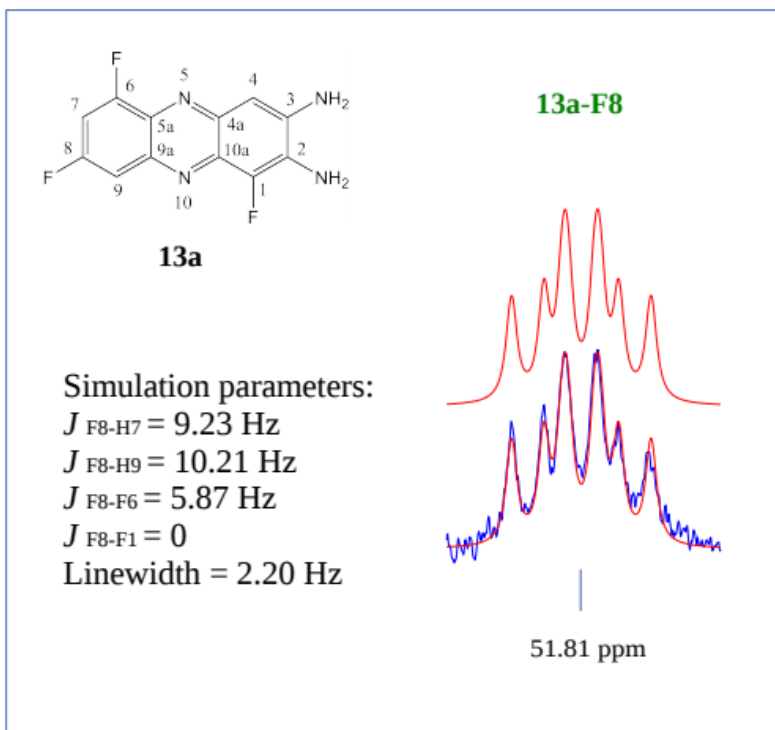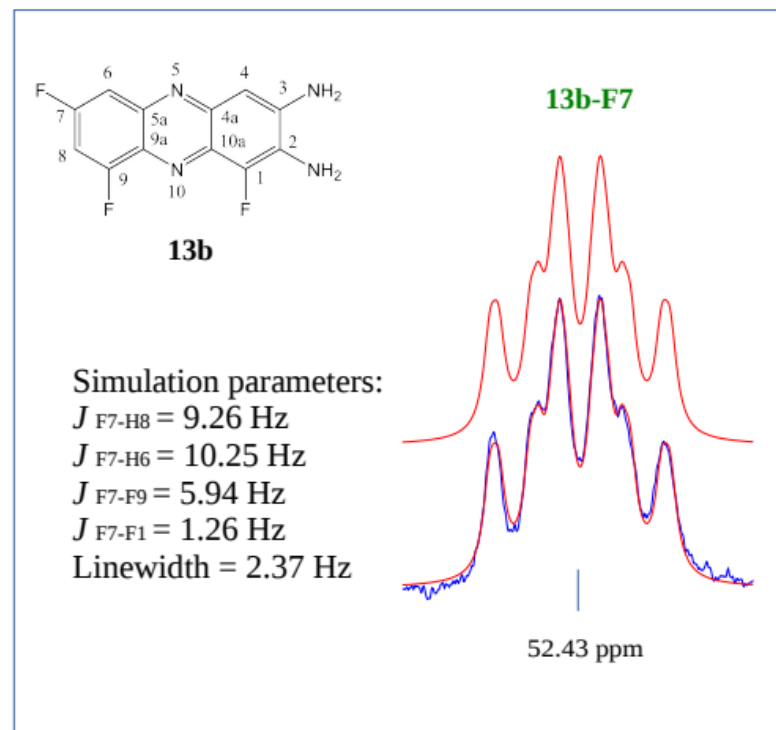

$^{19}\text{F}\{^1\text{H}\}$  NMR spectrum of **13a** and **13b** (DMSO- $d_6$ ), Bruker AV-400 ( $^{19}\text{F}$  – 376.50 MHz,  $^1\text{H}$  – 400.13 MHz)

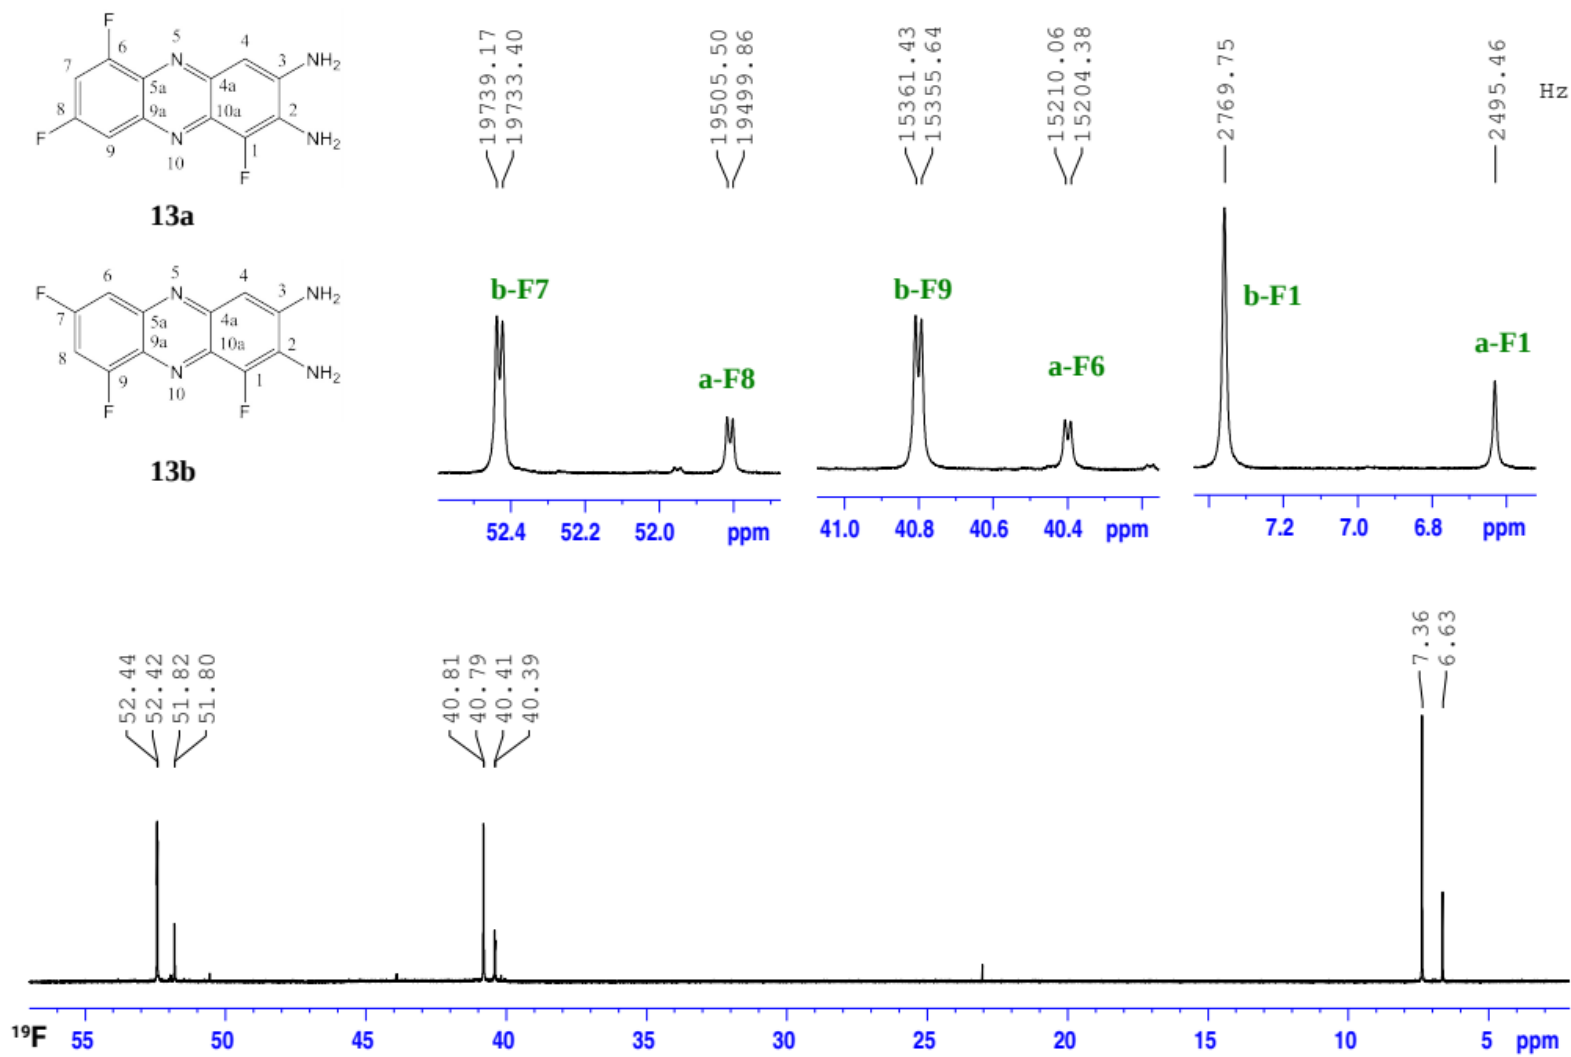

$^{13}\text{C}\{^1\text{H}\}$  NMR spectrum of **13a** and **13b** (DMSO- $d_6$ ), Bruker DRX-500 ( $^1\text{H}$  – 500.13,  $^{13}\text{C}$  – 125.76 MHz)

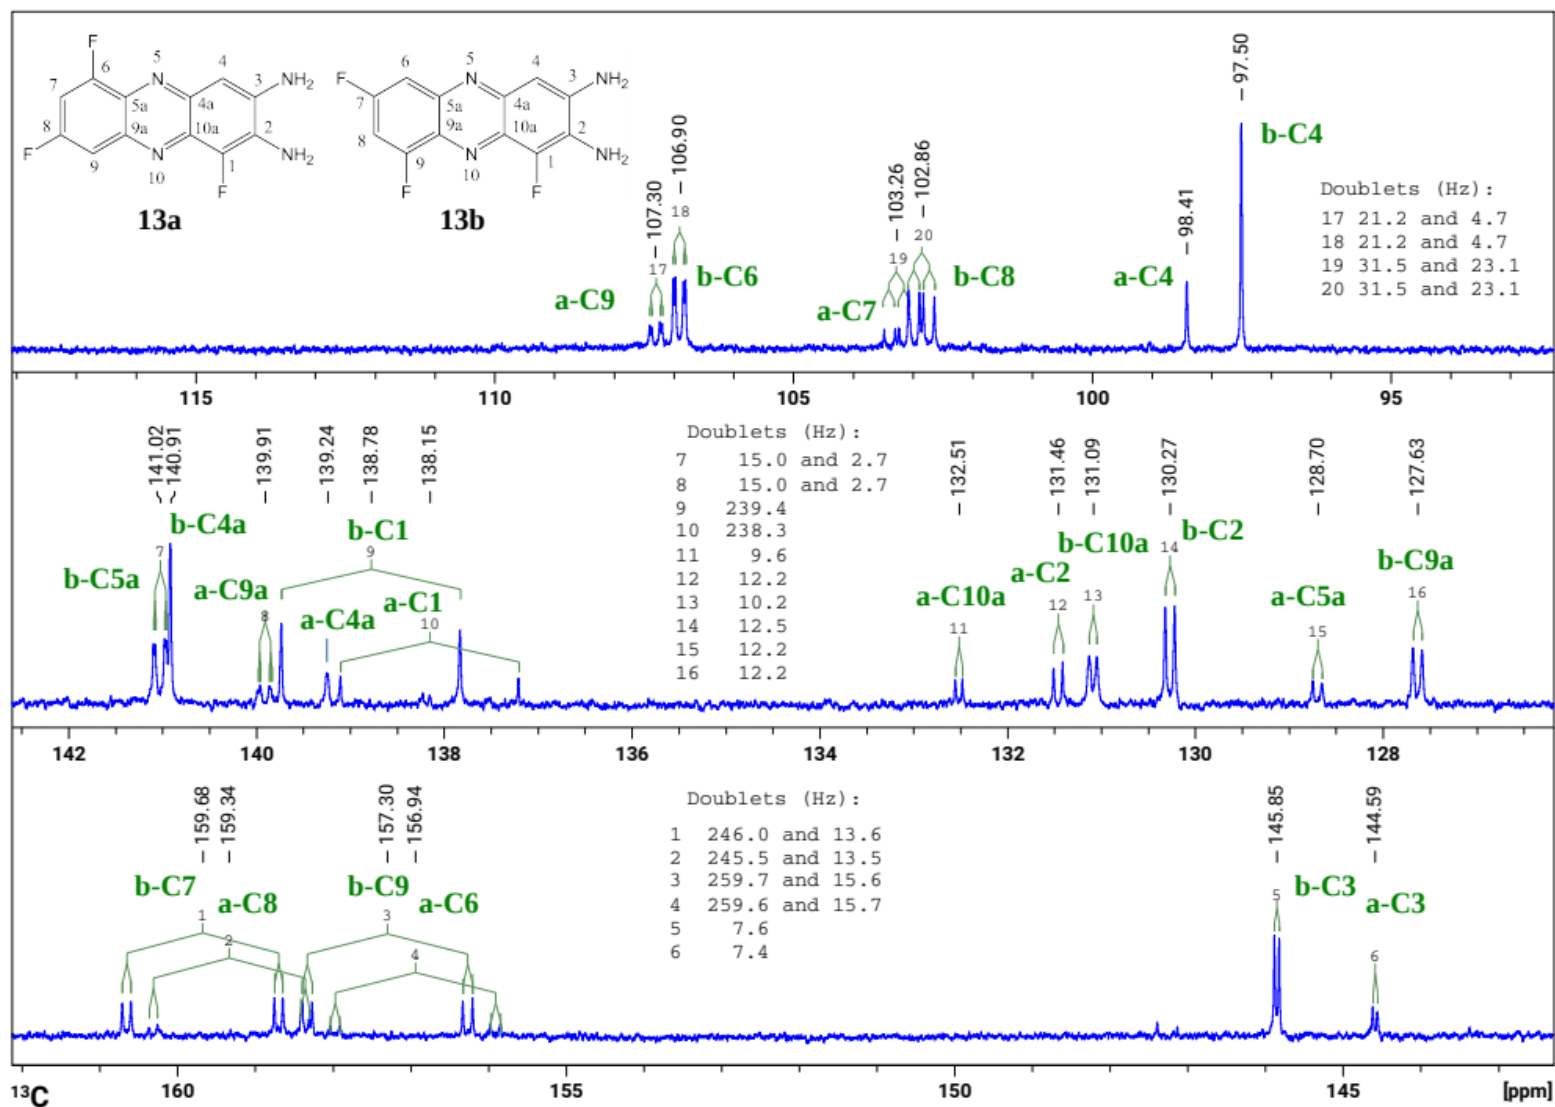

The part of the  $^1\text{H}$ - $^{13}\text{C}$  correlation NMR spectra of **13a** and **13b** (DMSO- $d_6$ ), Bruker AV-400 ( $^1\text{H}$  – 400.13,  $^{13}\text{C}$  – 100.61 MHz)

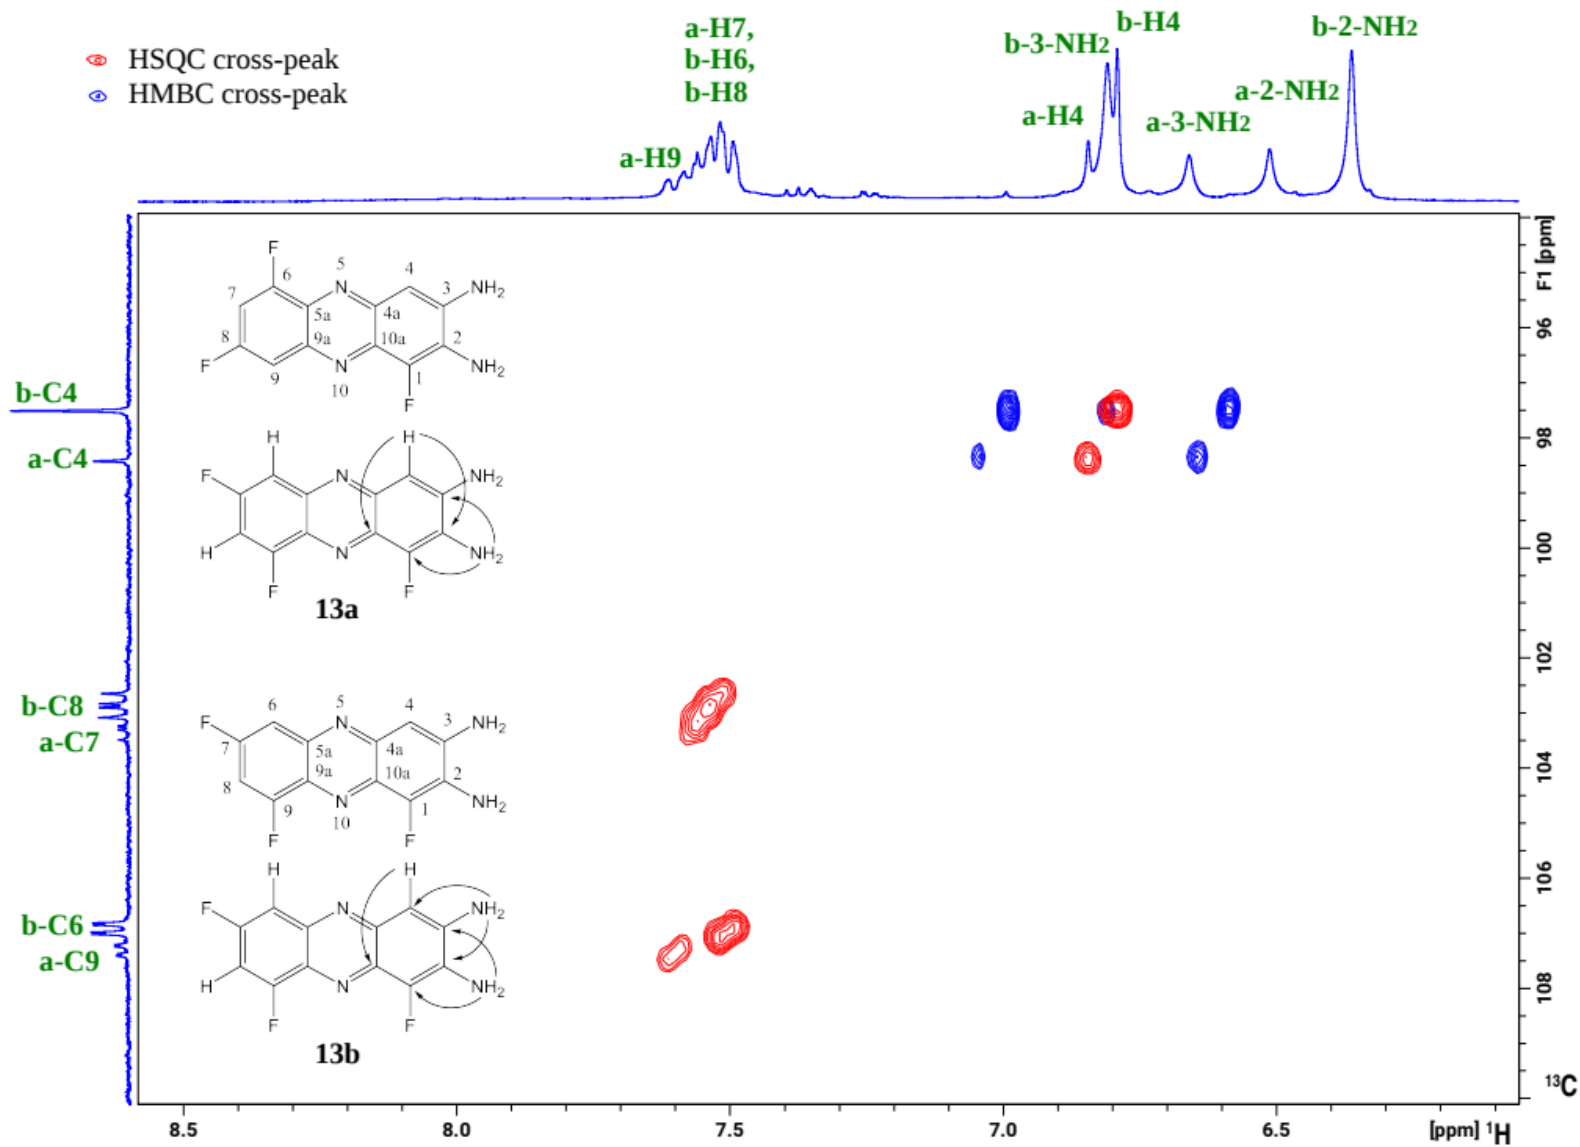

The part of the  $^1\text{H}$ - $^{13}\text{C}$  correlation NMR spectra of **13a** and **13b** (DMSO- $d_6$ ), Bruker AV-400 ( $^1\text{H}$  – 400.13,  $^{13}\text{C}$  – 100.61 MHz)

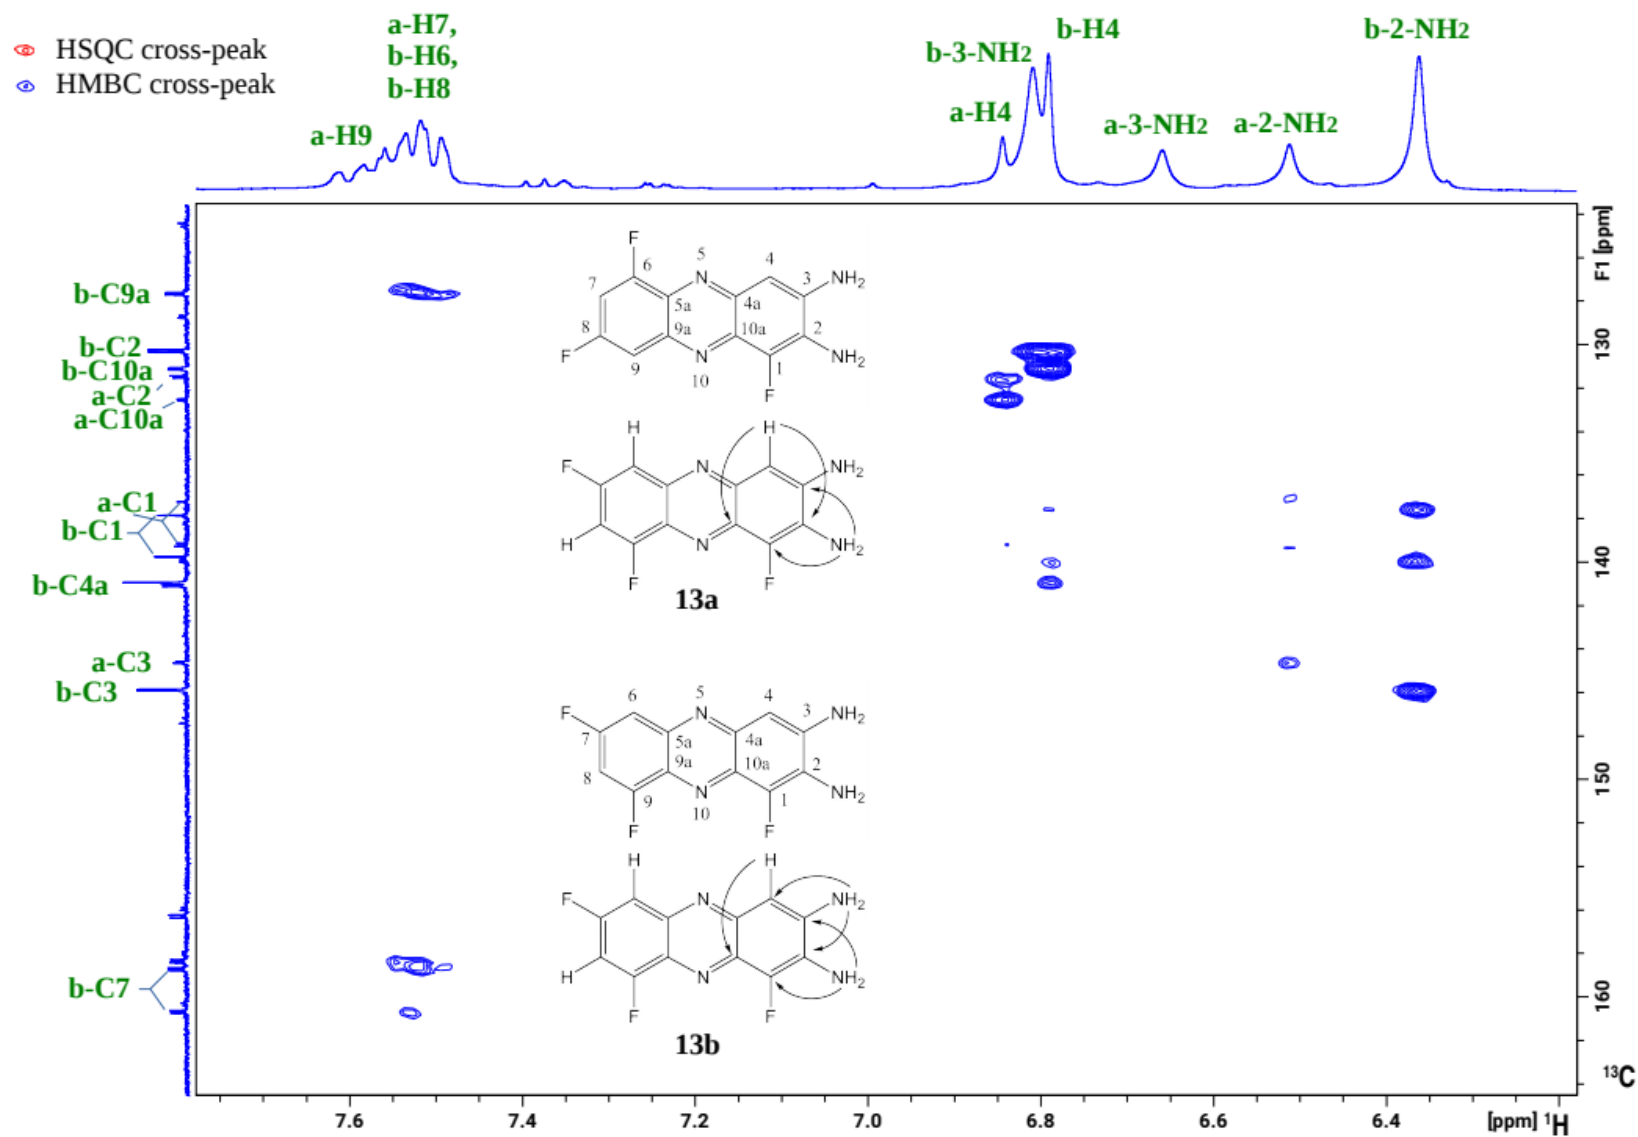





The part of the  $^1\text{H}$ - $^{15}\text{N}$  HMBC spectrum of **13a** and **13b** (DMSO- $d_6$ ), Bruker AV-600 ( $^1\text{H}$  – 600.30,  $^{15}\text{N}$  – 60.83 MHz)

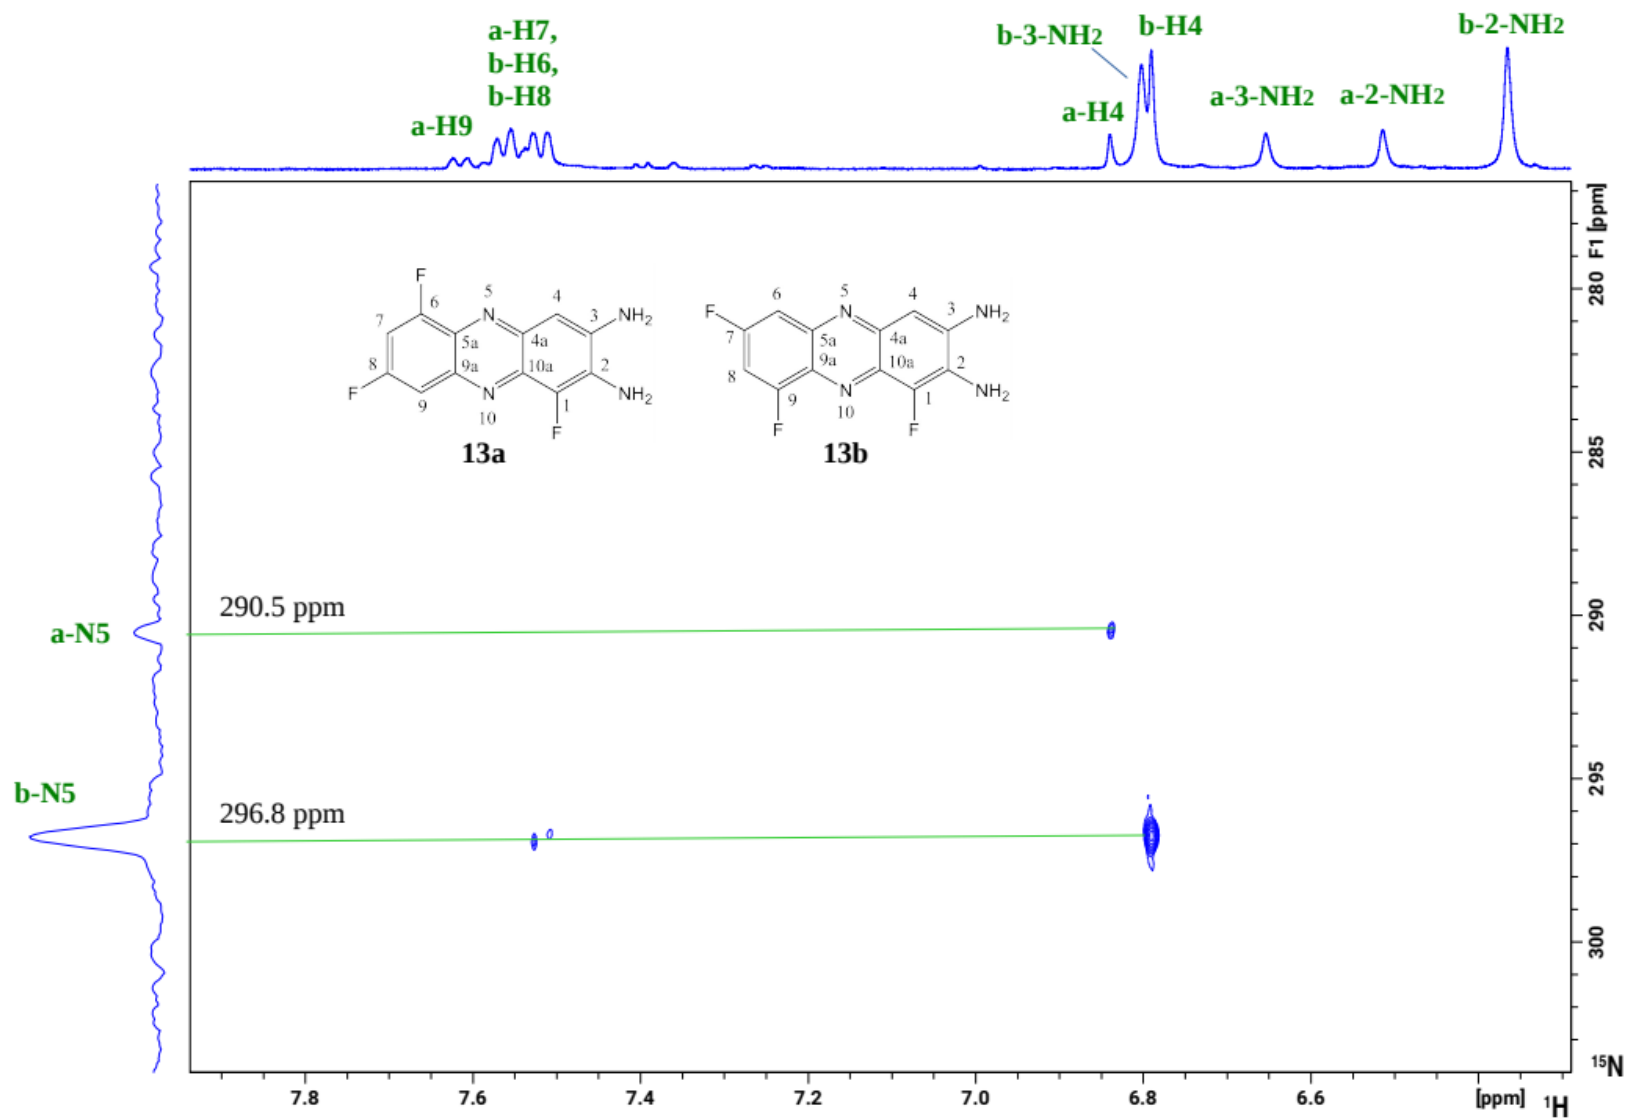

$^1\text{H}$  NMR spectrum of **14** (DMSO- $d_6$ ), Bruker AV-600 ( $^1\text{H}$  – 600.30 MHz)

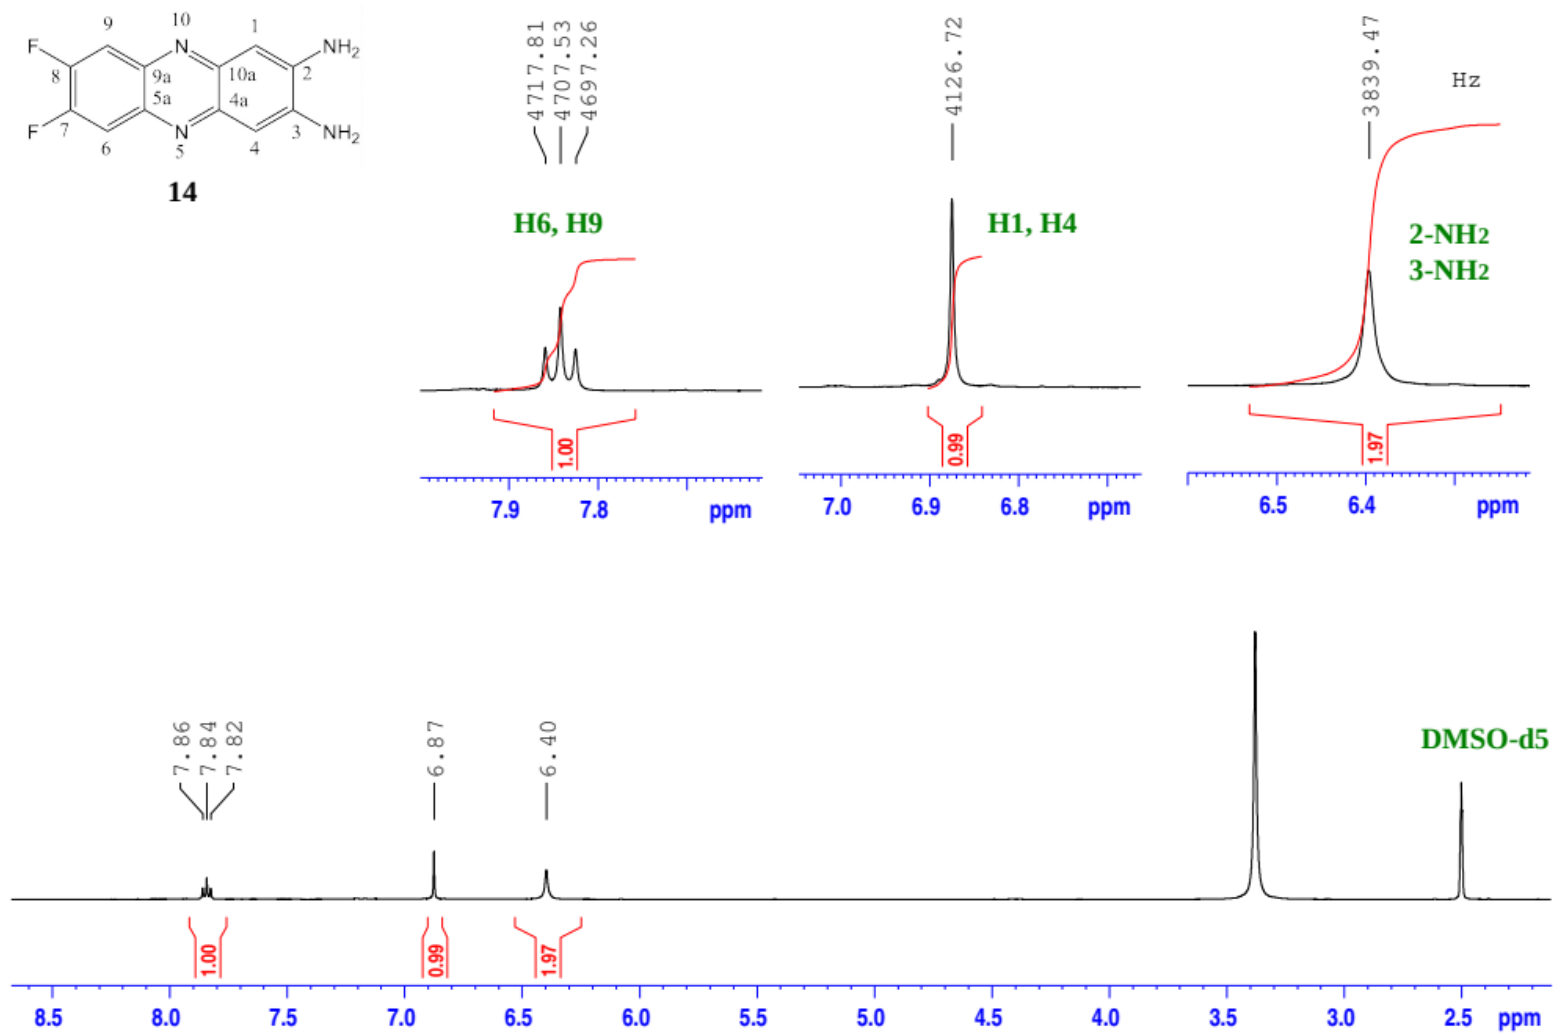

$^{19}\text{F}$  NMR spectrum of **14** (DMSO-d<sub>6</sub>), Bruker AV-300 ( $^{19}\text{F}$  – 282.40 MHz)

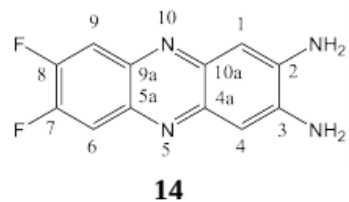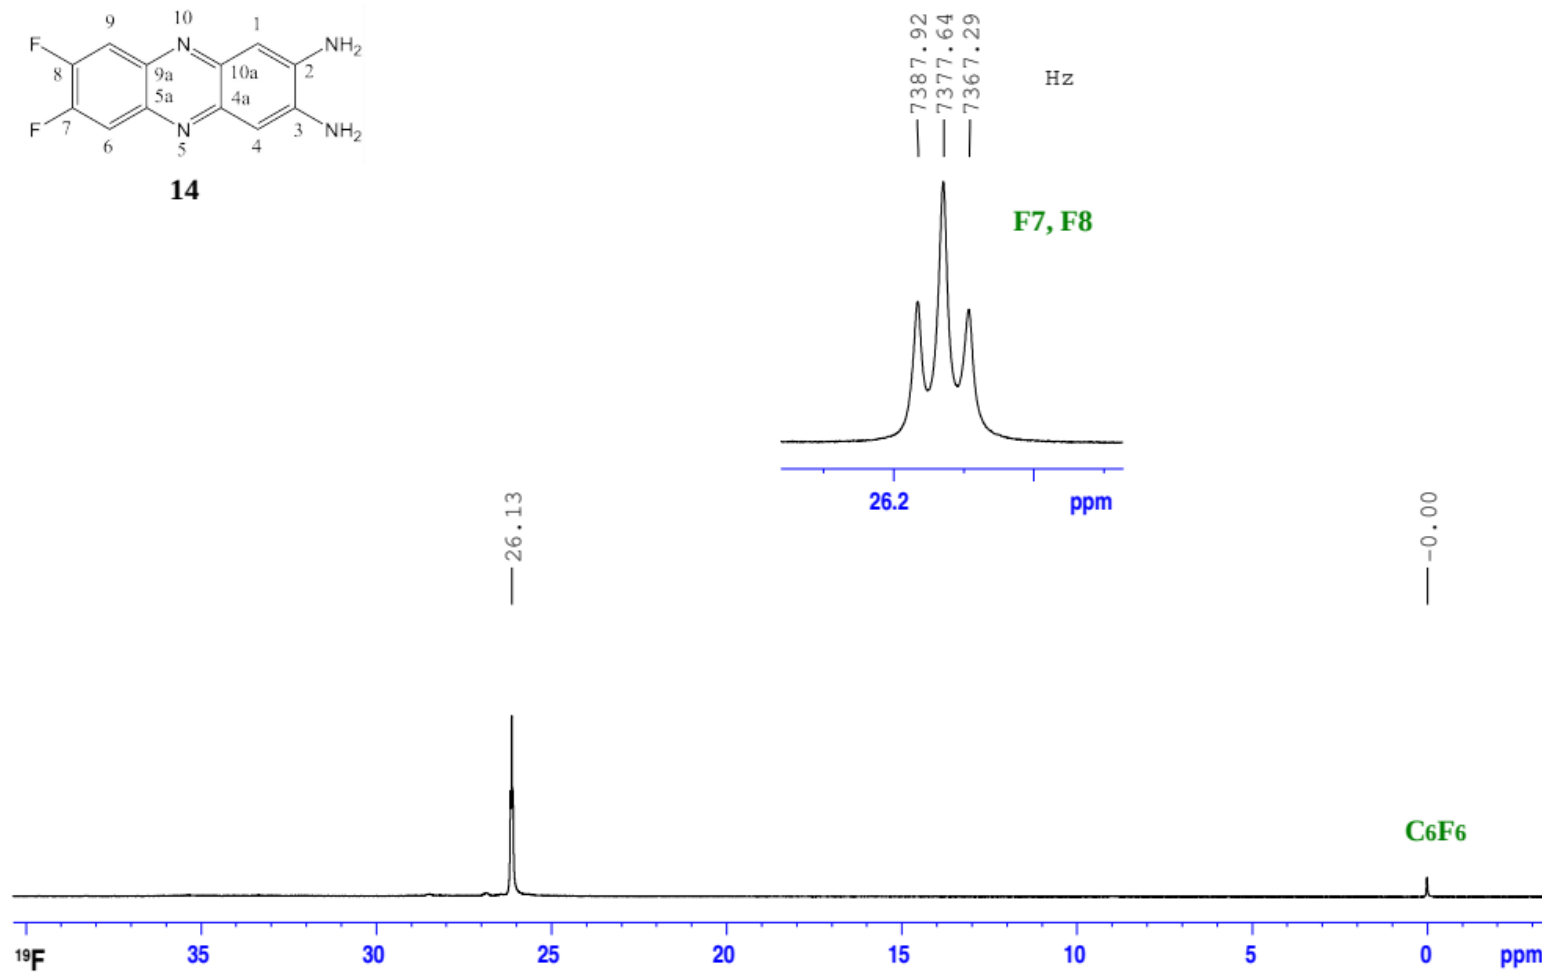

$^{13}\text{C}\{^1\text{H}\}$  NMR spectrum of **14** (DMSO-d<sub>6</sub>), Bruker AV-600 ( $^1\text{H}$  – 600.30,  $^{13}\text{C}$  – 150.95 MHz)

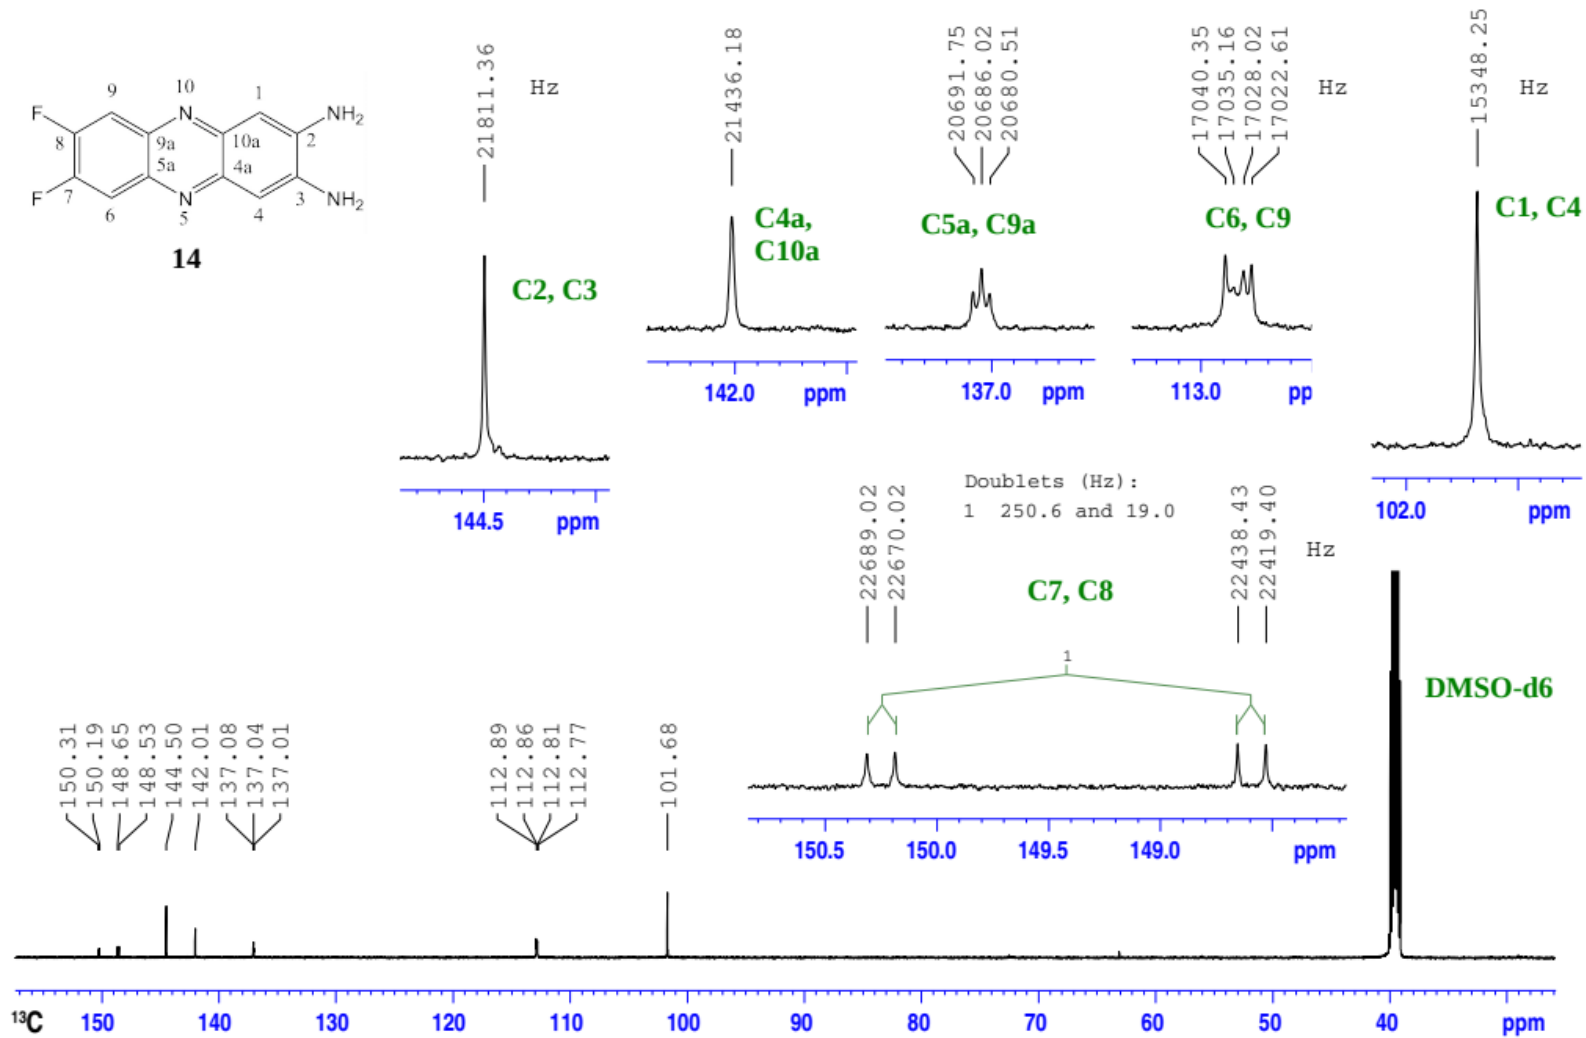

$^1\text{H}$ - $^{13}\text{C}$  correlation NMR spectra of **14** (DMSO- $d_6$ ), Bruker AV-600 ( $^1\text{H}$  – 600.30,  $^{13}\text{C}$  – 150.95 MHz)

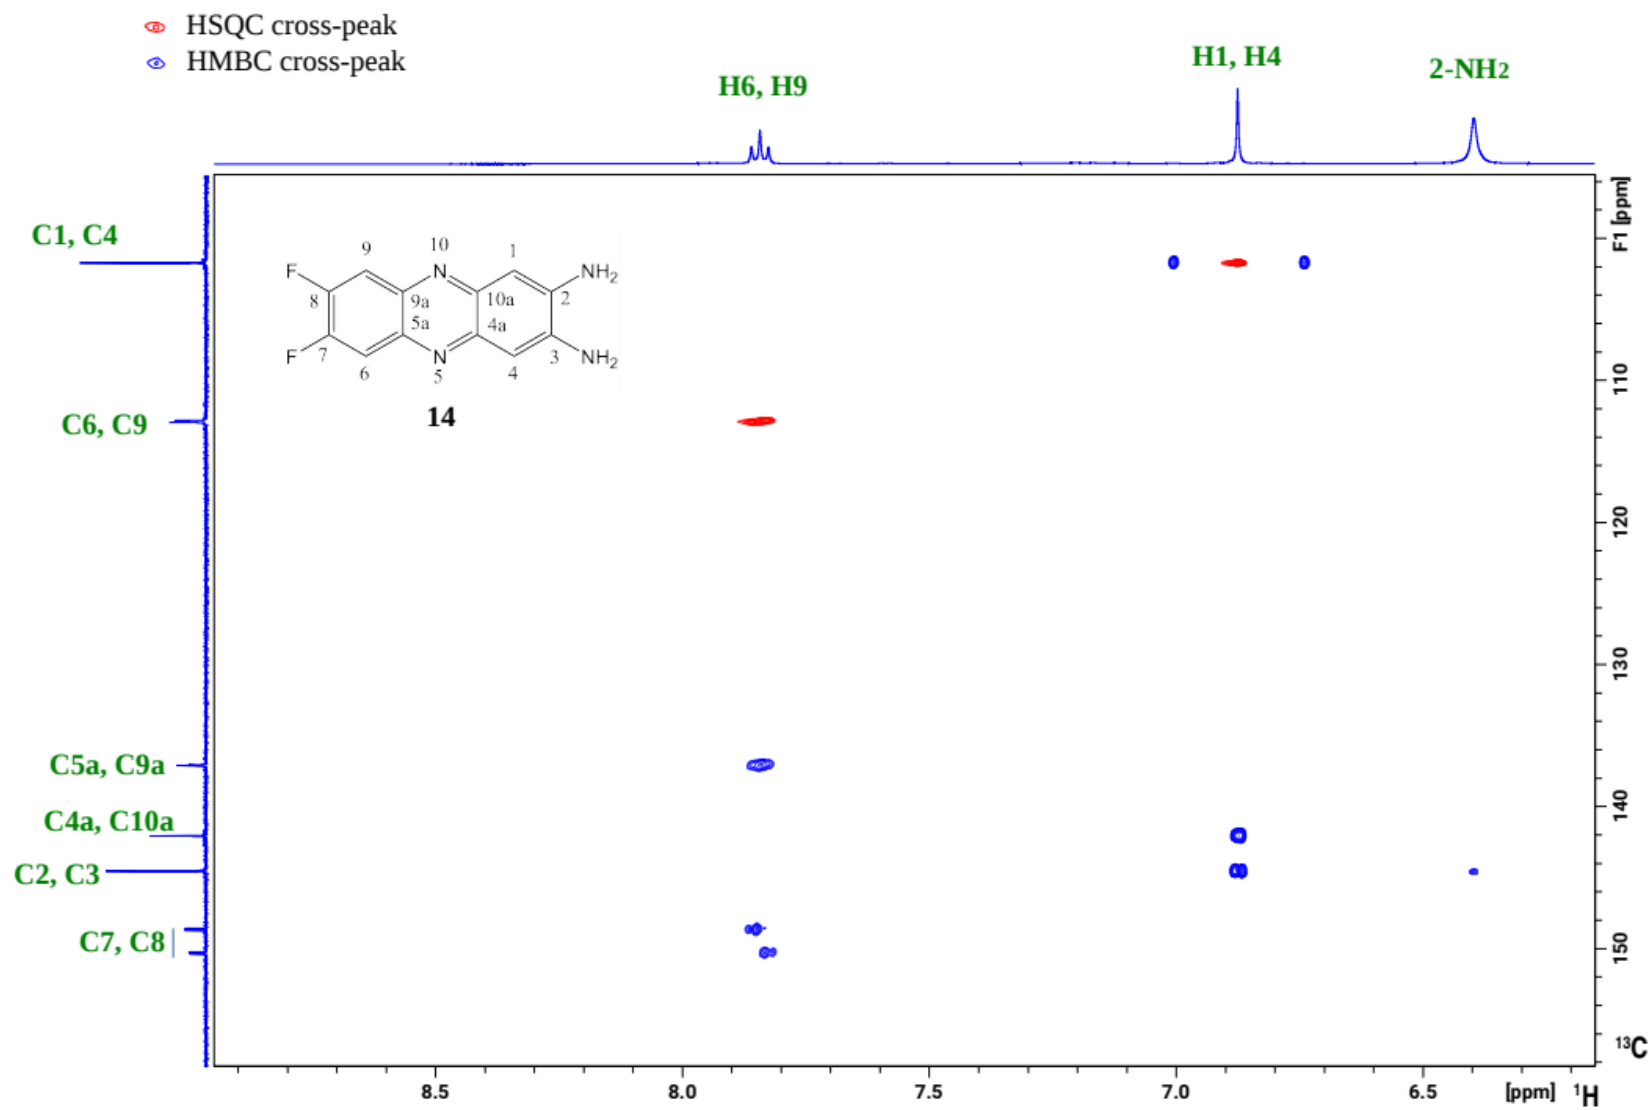

<sup>1</sup>H NMR spectrum of **15a** and **15b** (DMSO-d<sub>6</sub>), Bruker AV-600 (<sup>1</sup>H – 600.30 MHz)

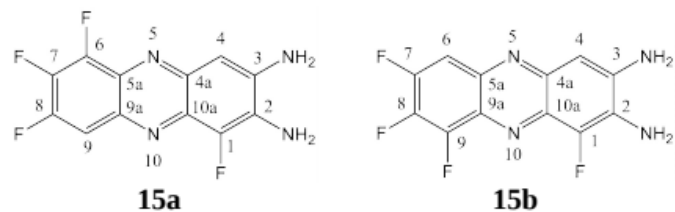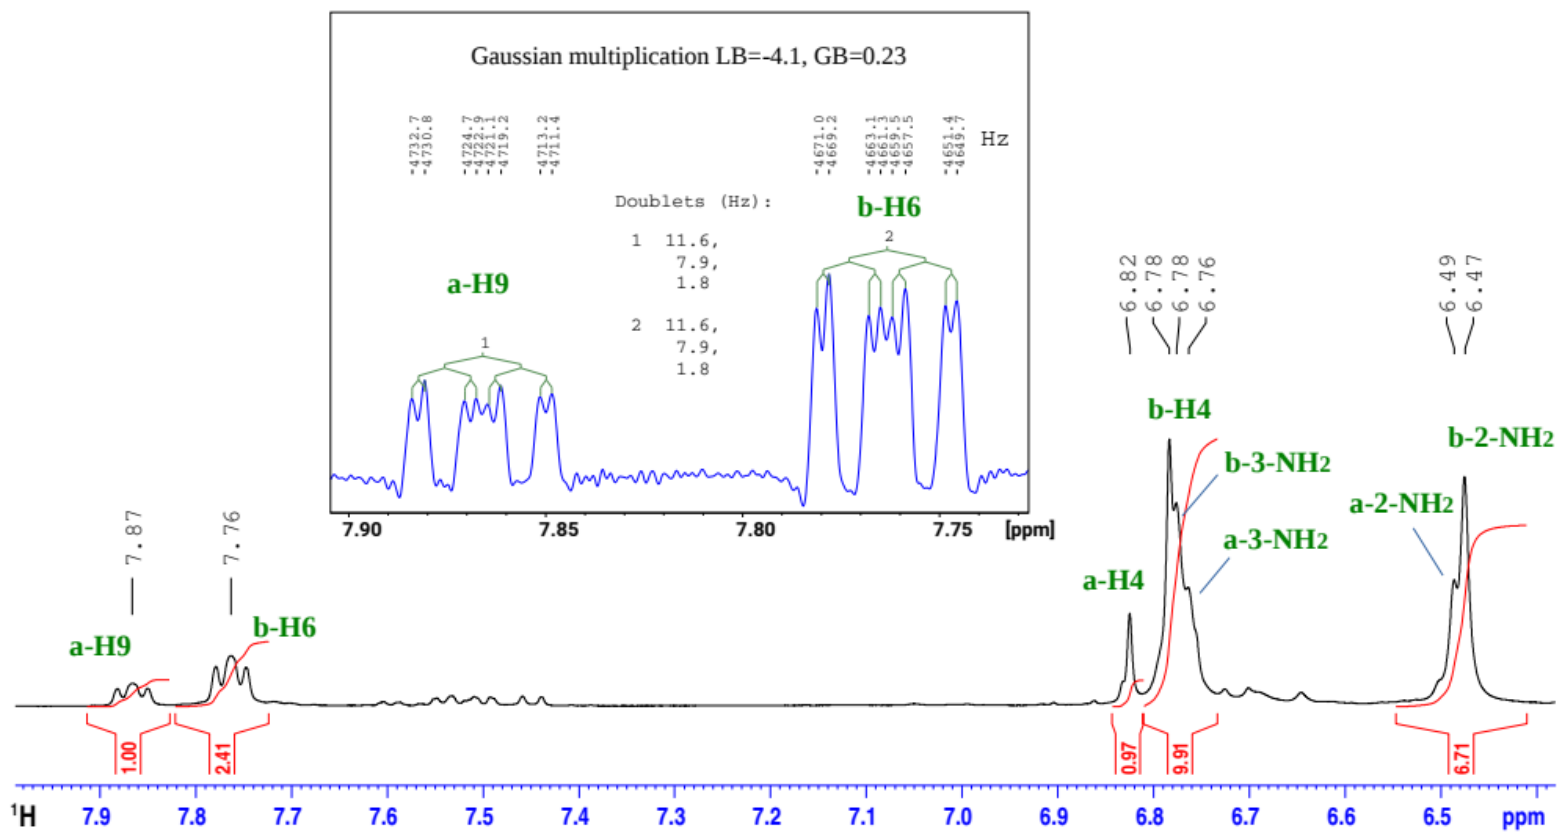

<sup>19</sup>F NMR spectrum of **15a** and **15b** (DMSO-d<sub>6</sub>), Bruker AV-300 (<sup>19</sup>F – 282.40 MHz)

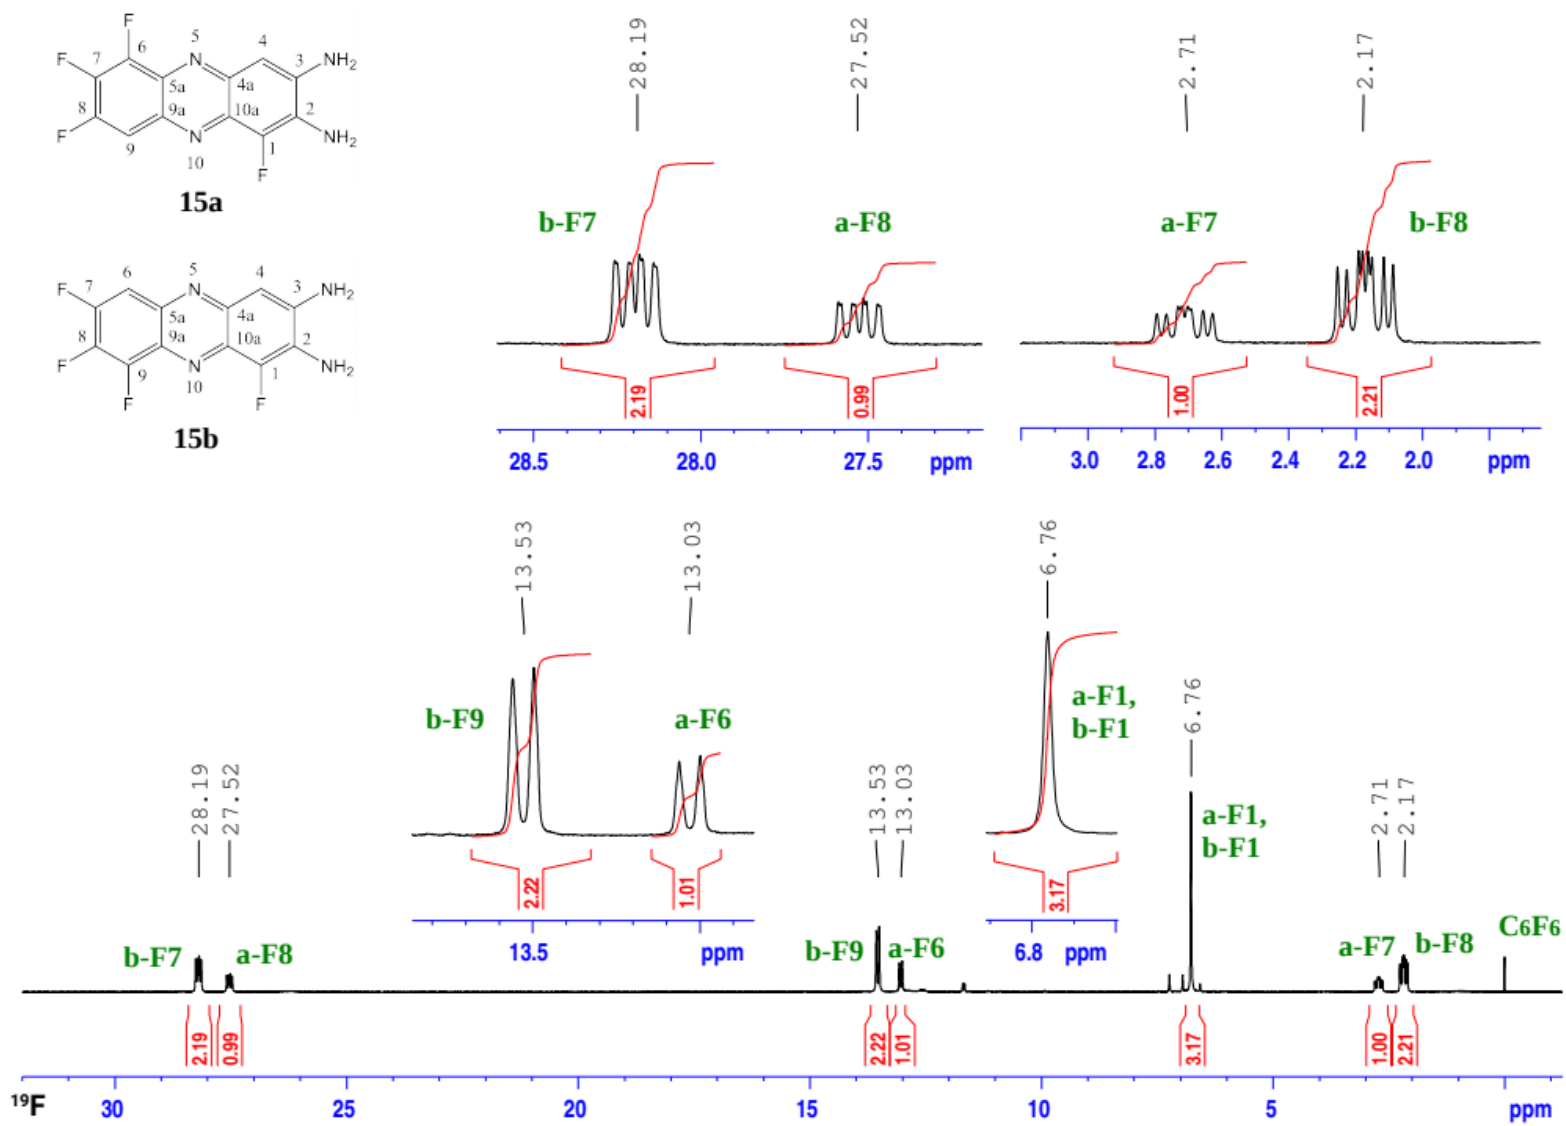

Multiplets in  $^{19}\text{F}$  NMR spectrum of **15a** and **15b** (DMSO- $d_6$ ), Bruker AV-300 ( $^{19}\text{F}$  – 282.40 MHz)

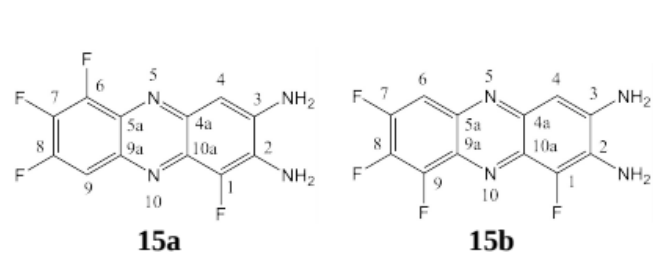

Gaussian multiplication LB= -2.0, GB=0.5

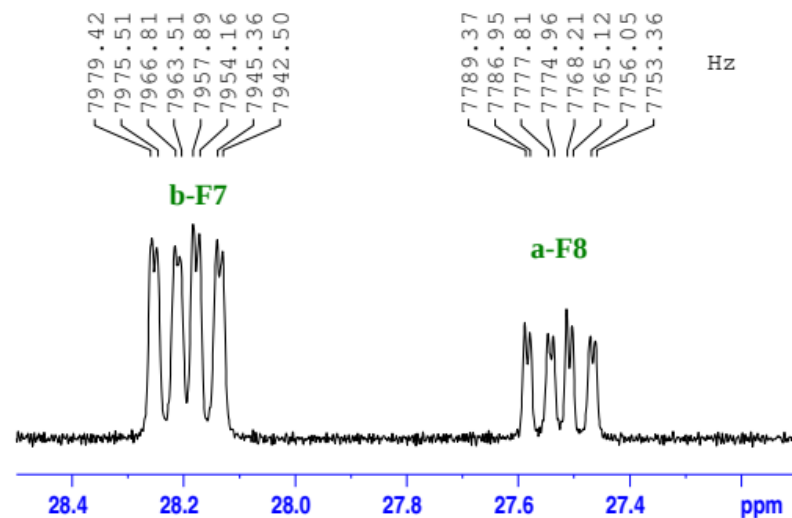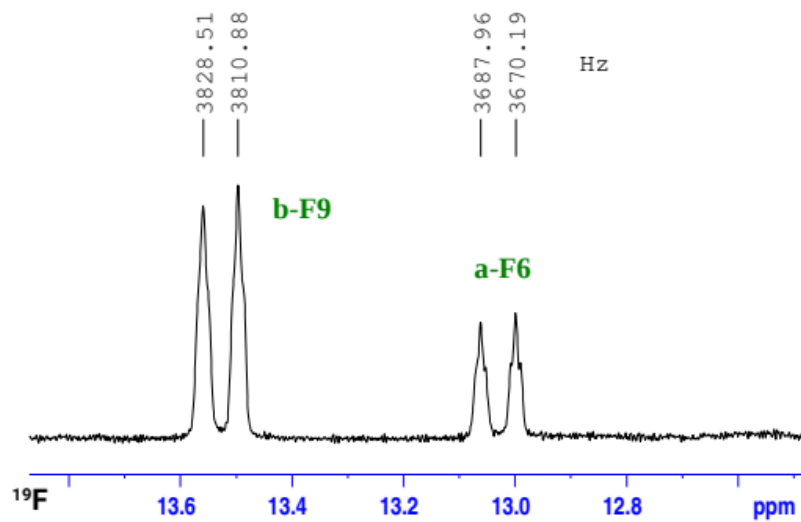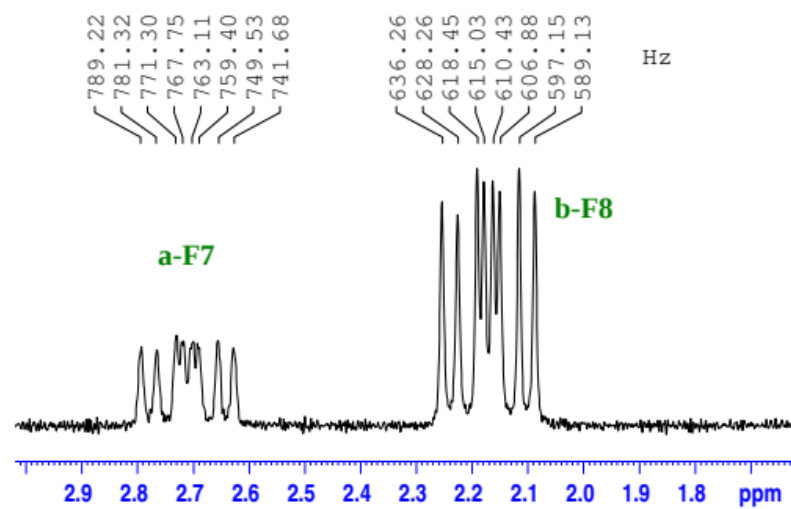



$^{19}\text{F}\{^1\text{H}\}$  NMR spectrum of **15a** and **15b** (DMSO- $d_6$ ), Bruker AV-300 ( $^{19}\text{F}$  – 282.40 MHz,  $^1\text{H}$  – 300.13 MHz)

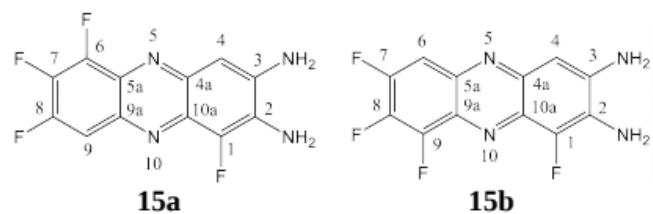

7966.95  
7964.11  
7945.77  
7942.71

7777.67  
7774.92  
7756.41  
7753.58

3824.39  
3821.35  
3806.58  
3803.50

3683.61  
3680.95  
3665.85  
3663.18

1905.00

778.24  
760.57  
756.87  
739.06

625.73  
607.92  
604.45  
586.63

Hz

**b-F7**

**a-F8**

**b-F9**

**a-F6**

**a-F1,  
b-F1**

**a-F7**

**b-F8**

Gaussian multiplication LB=-3.0, GB=0.3

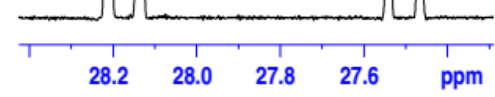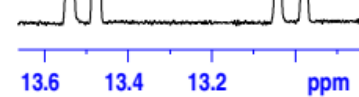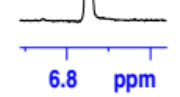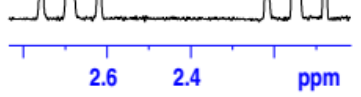

28.19  
27.52

13.53  
13.03

6.76

2.71  
2.17

2.19  
0.99

2.22  
1.01

3.17

1.00  
2.21

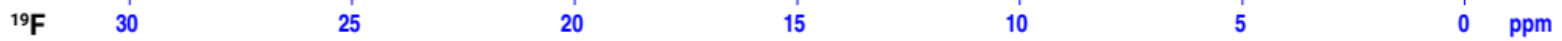

$^{13}\text{C}\{^1\text{H}\}$  NMR spectrum of **15a** and **15b** (DMSO- $d_6$ ), Bruker AV-600 ( $^1\text{H}$  – 600.30,  $^{13}\text{C}$  – 150.95 MHz)

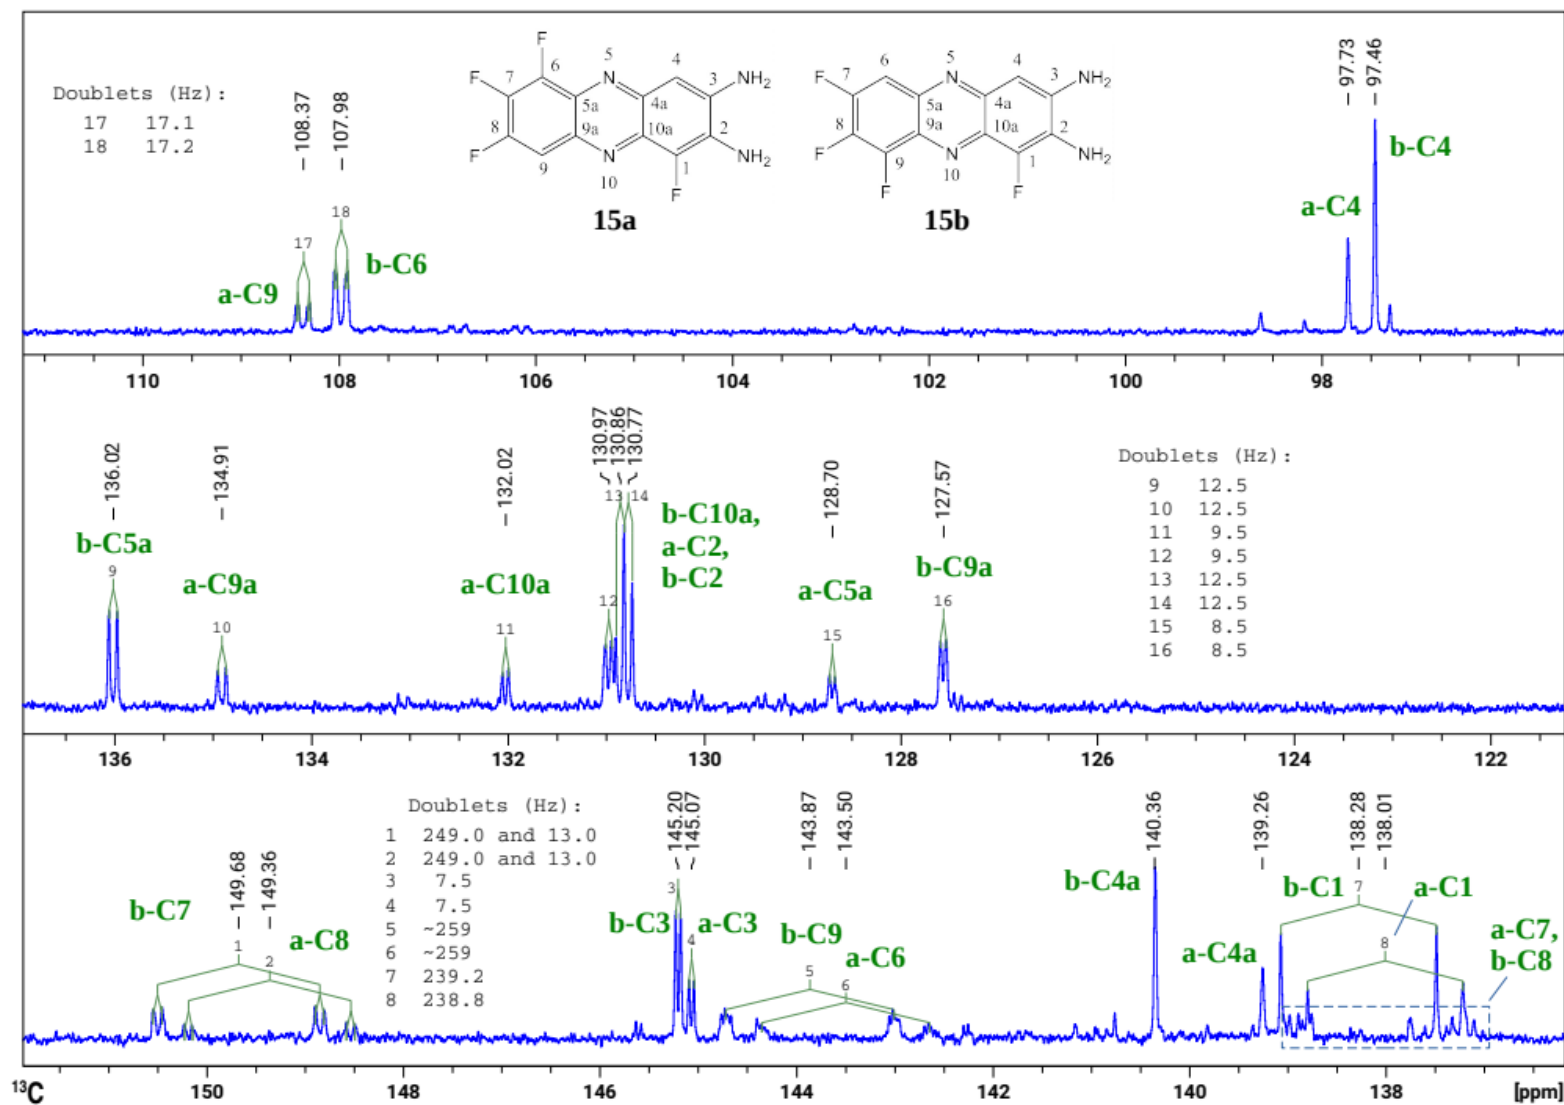

$^1\text{H}$ - $^{13}\text{C}$  correlation NMR spectra of **15a** and **15b** (DMSO- $d_6$ ), Bruker AV-600 ( $^1\text{H}$  – 600.30,  $^{13}\text{C}$  – 150.95 MHz)

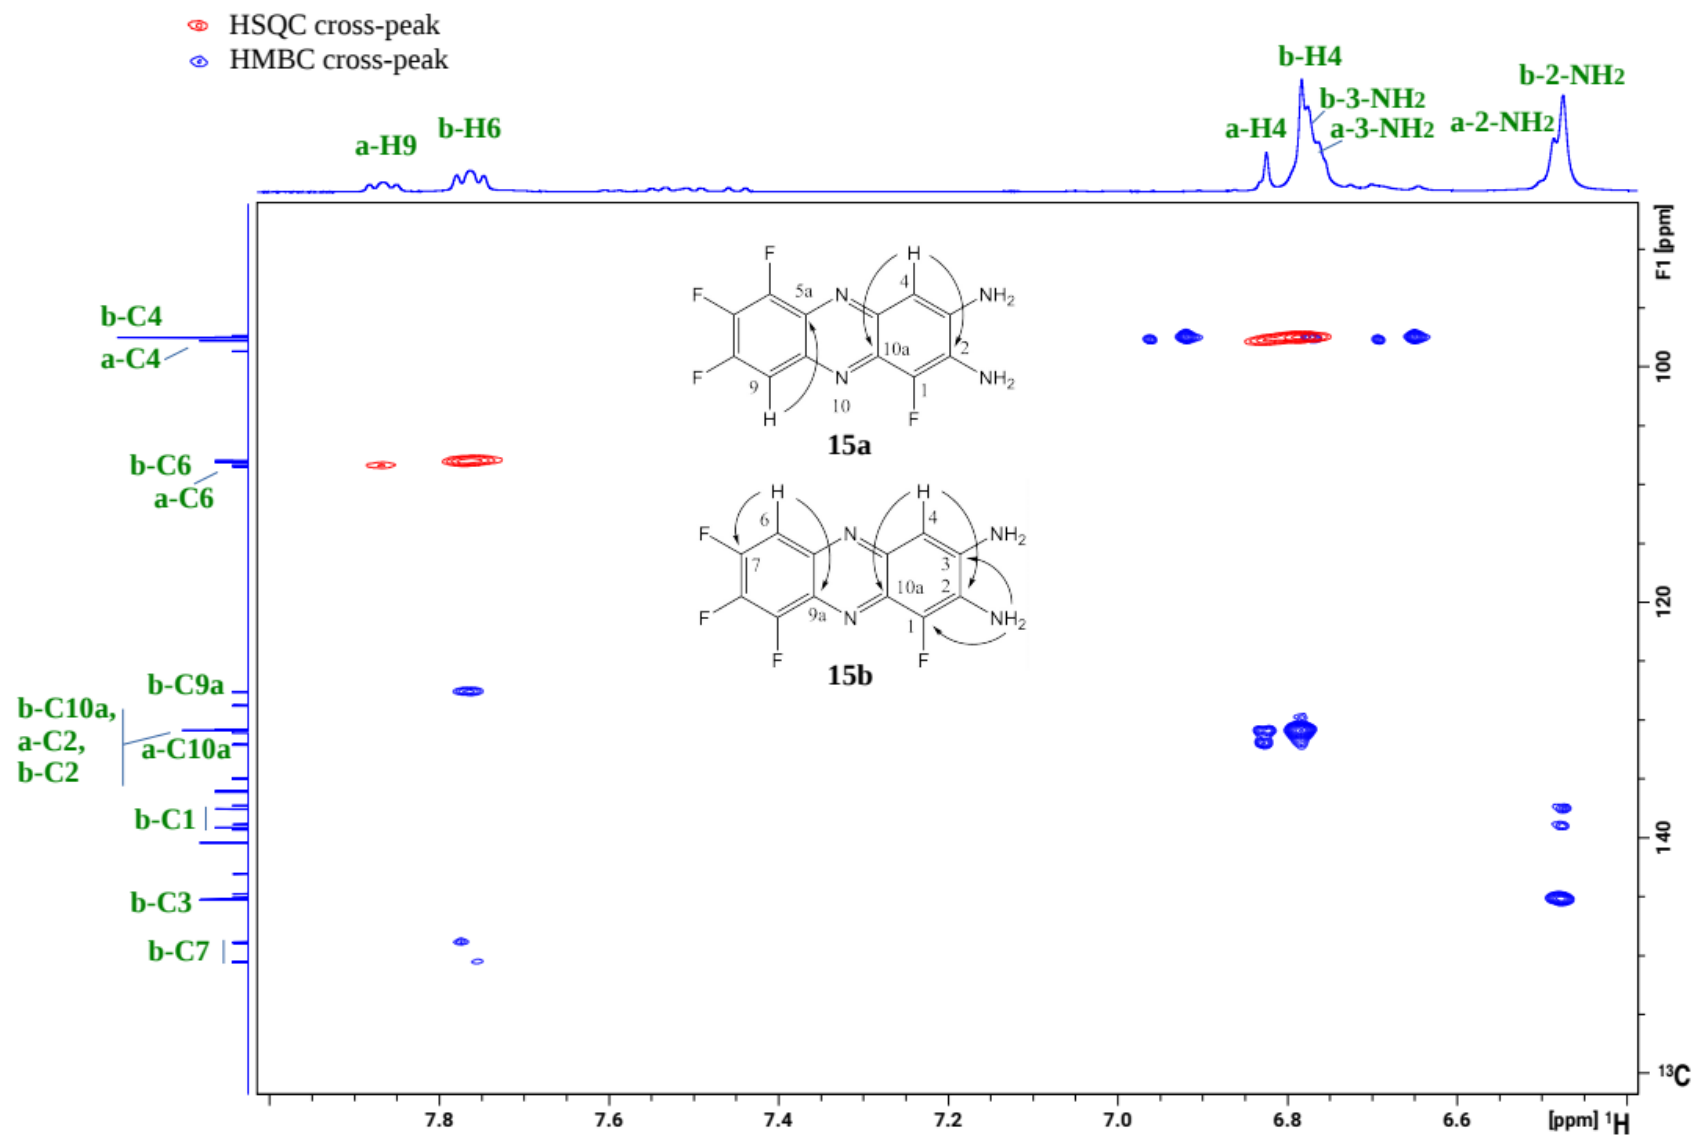

The part of the  $^1\text{H}$ - $^{15}\text{N}$  HMBC spectrum of **15a** and **15b** (DMSO- $d_6$ ), Bruker AV-600 ( $^1\text{H}$  – 600.30,  $^{15}\text{N}$  – 60.83 MHz)

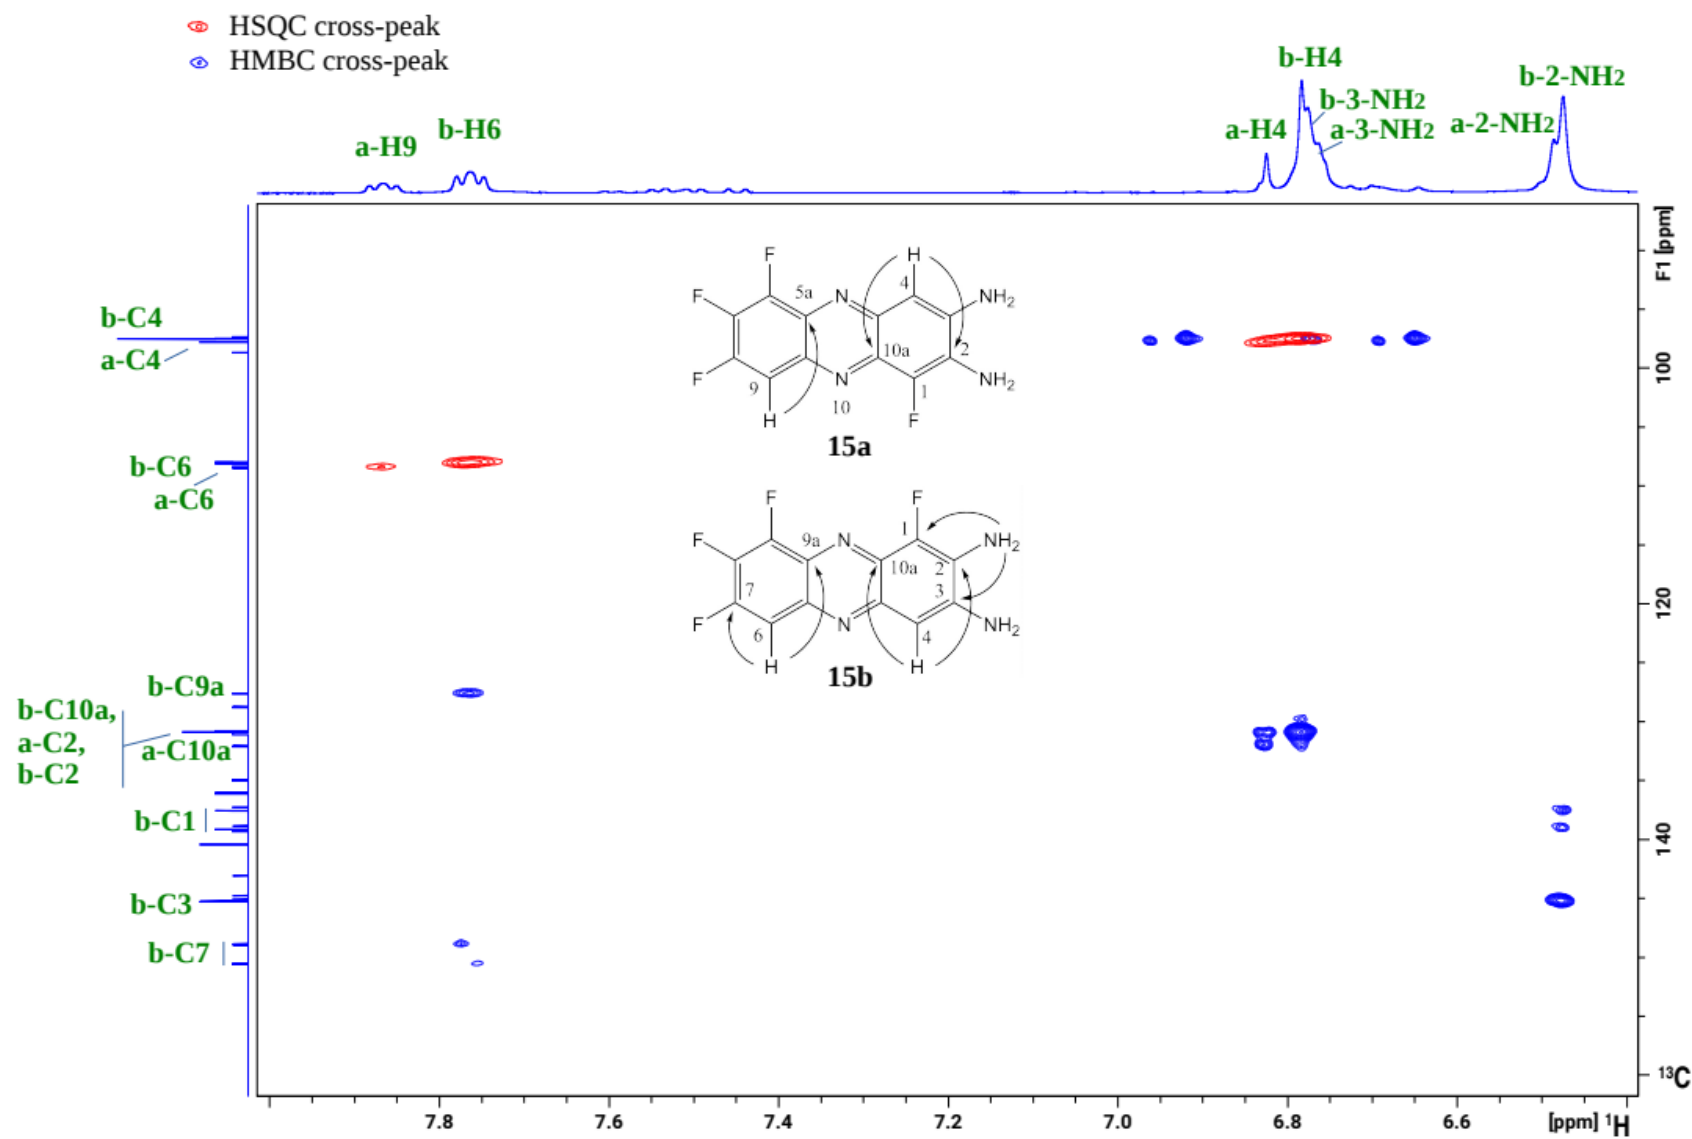

The part of the  $^1\text{H}$ - $^{15}\text{N}$  HMBC spectrum of **15a** and **15b** (DMSO- $d_6$ ), Bruker AV-600 ( $^1\text{H}$  – 600.30,  $^{15}\text{N}$  – 60.83 MHz)

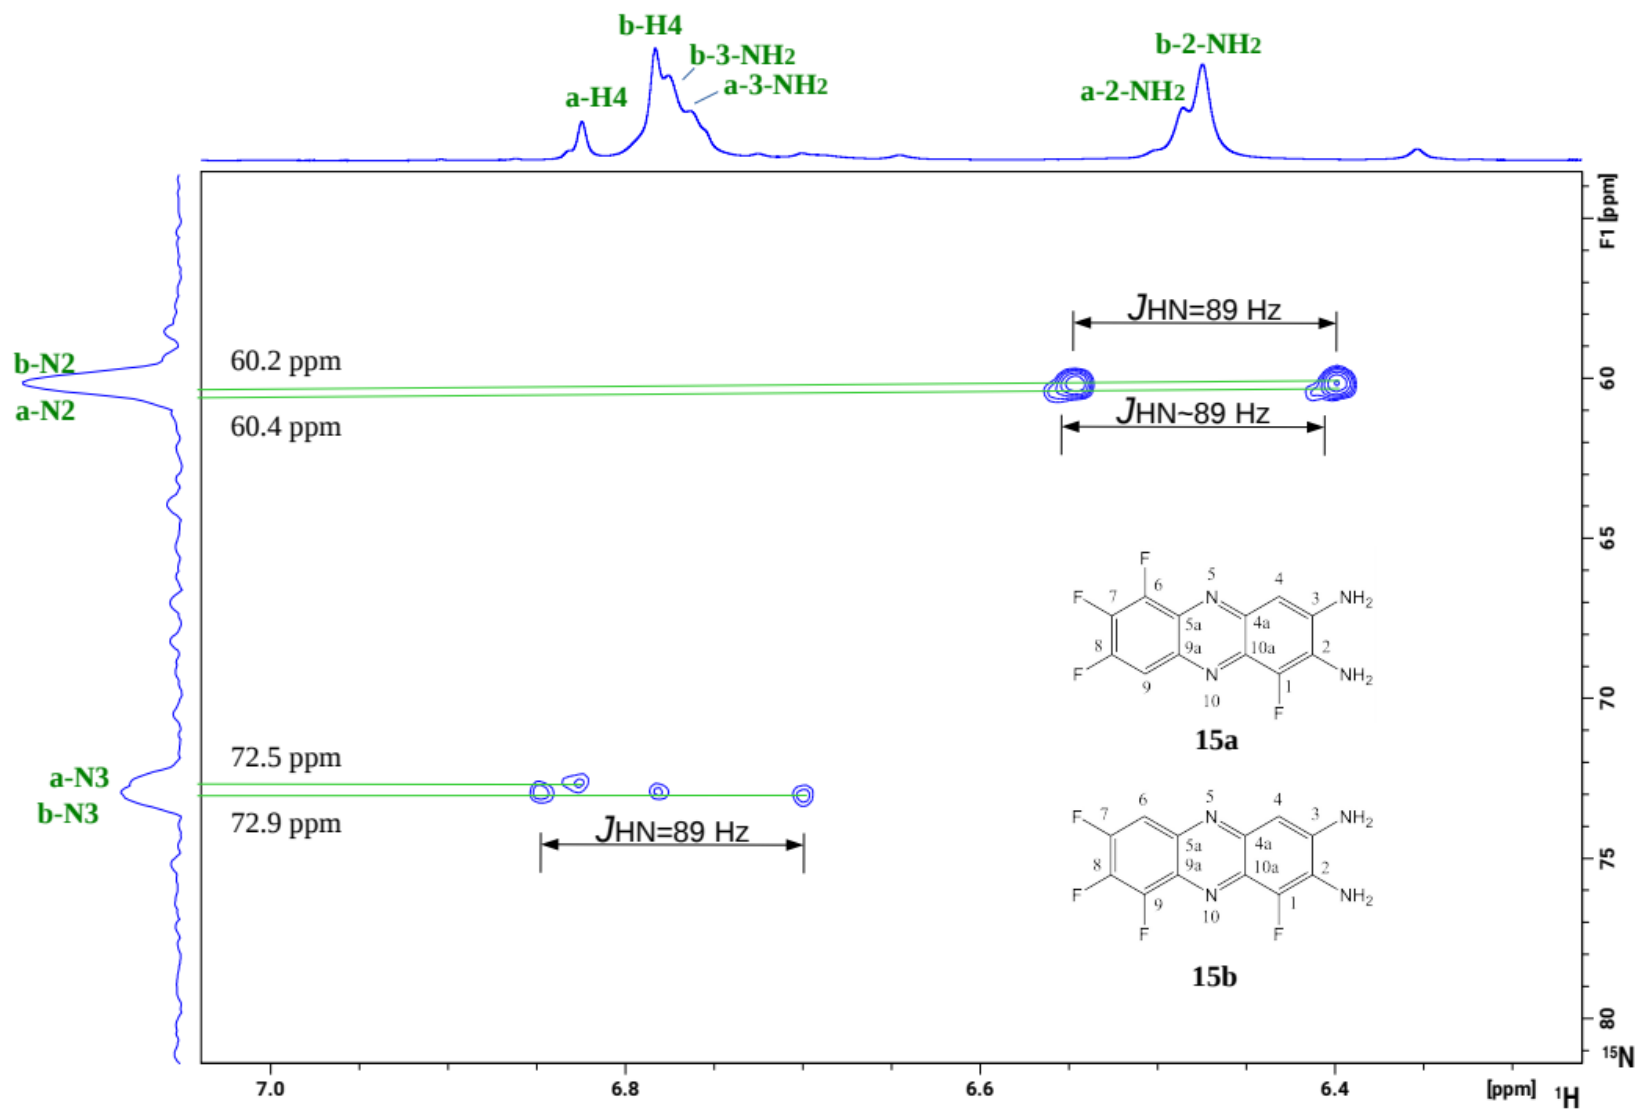

The part of the  $^1\text{H}$ - $^{15}\text{N}$  HMBC spectrum of **15a** and **15b** (DMSO- $d_6$ ), Bruker AV-600 ( $^1\text{H}$  – 600.30,  $^{15}\text{N}$  – 60.83 MHz)

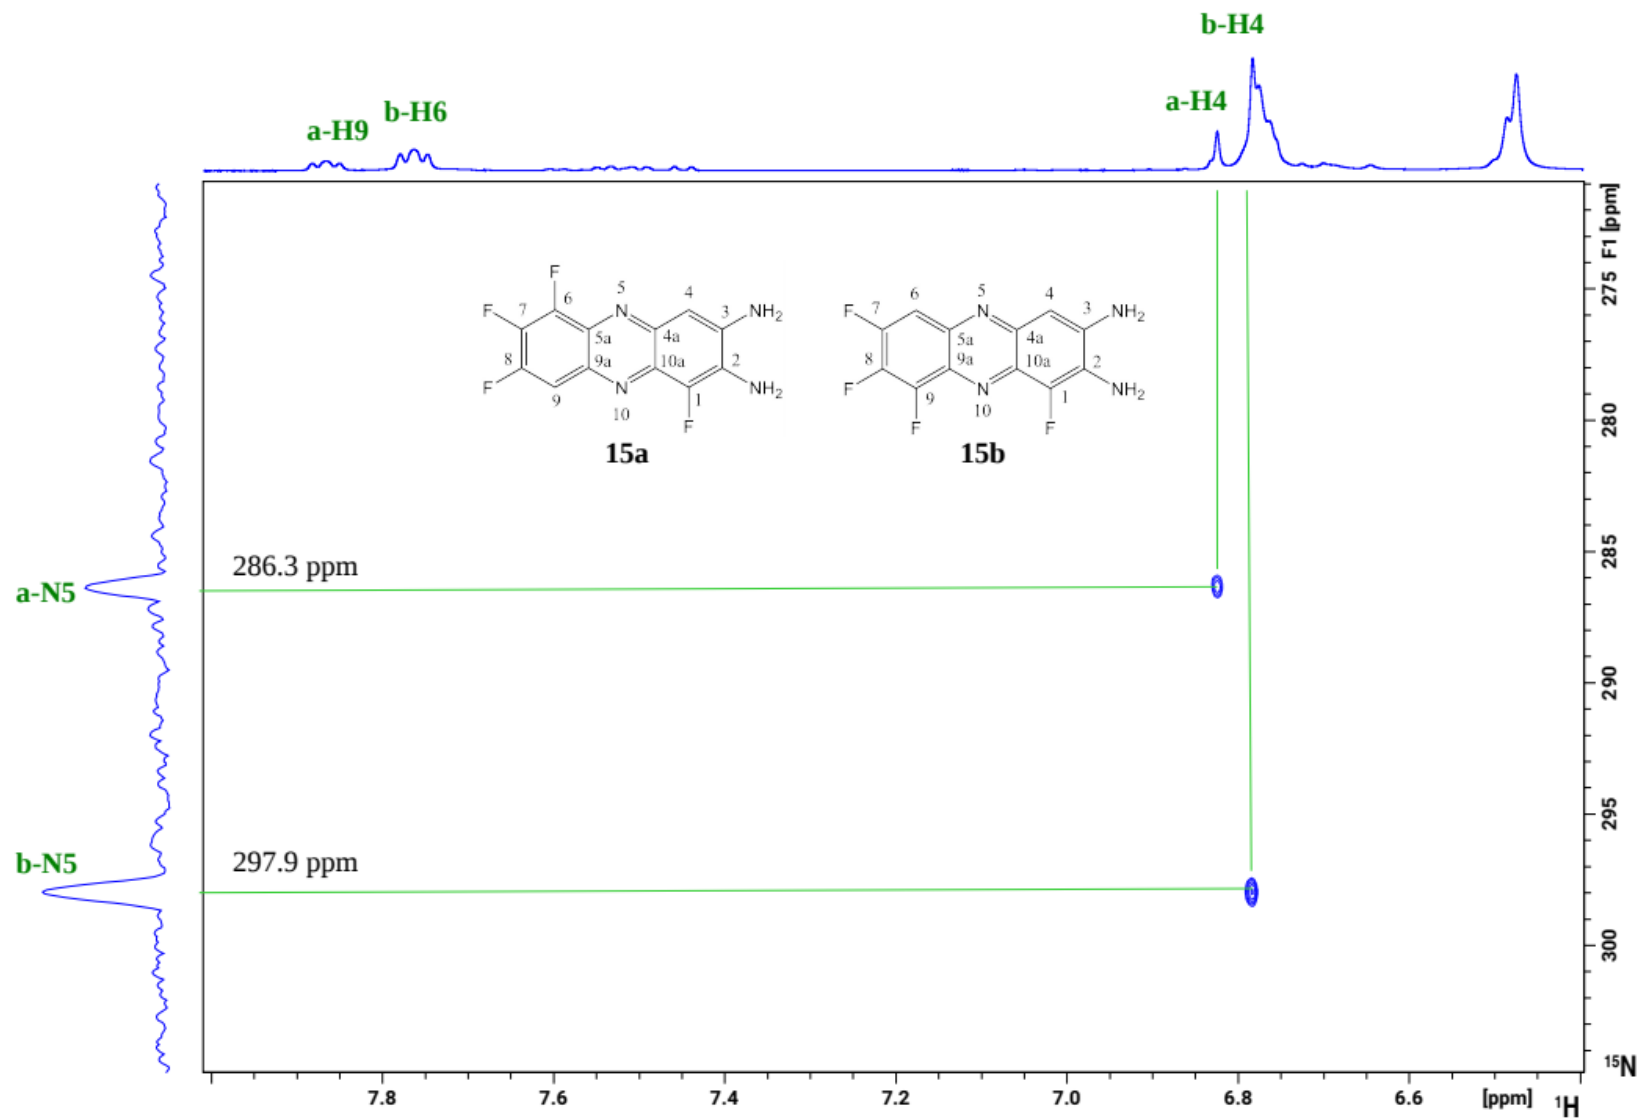

$^1\text{H}$  NMR spectrum of **16** (DMSO- $d_6$ ), Bruker AV-600 ( $^1\text{H}$  – 600.30 MHz)

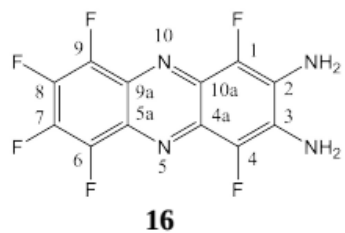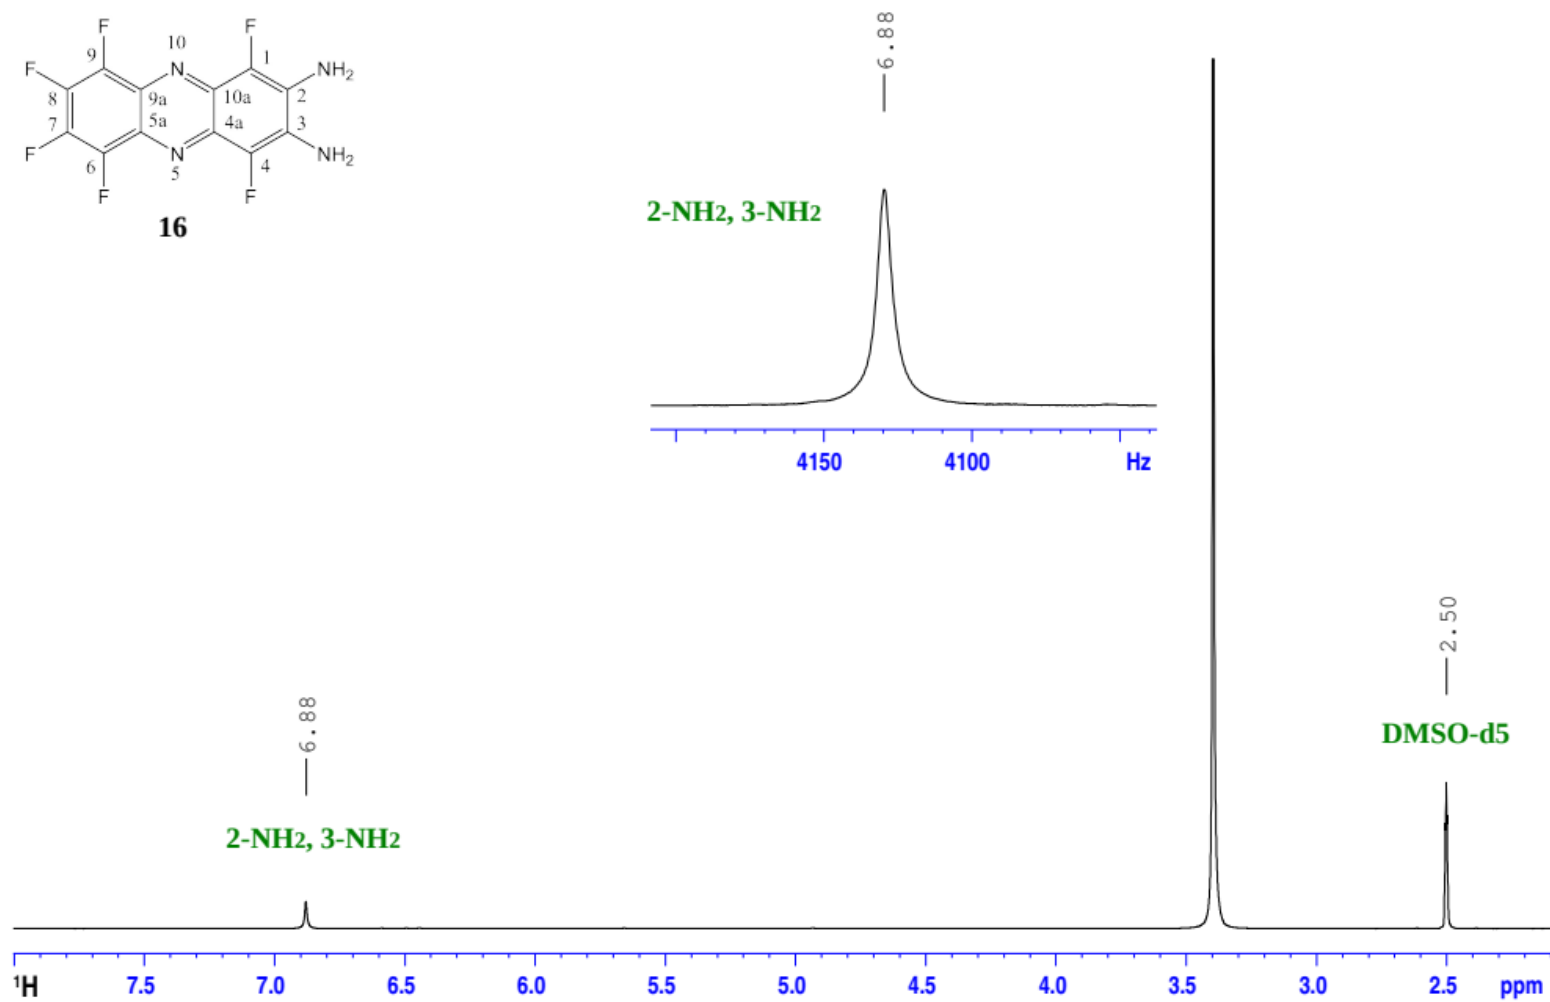

$^{19}\text{F}$  NMR spectrum of **16** (DMSO-d<sub>6</sub>), Bruker AV-300 ( $^{19}\text{F}$  – 282.40 MHz)

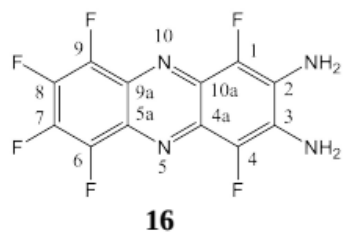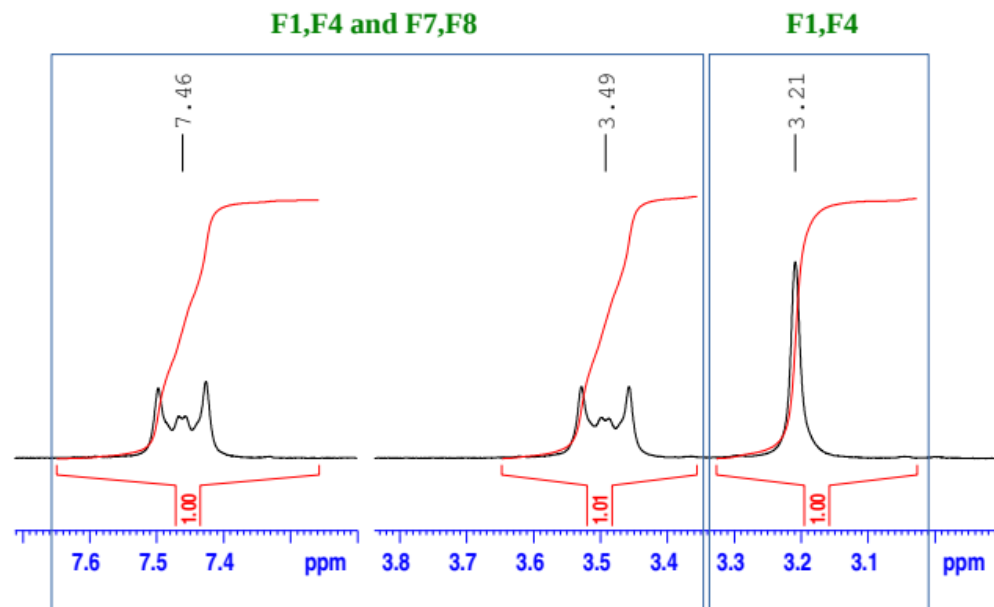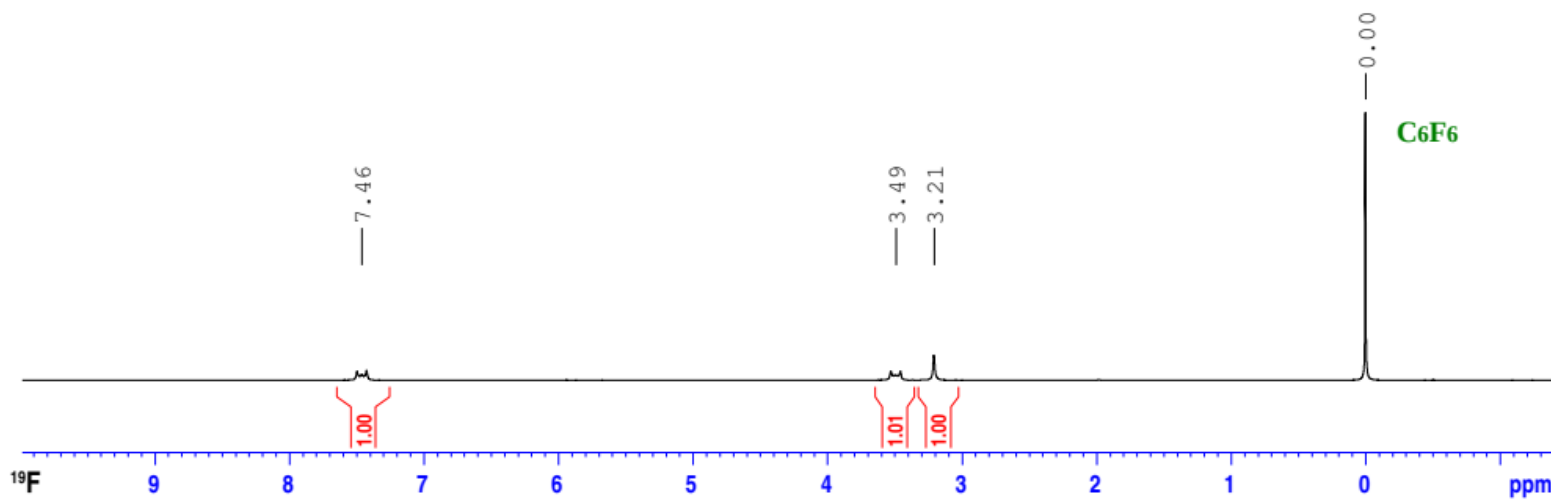



$^{13}\text{C}\{^1\text{H}\}$  NMR spectrum of **16** (DMSO-d<sub>6</sub>), Bruker AV-600 ( $^1\text{H}$  – 600.30,  $^{13}\text{C}$  – 150.95 MHz)

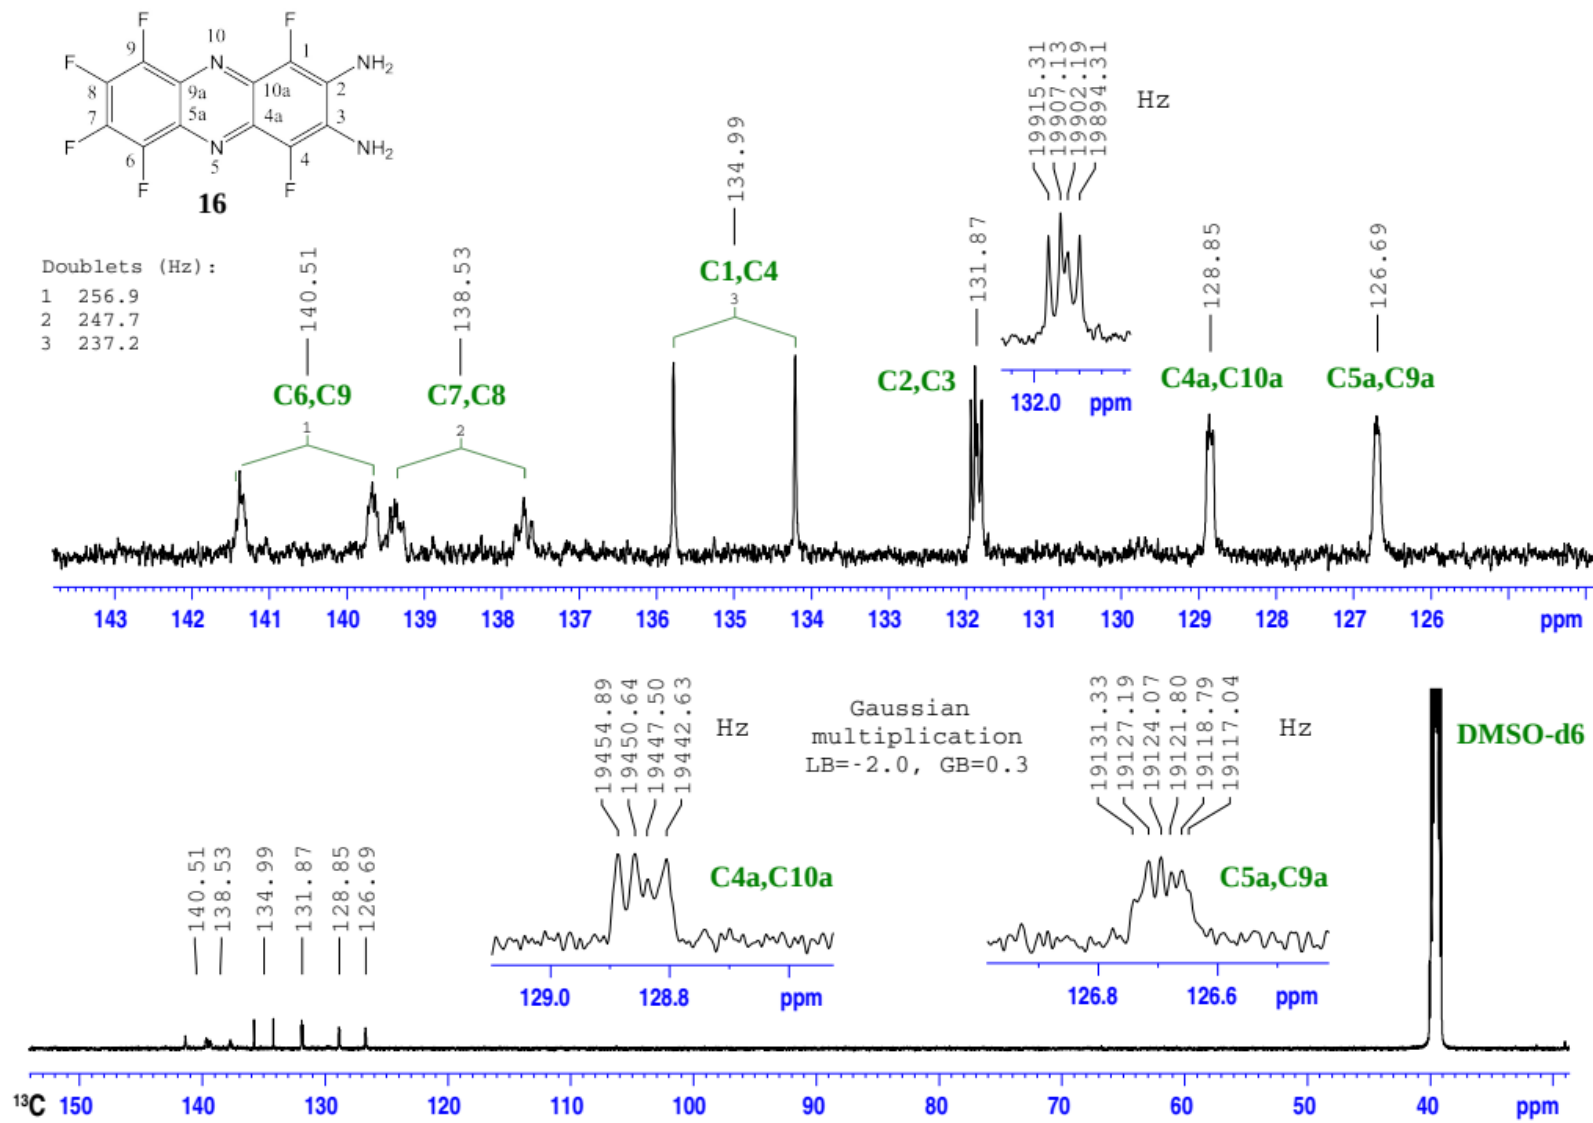

Supplement: d3nj02875e1.pdf [file d3nj02875e1.pdf]
